# Supplementary material for: Pathogen-specific stomatal responses in cacao leaves to Phytophthora megakarya and Rhizoctonia solani
Source: Sci Rep. 2025 Mar 27;15:10584. doi: 10.1038/s41598-025-94859-5 (PMC11950177; doi:10.1038/s41598-025-94859-5)
Supplement: Supplementary file 1 — Supplementary Material 1 [file 41598_2025_94859_MOESM1_ESM.xlsx]

## Sheet: Supplementary data- raw phenoty
Time	Area	Perimeter	Length	Width	LWR	Circularity	Distance between IS and CG	Trial	Light Dark	Hour	Strain	Genotype	Specific condition
L0	302.469	67.903	23.9341	17.9505	1.33333	0.824353	2.88742	1	L	0	ZTH0145	SCA6	L-0-ZTH0145-SCA6
L0	232.099	65.1416	23.9856	11.3312	2.11678	0.687331	6.5582	1	L	0	ZTH0145	SCA6	L-0-ZTH0145-SCA6
L0	219.136	58.2053	21.3437	15.7919	1.35157	0.812827	1.31658	1	L	0	ZTH0145	SCA6	L-0-ZTH0145-SCA6
L0	198.148	55.9831	21.3437	14.2292	1.5	0.794486	1.60453	1	L	0	ZTH0145	SCA6	L-0-ZTH0145-SCA6
L0	195.062	56.2527	21.0818	13.0052	1.62103	0.774632	2.20622	1	L	0	ZTH0145	SCA6	L-0-ZTH0145-SCA6
L0	164.815	50.2369	18.6256	12.6686	1.47022	0.820655	1.98602	1	L	0	ZTH0145	SCA6	L-0-ZTH0145-SCA6
L0	191.358	59.3954	22.4983	10.4822	2.14633	0.681634	2.98694	1	L	0	ZTH0145	SCA6	L-0-ZTH0145-SCA6
L0	277.778	67.903	25.8438	16.9239	1.52706	0.757059	0.991455	1	L	0	ZTH0145	SCA6	L-0-ZTH0145-SCA6
L0	183.333	51.5386	18.6256	12.6686	1.47022	0.867332	2.49269	1	L	0	ZTH0145	SCA6	L-0-ZTH0145-SCA6
L0	175.309	53.11	20.0308	11.967	1.67383	0.781018	1.05651	1	L	0	ZTH0145	SCA6	L-0-ZTH0145-SCA6
L0	154.938	50.2369	20.2759	10.2439	1.97931	0.771477	2.67441	1	L	0	ZTH0145	SCA6	L-0-ZTH0145-SCA6
L0	112.346	42.3801	16.5179	8.46197	1.95201	0.786034	2.31759	1	L	0	ZTH0145	SCA6	L-0-ZTH0145-SCA6
L0	150	48.3959	17.2491	11.6003	1.48695	0.804791	1.25839	1	L	0	ZTH0145	SCA6	L-0-ZTH0145-SCA6
L0	158.642	50.7761	16.9967	12.4226	1.36821	0.773231	2.85055	1	L	0	ZTH0145	SCA6	L-0-ZTH0145-SCA6
L0	146.296	53.7609	20.4879	12.6686	1.61722	0.636079	4.11098	1	L	0	ZTH0145	SCA6	L-0-ZTH0145-SCA6
L0	230.247	63.1889	25.3372	13.5628	1.86814	0.724638	0.63401	1	L	0	ZTH0145	SCA6	L-0-ZTH0145-SCA6
L0	141.975	55.3322	22.4983	8.46197	2.65875	0.582729	2.67927	1	L	0	ZTH0145	SCA6	L-0-ZTH0145-SCA6
L0	141.358	48.0147	17.9161	11.1665	1.60445	0.770517	0.239533	1	L	0	ZTH0145	SCA6	L-0-ZTH0145-SCA6
L0	185.185	55.7135	19.7828	15.7919	1.25272	0.749714	2.1271	1	L	0	ZTH0145	SCA6	L-0-ZTH0145-SCA6
L0	133.951	51.5386	21.3726	9.93808	2.15058	0.633707	0.897126	1	L	0	ZTH0145	SCA6	L-0-ZTH0145-SCA6
L0	130.864	49.586	20.3973	8.95806	2.27698	0.668825	1.84662	1	L	0	ZTH0145	SCA6	L-0-ZTH0145-SCA6
L0	106.79	43.031	16.178	9.16246	1.76569	0.724732	2.44098	1	L	0	ZTH0145	SCA6	L-0-ZTH0145-SCA6
L0	93.2099	41.7293	16.178	7.02728	2.30217	0.672651	4.8361	1	L	0	ZTH0145	SCA6	L-0-ZTH0145-SCA6
L0	108.025	43.9515	18.3922	9.93808	1.85068	0.702725	0.565569	1	L	0	ZTH0145	SCA6	L-0-ZTH0145-SCA6
L0	145.679	49.9673	19.4047	10.2439	1.89426	0.733222	1.64109	1	L	0	ZTH0145	SCA6	L-0-ZTH0145-SCA6
L0	121.605	48.3959	19.4047	9.16246	2.11785	0.652444	5.03553	1	L	0	ZTH0145	SCA6	L-0-ZTH0145-SCA6
L0	90.1234	38.317	13.9222	8.95806	1.55415	0.771374	0.404683	1	L	0	ZTH0145	SCA6	L-0-ZTH0145-SCA6
L0	167.901	54.0305	20.2759	11.3312	1.78939	0.722747	2.44031	1	L	0	ZTH0145	SCA6	L-0-ZTH0145-SCA6
L0	194.444	60.0463	23.7528	12.4226	1.91207	0.677694	0.651562	1	L	0	ZTH0145	SCA6	L-0-ZTH0145-SCA6
L24	271.605	64.7603	21.9145	16.4054	1.33582	0.813823	2.092	1	L	24	ZTH0145	SCA6	L-24-ZTH0145-SCA6
L24	304.938	71.427	26.6898	14.4871	1.84231	0.751099	0.579067	1	L	24	ZTH0145	SCA6	L-24-ZTH0145-SCA6
L24	285.802	67.6334	25.8438	15.9087	1.62451	0.785151	0.388259	1	L	24	ZTH0145	SCA6	L-24-ZTH0145-SCA6
L24	220.37	59.1258	22.9061	12.6686	1.8081	0.792153	2.29811	1	L	24	ZTH0145	SCA6	L-24-ZTH0145-SCA6
L24	163.58	53.7609	21.3726	10.0615	2.12419	0.711227	0.369518	1	L	24	ZTH0145	SCA6	L-24-ZTH0145-SCA6
L24	184.568	61.5059	23.544	10.5409	2.23358	0.613101	7.1684	1	L	24	ZTH0145	SCA6	L-24-ZTH0145-SCA6
L24	302.469	71.9662	28.48	15.476	1.84027	0.733895	2.67307	1	L	24	ZTH0145	SCA6	L-24-ZTH0145-SCA6
L24	194.444	55.6018	21.5739	12.4226	1.73666	0.790365	0.742855	1	L	24	ZTH0145	SCA6	L-24-ZTH0145-SCA6
L24	240.123	62.2685	23.9341	13.4256	1.78272	0.77823	1.5712	1	L	24	ZTH0145	SCA6	L-24-ZTH0145-SCA6
L24	379.012	78.0936	29.1653	17.5682	1.66012	0.780966	1.1628	1	L	24	ZTH0145	SCA6	L-24-ZTH0145-SCA6
L24	153.086	49.586	17.9505	11.967	1.5	0.782399	1.29168	1	L	24	ZTH0145	SCA6	L-24-ZTH0145-SCA6
L24	227.778	60.9667	23.544	15.1127	1.55789	0.770079	0.759542	1	L	24	ZTH0145	SCA6	L-24-ZTH0145-SCA6
L24	219.753	58.4749	19.6576	16.5179	1.19008	0.807618	1.89552	1	L	24	ZTH0145	SCA6	L-24-ZTH0145-SCA6
L24	194.444	58.2053	22.0549	13.3795	1.64841	0.721241	1.05471	1	L	24	ZTH0145	SCA6	L-24-ZTH0145-SCA6
L24	229.012	68.5539	27.7778	11.6003	2.39457	0.612357	1.55378	1	L	24	ZTH0145	SCA6	L-24-ZTH0145-SCA6
L24	222.222	61.9989	25.5797	13.5628	1.88601	0.72649	2.71061	1	L	24	ZTH0145	SCA6	L-24-ZTH0145-SCA6
L24	233.333	61.2363	22.3331	15.5952	1.43205	0.781931	1.95539	1	L	24	ZTH0145	SCA6	L-24-ZTH0145-SCA6
L24	220.37	60.9667	21.3726	14.9071	1.43372	0.745036	2.60439	1	L	24	ZTH0145	SCA6	L-24-ZTH0145-SCA6
L24	201.852	60.9667	25.3372	11.6003	2.18418	0.682428	4.40865	1	L	24	ZTH0145	SCA6	L-24-ZTH0145-SCA6
L24	310.494	72.617	26.4108	17.9505	1.47131	0.739922	2.31855	1	L	24	ZTH0145	SCA6	L-24-ZTH0145-SCA6
L24	129.012	45.7924	16.178	10.2439	1.57928	0.773132	4.68494	1	L	24	ZTH0145	SCA6	L-24-ZTH0145-SCA6
L24	130.864	47.3638	17.9161	10.4822	1.7092	0.733057	3.53444	1	L	24	ZTH0145	SCA6	L-24-ZTH0145-SCA6
L24	184.568	53.3796	20.4879	12.4226	1.64924	0.813983	1.30882	1	L	24	ZTH0145	SCA6	L-24-ZTH0145-SCA6
L24	185.185	51.269	17.9161	15.436	1.16067	0.885331	0.585644	1	L	24	ZTH0145	SCA6	L-24-ZTH0145-SCA6
L24	147.531	49.3164	18.3249	10.2439	1.78885	0.762272	4.83026	1	L	24	ZTH0145	SCA6	L-24-ZTH0145-SCA6
L24	164.815	50.6182	17.3561	14.2292	1.21976	0.808339	3.09477	1	L	24	ZTH0145	SCA6	L-24-ZTH0145-SCA6
L24	177.16	59.1258	24.5452	10.0615	2.43951	0.636829	0.752025	1	L	24	ZTH0145	SCA6	L-24-ZTH0145-SCA6
L24	154.321	50.8878	19.7828	10.2439	1.93117	0.748873	2.70311	1	L	24	ZTH0145	SCA6	L-24-ZTH0145-SCA6
L24	203.704	55.3322	20.4275	14.4444	1.41421	0.836089	1.21323	1	L	24	ZTH0145	SCA6	L-24-ZTH0145-SCA6
L48	240.123	60.5855	20.4275	15.9087	1.28405	0.822068	2.66049	1	L	48	ZTH0145	SCA6	L-48-ZTH0145-SCA6
L48	151.852	49.586	18.0876	11.8113	1.53138	0.776089	1.63482	1	L	48	ZTH0145	SCA6	L-48-ZTH0145-SCA6
L48	167.284	53.3796	20.7573	12.6686	1.63848	0.737758	0.907862	1	L	48	ZTH0145	SCA6	L-48-ZTH0145-SCA6
L48	296.296	74.9509	28.3279	12.4226	2.28035	0.662799	3.18313	1	L	48	ZTH0145	SCA6	L-48-ZTH0145-SCA6
L48	172.222	51.5386	19.4047	11.3312	1.71251	0.814766	0.674225	1	L	48	ZTH0145	SCA6	L-48-ZTH0145-SCA6
L48	270.37	66.9825	26.0342	14.2292	1.82963	0.757262	2.29621	1	L	48	ZTH0145	SCA6	L-48-ZTH0145-SCA6
L48	317.284	74.9509	25.3372	19.6889	1.28688	0.709747	1.53378	1	L	48	ZTH0145	SCA6	L-48-ZTH0145-SCA6
L48	283.951	66.9825	23.9341	17.9505	1.33333	0.795298	1.71237	1	L	48	ZTH0145	SCA6	L-48-ZTH0145-SCA6
L48	352.469	74.8393	27.8665	17.8125	1.56444	0.79081	4.43278	1	L	48	ZTH0145	SCA6	L-48-ZTH0145-SCA6
L48	262.346	66.3316	23.9856	17.2491	1.39054	0.749277	1.39093	1	L	48	ZTH0145	SCA6	L-48-ZTH0145-SCA6
L48	238.889	61.7293	22.9061	12.6686	1.8081	0.787814	0.353333	1	L	48	ZTH0145	SCA6	L-48-ZTH0145-SCA6
L48	179.63	54.6813	21.0818	11.6003	1.81735	0.754935	0.221342	1	L	48	ZTH0145	SCA6	L-48-ZTH0145-SCA6
L48	150	50.2369	19.4365	12.0185	1.61722	0.746888	2.39145	1	L	48	ZTH0145	SCA6	L-48-ZTH0145-SCA6
L48	193.21	52.4591	18.8889	14.9071	1.2671	0.882261	2.02162	1	L	48	ZTH0145	SCA6	L-48-ZTH0145-SCA6
L48	158.025	53.11	20.0308	12.9577	1.54587	0.704016	2.62758	1	L	48	ZTH0145	SCA6	L-48-ZTH0145-SCA6
L48	221.605	62.2685	25.9391	12.5708	2.06345	0.718212	4.16594	1	L	48	ZTH0145	SCA6	L-48-ZTH0145-SCA6
L48	179.63	53.3796	19.1807	13.5172	1.41898	0.792205	2.52401	1	L	48	ZTH0145	SCA6	L-48-ZTH0145-SCA6
L48	228.395	66.062	25.9391	12.4226	2.08806	0.657646	4.14828	1	L	48	ZTH0145	SCA6	L-48-ZTH0145-SCA6
L48	207.407	59.0141	20.4879	14.2292	1.43985	0.74838	3.41115	1	L	48	ZTH0145	SCA6	L-48-ZTH0145-SCA6
L48	191.358	56.2527	20.4275	13.4256	1.52154	0.759924	2.39586	1	L	48	ZTH0145	SCA6	L-48-ZTH0145-SCA6
L48	272.222	65.0299	23.4389	16.0247	1.46268	0.808923	1.18667	1	L	48	ZTH0145	SCA6	L-48-ZTH0145-SCA6
L48	117.901	43.9515	15.1127	11.6003	1.30279	0.766974	0.527643	1	L	48	ZTH0145	SCA6	L-48-ZTH0145-SCA6
L48	147.531	48.3959	18.3922	10.9432	1.6807	0.791544	1.65854	1	L	48	ZTH0145	SCA6	L-48-ZTH0145-SCA6
L48	165.432	49.9673	16.9967	12.4226	1.36821	0.832641	3.41088	1	L	48	ZTH0145	SCA6	L-48-ZTH0145-SCA6
L48	146.914	51.8082	18.9215	12.2726	1.54177	0.687819	1.53539	1	L	48	ZTH0145	SCA6	L-48-ZTH0145-SCA6
L48	135.802	48.6655	19.8762	9.93808	2	0.720567	1.38665	1	L	48	ZTH0145	SCA6	L-48-ZTH0145-SCA6
L48	146.296	51.5386	20.4275	9.49334	2.15178	0.692113	4.17793	1	L	48	ZTH0145	SCA6	L-48-ZTH0145-SCA6
L48	171.605	50.8878	16.4054	14.9071	1.10051	0.832747	2.02299	1	L	48	ZTH0145	SCA6	L-48-ZTH0145-SCA6
L48	209.259	63.5702	26.1524	11.3312	2.30801	0.650709	0.53342	1	L	48	ZTH0145	SCA6	L-48-ZTH0145-SCA6
L48	145.062	49.3164	19.0192	10.0615	1.89028	0.749514	4.69489	1	L	48	ZTH0145	SCA6	L-48-ZTH0145-SCA6
L0	180.247	51.269	17.9161	13.9222	1.28688	0.861722	0.425063	2	L	0	ZTH0145	SCA6	L-0-ZTH0145-SCA6
L0	208.025	59.1258	22.0549	14.2292	1.54998	0.747775	1.65612	2	L	0	ZTH0145	SCA6	L-0-ZTH0145-SCA6
L0	149.383	50.5065	19.7828	10.2439	1.93117	0.735895	0.888372	2	L	0	ZTH0145	SCA6	L-0-ZTH0145-SCA6
L0	205.556	59.665	22.1387	13.0052	1.7023	0.725605	1.44965	2	L	0	ZTH0145	SCA6	L-0-ZTH0145-SCA6
L0	141.358	47.0942	16.178	11.6003	1.39462	0.800932	2.86199	2	L	0	ZTH0145	SCA6	L-0-ZTH0145-SCA6
L0	189.506	53.7609	19.6889	12.6686	1.55415	0.82395	4.34668	2	L	0	ZTH0145	SCA6	L-0-ZTH0145-SCA6
L0	138.889	48.0147	18.8889	9.93808	1.90066	0.757059	2.51349	2	L	0	ZTH0145	SCA6	L-0-ZTH0145-SCA6
L0	108.642	45.9041	18.9867	8.46197	2.24376	0.647894	2.37752	2	L	0	ZTH0145	SCA6	L-0-ZTH0145-SCA6
L0	123.457	45.5228	17.3916	9.93808	1.75	0.748628	0.38376	2	L	0	ZTH0145	SCA6	L-0-ZTH0145-SCA6
L0	112.346	42.3801	16.4054	9.93808	1.65076	0.786034	1.50908	2	L	0	ZTH0145	SCA6	L-0-ZTH0145-SCA6
L0	223.457	62.5381	22.9061	12.6686	1.8081	0.717983	3.57152	2	L	0	ZTH0145	SCA6	L-0-ZTH0145-SCA6
L0	92.5926	39.2375	15.7919	8.67805	1.81975	0.755761	0.354173	2	L	0	ZTH0145	SCA6	L-0-ZTH0145-SCA6
L0	79.6296	35.9831	13.9222	7.45356	1.86786	0.772837	0.294605	2	L	0	ZTH0145	SCA6	L-0-ZTH0145-SCA6
L0	93.8271	41.0784	16.6667	8.67805	1.92055	0.698733	1.69853	2	L	0	ZTH0145	SCA6	L-0-ZTH0145-SCA6
L0	128.395	46.062	15.476	11.967	1.29322	0.760452	0.478001	2	L	0	ZTH0145	SCA6	L-0-ZTH0145-SCA6
L0	130.247	49.3164	20.3973	8.95806	2.27698	0.672968	2.46626	2	L	0	ZTH0145	SCA6	L-0-ZTH0145-SCA6
L0	118.518	48.6655	19.4047	7.45356	2.60342	0.628858	1.42632	2	L	0	ZTH0145	SCA6	L-0-ZTH0145-SCA6
L0	200.617	56.5223	20.7573	12.6686	1.63848	0.789112	2.92762	2	L	0	ZTH0145	SCA6	L-0-ZTH0145-SCA6
L0	143.21	51.8082	20.9644	9.55814	2.19336	0.670479	1.37486	2	L	0	ZTH0145	SCA6	L-0-ZTH0145-SCA6
L0	181.481	54.0305	20.0308	12.0185	1.66667	0.781205	1.19659	2	L	0	ZTH0145	SCA6	L-0-ZTH0145-SCA6
L0	150.617	46.8246	16.6667	12.6686	1.31559	0.86325	0.649228	2	L	0	ZTH0145	SCA6	L-0-ZTH0145-SCA6
L0	156.79	47.7451	17.5682	11.6003	1.51446	0.864314	2.23453	2	L	0	ZTH0145	SCA6	L-0-ZTH0145-SCA6
L0	114.815	42.9193	16.9239	9.49334	1.78272	0.783252	2.54319	2	L	0	ZTH0145	SCA6	L-0-ZTH0145-SCA6
L0	112.963	41.7293	16.0247	10.4822	1.52875	0.8152	1.03037	2	L	0	ZTH0145	SCA6	L-0-ZTH0145-SCA6
L0	164.197	49.9673	16.9604	14.4871	1.17072	0.826428	1.40782	2	L	0	ZTH0145	SCA6	L-0-ZTH0145-SCA6
L0	116.667	46.7129	18.9215	7.85674	2.40832	0.671866	0.362656	2	L	0	ZTH0145	SCA6	L-0-ZTH0145-SCA6
L0	179.012	54.0305	18.9215	13.3795	1.41421	0.770576	1.38467	2	L	0	ZTH0145	SCA6	L-0-ZTH0145-SCA6
L0	200.617	56.9036	20.2759	12.4226	1.63218	0.778573	5.7287	2	L	0	ZTH0145	SCA6	L-0-ZTH0145-SCA6
L0	144.444	48.1263	18.0876	12.5708	1.43886	0.783691	0.378426	2	L	0	ZTH0145	SCA6	L-0-ZTH0145-SCA6
L0	183.951	57.5544	21.8299	11.6003	1.88183	0.697836	0.200888	2	L	0	ZTH0145	SCA6	L-0-ZTH0145-SCA6
L0	170.37	52.1895	18.3249	12.6686	1.44648	0.786027	1.33552	2	L	0	ZTH0145	SCA6	L-0-ZTH0145-SCA6
L0	167.901	51.269	17.9505	13.0052	1.38026	0.8027	1.34701	2	L	0	ZTH0145	SCA6	L-0-ZTH0145-SCA6
L24	87.6543	41.0784	17.2848	7.85674	2.2	0.652764	0.049105	2	L	24	ZTH0145	SCA6	L-24-ZTH0145-SCA6
L24	74.0741	34.793	13.7437	6.75862	2.0335	0.768939	3.83598	2	L	24	ZTH0145	SCA6	L-24-ZTH0145-SCA6
L24	68.5185	38.5866	14.8241	6.75862	2.19336	0.578289	2.20377	2	L	24	ZTH0145	SCA6	L-24-ZTH0145-SCA6
L24	51.2346	32.8404	14.2292	5.55556	2.56125	0.596975	0.364058	2	L	24	ZTH0145	SCA6	L-24-ZTH0145-SCA6
L24	93.2099	37.6661	13.3795	10.2439	1.30609	0.825601	1.42503	2	L	24	ZTH0145	SCA6	L-24-ZTH0145-SCA6
L24	69.1358	36.0948	14.8241	5.66558	2.61652	0.666845	2.18001	2	L	24	ZTH0145	SCA6	L-24-ZTH0145-SCA6
L24	77.1605	44.4907	18.3922	6.47884	2.83881	0.489854	2.35982	2	L	24	ZTH0145	SCA6	L-24-ZTH0145-SCA6
L24	156.173	51.9199	20.2759	8.95806	2.26342	0.728027	3.66123	2	L	24	ZTH0145	SCA6	L-24-ZTH0145-SCA6
L24	83.9506	37.0152	14.0546	8.08901	1.73749	0.769968	1.04674	2	L	24	ZTH0145	SCA6	L-24-ZTH0145-SCA6
L24	209.259	56.9036	19.6889	15.1127	1.3028	0.812112	0.64493	2	L	24	ZTH0145	SCA6	L-24-ZTH0145-SCA6
L24	70.9876	38.2053	12.4226	9.93808	1.25	0.611146	0.784833	2	L	24	ZTH0145	SCA6	L-24-ZTH0145-SCA6
L24	187.037	55.6018	22.4983	12.0185	1.87197	0.760256	0.343833	2	L	24	ZTH0145	SCA6	L-24-ZTH0145-SCA6
L24	303.704	71.427	28.8247	14.9071	1.93362	0.748058	1.21195	2	L	24	ZTH0145	SCA6	L-24-ZTH0145-SCA6
L24	217.901	60.0463	24.3939	12.9577	1.88258	0.759447	1.9912	2	L	24	ZTH0145	SCA6	L-24-ZTH0145-SCA6
L24	209.259	64.1094	26.8742	11.1665	2.40667	0.63981	4.06238	2	L	24	ZTH0145	SCA6	L-24-ZTH0145-SCA6
L24	87.037	38.2053	15.1127	7.11458	2.12419	0.749319	2.3525	2	L	24	ZTH0145	SCA6	L-24-ZTH0145-SCA6
L24	111.728	40.8088	14.4871	10.4822	1.38207	0.843074	1.40456	2	L	24	ZTH0145	SCA6	L-24-ZTH0145-SCA6
L24	245.062	62.2685	22.9061	13.4256	1.70615	0.794235	5.86091	2	L	24	ZTH0145	SCA6	L-24-ZTH0145-SCA6
L24	182.099	62.8077	23.4389	12.2726	1.90985	0.580085	4.17511	2	L	24	ZTH0145	SCA6	L-24-ZTH0145-SCA6
L24	39.5062	25.9041	10.2439	5.55556	1.84391	0.739839	2.86683	2	L	24	ZTH0145	SCA6	L-24-ZTH0145-SCA6
L24	198.148	59.1258	23.9341	11.967	2	0.712272	1.19918	2	L	24	ZTH0145	SCA6	L-24-ZTH0145-SCA6
L24	66.0494	35.4439	14.0546	5.98352	2.34888	0.660687	2.09854	2	L	24	ZTH0145	SCA6	L-24-ZTH0145-SCA6
L24	117.901	45.2532	17.9161	7.85674	2.28035	0.723484	1.91213	2	L	24	ZTH0145	SCA6	L-24-ZTH0145-SCA6
L24	111.728	45.7924	18.9215	8.67805	2.18039	0.669554	2.5958	2	L	24	ZTH0145	SCA6	L-24-ZTH0145-SCA6
L24	203.704	61.6176	23.544	11.6003	2.0296	0.674216	1.51472	2	L	24	ZTH0145	SCA6	L-24-ZTH0145-SCA6
L24	179.012	57.1732	21.8299	10.2439	2.131	0.68819	4.3474	2	L	24	ZTH0145	SCA6	L-24-ZTH0145-SCA6
L24	89.5062	37.6661	15.1127	8.67805	1.74149	0.792796	1.67681	2	L	24	ZTH0145	SCA6	L-24-ZTH0145-SCA6
L24	72.8395	37.9357	15.7919	6.28539	2.51247	0.636034	2.55971	2	L	24	ZTH0145	SCA6	L-24-ZTH0145-SCA6
L24	83.9506	35.7135	13.4256	8.46197	1.58658	0.827122	1.1019	2	L	24	ZTH0145	SCA6	L-24-ZTH0145-SCA6
L24	201.235	61.0784	24.5452	10.0615	2.43951	0.677855	3.26871	2	L	24	ZTH0145	SCA6	L-24-ZTH0145-SCA6
L24	136.42	48.0147	18.9867	9.49334	2	0.7436	2.79074	2	L	24	ZTH0145	SCA6	L-24-ZTH0145-SCA6
L24	211.728	60.9667	22.3607	13.9222	1.60612	0.715819	1.48972	2	L	24	ZTH0145	SCA6	L-24-ZTH0145-SCA6
L24	300	70.1252	27.8444	15.436	1.80385	0.766624	1.92692	2	L	24	ZTH0145	SCA6	L-24-ZTH0145-SCA6
L24	100	42.3801	16.6667	8.67805	1.92055	0.699657	1.60282	2	L	24	ZTH0145	SCA6	L-24-ZTH0145-SCA6
L24	106.79	44.872	17.9161	8.95806	2	0.666485	1.7357	2	L	24	ZTH0145	SCA6	L-24-ZTH0145-SCA6
L24	109.259	40.4275	14.4871	10.4822	1.38207	0.840067	1.26291	2	L	24	ZTH0145	SCA6	L-24-ZTH0145-SCA6
L24	41.358	26.555	10.9432	5.98352	1.82889	0.737017	1.49449	2	L	24	ZTH0145	SCA6	L-24-ZTH0145-SCA6
L24	136.42	47.0942	17.5682	12.0185	1.46176	0.772952	0.702395	2	L	24	ZTH0145	SCA6	L-24-ZTH0145-SCA6
L24	174.691	53.7609	20.8759	12.4226	1.68048	0.759537	0.301618	2	L	24	ZTH0145	SCA6	L-24-ZTH0145-SCA6
L24	79.6296	42.6497	17.5682	6.47884	2.71163	0.550113	4.4706	2	L	24	ZTH0145	SCA6	L-24-ZTH0145-SCA6
L24	84.5679	41.7293	16.9239	7.02728	2.40832	0.610286	1.30127	2	L	24	ZTH0145	SCA6	L-24-ZTH0145-SCA6
L24	102.469	40.5392	14.9071	9.93808	1.5	0.783524	1.8687	2	L	24	ZTH0145	SCA6	L-24-ZTH0145-SCA6
L24	120.37	43.9515	15.9087	10.2439	1.55299	0.783037	1.29414	2	L	24	ZTH0145	SCA6	L-24-ZTH0145-SCA6
L24	116.049	48.6655	20.0308	8.08901	2.4763	0.615757	2.44404	2	L	24	ZTH0145	SCA6	L-24-ZTH0145-SCA6
L24	237.654	63.1889	25.3372	13.5628	1.86814	0.747951	0.320149	2	L	24	ZTH0145	SCA6	L-24-ZTH0145-SCA6
L24	216.049	60.3158	21.5739	13.5628	1.59066	0.746277	2.05806	2	L	24	ZTH0145	SCA6	L-24-ZTH0145-SCA6
L24	257.407	64.4907	24.8452	13.5172	1.83804	0.777744	1.97814	2	L	24	ZTH0145	SCA6	L-24-ZTH0145-SCA6
L24	209.877	63.8398	25.5797	10.4822	2.4403	0.647128	4.48666	2	L	24	ZTH0145	SCA6	L-24-ZTH0145-SCA6
L24	165.432	51.269	19.4047	11.967	1.62152	0.790896	0.690184	2	L	24	ZTH0145	SCA6	L-24-ZTH0145-SCA6
L24	254.321	59.3954	19.6889	17.2491	1.14145	0.905913	1.59021	2	L	24	ZTH0145	SCA6	L-24-ZTH0145-SCA6
L24	114.815	43.6819	17.5682	11.1111	1.58114	0.756144	0.641994	2	L	24	ZTH0145	SCA6	L-24-ZTH0145-SCA6
L24	219.136	65.7924	26.3406	11.4396	2.30258	0.636167	2.44427	2	L	24	ZTH0145	SCA6	L-24-ZTH0145-SCA6
L24	256.79	65.6808	24.9691	13.5628	1.84099	0.748017	2.29041	2	L	24	ZTH0145	SCA6	L-24-ZTH0145-SCA6
L48	122.839	44.872	17.5682	9.49334	1.85058	0.766651	1.45444	2	L	48	ZTH0145	SCA6	L-48-ZTH0145-SCA6
L48	103.086	39.507	13.5172	10.0615	1.34346	0.829969	2.89607	2	L	48	ZTH0145	SCA6	L-48-ZTH0145-SCA6
L48	116.667	43.9515	17.5682	9.49334	1.85058	0.758943	1.19168	2	L	48	ZTH0145	SCA6	L-48-ZTH0145-SCA6
L48	84.5679	40.0463	16.4054	6.47884	2.53215	0.662661	2.57478	2	L	48	ZTH0145	SCA6	L-48-ZTH0145-SCA6
L48	161.728	52.1895	20.0308	10.5409	1.90029	0.746156	1.94964	2	L	48	ZTH0145	SCA6	L-48-ZTH0145-SCA6
L48	79.6296	36.3644	14.0546	8.08901	1.73749	0.756716	1.2708	2	L	48	ZTH0145	SCA6	L-48-ZTH0145-SCA6
L48	105.556	47.0942	17.9161	10.0615	1.78066	0.598076	3.149	2	L	48	ZTH0145	SCA6	L-48-ZTH0145-SCA6
L48	129.012	45.4112	16.5179	11.6003	1.42391	0.786169	2.44782	2	L	48	ZTH0145	SCA6	L-48-ZTH0145-SCA6
L48	202.469	54.4117	20.4879	14.2292	1.43985	0.859377	1.53025	2	L	48	ZTH0145	SCA6	L-48-ZTH0145-SCA6
L48	82.0987	40.0463	17.3561	5.55556	3.1241	0.643313	5.78714	2	L	48	ZTH0145	SCA6	L-48-ZTH0145-SCA6
L48	183.333	52.8404	19.7828	14.2292	1.3903	0.825124	2.34872	2	L	48	ZTH0145	SCA6	L-48-ZTH0145-SCA6
L48	175.926	52.4591	19.6889	11.6003	1.69727	0.803337	0.951205	2	L	48	ZTH0145	SCA6	L-48-ZTH0145-SCA6
L48	109.877	40.1579	13.5628	11.1111	1.22066	0.856194	0.814573	2	L	48	ZTH0145	SCA6	L-48-ZTH0145-SCA6
L48	76.5432	37.9357	14.6144	7.85674	1.86011	0.668375	1.8103	2	L	48	ZTH0145	SCA6	L-48-ZTH0145-SCA6
L48	104.321	41.7293	16.178	9.16246	1.76569	0.752835	1.43545	2	L	48	ZTH0145	SCA6	L-48-ZTH0145-SCA6
L48	144.444	50.5065	20.3973	10.4822	1.9459	0.711568	0.752469	2	L	48	ZTH0145	SCA6	L-48-ZTH0145-SCA6
L48	139.506	49.0468	19.1163	12.0185	1.59057	0.728755	1.64606	2	L	48	ZTH0145	SCA6	L-48-ZTH0145-SCA6
L48	79.6296	38.5866	14.4871	7.45356	1.94365	0.672066	0.394482	2	L	48	ZTH0145	SCA6	L-48-ZTH0145-SCA6
L48	156.173	51.1574	18.4926	10.4822	1.76419	0.749892	2.05259	2	L	48	ZTH0145	SCA6	L-48-ZTH0145-SCA6
L48	112.963	42.4918	15.7919	11.8113	1.33702	0.786204	0.44851	2	L	48	ZTH0145	SCA6	L-48-ZTH0145-SCA6
L48	160.494	51.8082	20.3973	11.4396	1.78304	0.751399	2.71568	2	L	48	ZTH0145	SCA6	L-48-ZTH0145-SCA6
L48	57.4074	31.3807	12.0185	6.47884	1.85504	0.732575	3.09423	2	L	48	ZTH0145	SCA6	L-48-ZTH0145-SCA6
L48	103.704	40.1579	14.8241	9.16246	1.61791	0.808093	1.70354	2	L	48	ZTH0145	SCA6	L-48-ZTH0145-SCA6
L48	97.5308	41.0784	16.5179	8.46197	1.95201	0.726315	1.52031	2	L	48	ZTH0145	SCA6	L-48-ZTH0145-SCA6
L48	218.518	64.379	25.3859	10.9432	2.31979	0.662536	7.16115	2	L	48	ZTH0145	SCA6	L-48-ZTH0145-SCA6
L48	223.457	61.6176	23.544	13.0052	1.81035	0.739595	4.89691	2	L	48	ZTH0145	SCA6	L-48-ZTH0145-SCA6
L48	185.185	53.11	18.6256	12.6686	1.47022	0.825019	2.88171	2	L	48	ZTH0145	SCA6	L-48-ZTH0145-SCA6
L48	53.0864	30.3486	11.3312	6.75862	1.67655	0.724297	0.487965	2	L	48	ZTH0145	SCA6	L-48-ZTH0145-SCA6
L48	136.42	47.0942	17.9161	10.0615	1.78066	0.772952	2.7389	2	L	48	ZTH0145	SCA6	L-48-ZTH0145-SCA6
L48	151.852	49.0468	18.8889	11.4396	1.65119	0.793247	2.9162	2	L	48	ZTH0145	SCA6	L-48-ZTH0145-SCA6
L48	209.259	63.031	23.3598	13.4256	1.73994	0.66189	0.768653	2	L	48	ZTH0145	SCA6	L-48-ZTH0145-SCA6
L48	200	57.9357	20.9644	12.9577	1.61791	0.748768	3.05049	2	L	48	ZTH0145	SCA6	L-48-ZTH0145-SCA6
L48	182.716	54.4117	21.3726	10.0615	2.12419	0.775535	4.40519	2	L	48	ZTH0145	SCA6	L-48-ZTH0145-SCA6
L48	154.938	48.7772	18.9215	13.3795	1.41421	0.818341	0.432587	2	L	48	ZTH0145	SCA6	L-48-ZTH0145-SCA6
L48	171.605	55.3322	21.8863	10.9432	2	0.704342	1.18736	2	L	48	ZTH0145	SCA6	L-48-ZTH0145-SCA6
L48	92.5926	39.2375	15.436	9.93808	1.55322	0.755761	0.993514	2	L	48	ZTH0145	SCA6	L-48-ZTH0145-SCA6
L48	180.247	55.8714	21.5739	12.0185	1.79506	0.725602	1.39439	2	L	48	ZTH0145	SCA6	L-48-ZTH0145-SCA6
L48	186.42	57.1732	22.4983	12.0185	1.87197	0.716667	3.37148	2	L	48	ZTH0145	SCA6	L-48-ZTH0145-SCA6
L0	166.049	52.4591	20.1231	11.1665	1.80209	0.758237	2.97187	3	L	0	ZTH0145	SCA6	L-0-ZTH0145-SCA6
L0	133.951	48.3959	19.4047	9.93808	1.95256	0.718682	1.03235	3	L	0	ZTH0145	SCA6	L-0-ZTH0145-SCA6
L0	151.852	49.9673	18.8889	11.4396	1.65119	0.76429	1.20806	3	L	0	ZTH0145	SCA6	L-0-ZTH0145-SCA6
L0	114.815	44.6024	17.9505	9.49334	1.89086	0.725257	0.877294	3	L	0	ZTH0145	SCA6	L-0-ZTH0145-SCA6
L0	201.235	60.6971	22.1387	14.0546	1.5752	0.686398	1.80877	3	L	0	ZTH0145	SCA6	L-0-ZTH0145-SCA6
L0	147.531	53.3796	19.4047	11.3312	1.71251	0.650642	4.45001	3	L	0	ZTH0145	SCA6	L-0-ZTH0145-SCA6
L0	156.173	49.3164	18.6256	11.6003	1.60561	0.806923	1.51222	3	L	0	ZTH0145	SCA6	L-0-ZTH0145-SCA6
L0	141.975	48.6655	17.5682	10.5409	1.66667	0.75332	1.35793	3	L	0	ZTH0145	SCA6	L-0-ZTH0145-SCA6
L0	194.444	55.9831	22.3607	12.4226	1.8	0.779636	0.974292	3	L	0	ZTH0145	SCA6	L-0-ZTH0145-SCA6
L0	146.914	50.8878	19.4365	10.4822	1.85424	0.712927	2.11402	3	L	0	ZTH0145	SCA6	L-0-ZTH0145-SCA6
L0	130.247	46.7129	18.3249	10.2439	1.78885	0.750072	1.43166	3	L	0	ZTH0145	SCA6	L-0-ZTH0145-SCA6
L0	130.247	46.7129	18.9867	10.5409	1.80123	0.750072	1.69255	3	L	0	ZTH0145	SCA6	L-0-ZTH0145-SCA6
L0	147.531	50.2369	19.4047	10.2439	1.89426	0.734594	2.17798	3	L	0	ZTH0145	SCA6	L-0-ZTH0145-SCA6
L0	121.605	46.1737	18.2236	10.2439	1.77896	0.716756	2.08197	3	L	0	ZTH0145	SCA6	L-0-ZTH0145-SCA6
L0	104.938	42.3801	16.6667	9.55814	1.74371	0.734207	1.08072	3	L	0	ZTH0145	SCA6	L-0-ZTH0145-SCA6
L0	141.975	47.7451	18.0876	10.2439	1.76569	0.782646	2.16525	3	L	0	ZTH0145	SCA6	L-0-ZTH0145-SCA6
L0	140.123	47.0942	17.3561	11.8113	1.46945	0.793937	0.403449	3	L	0	ZTH0145	SCA6	L-0-ZTH0145-SCA6
L0	200	57.1732	22.4983	12.0185	1.87197	0.768875	2.04507	3	L	0	ZTH0145	SCA6	L-0-ZTH0145-SCA6
L0	170.988	53.3796	20.4275	10.9432	1.86669	0.754092	4.93484	3	L	0	ZTH0145	SCA6	L-0-ZTH0145-SCA6
L0	159.877	49.3164	17.9505	13.0052	1.38026	0.82606	0.919226	3	L	0	ZTH0145	SCA6	L-0-ZTH0145-SCA6
L0	237.654	61.348	23.7788	15.1127	1.57343	0.793514	1.79505	3	L	0	ZTH0145	SCA6	L-0-ZTH0145-SCA6
L0	188.272	54.6813	20.4879	12.4226	1.64924	0.791255	0.97129	3	L	0	ZTH0145	SCA6	L-0-ZTH0145-SCA6
L0	214.197	56.9036	19.7828	15.1127	1.30901	0.831276	2.67936	3	L	0	ZTH0145	SCA6	L-0-ZTH0145-SCA6
L0	128.395	45.5228	16.9239	10.9432	1.54653	0.778573	1.39098	3	L	0	ZTH0145	SCA6	L-0-ZTH0145-SCA6
L0	100.617	41.7293	15.9087	8.46197	1.88002	0.726107	2.33803	3	L	0	ZTH0145	SCA6	L-0-ZTH0145-SCA6
L0	75.9259	40.4275	16.9239	5.98352	2.82843	0.583775	1.94922	3	L	0	ZTH0145	SCA6	L-0-ZTH0145-SCA6
L0	195.679	54.6813	20.9644	12.9577	1.61791	0.822386	1.30586	3	L	0	ZTH0145	SCA6	L-0-ZTH0145-SCA6
L0	198.148	60.0463	23.544	10.5409	2.23358	0.690602	4.48526	3	L	0	ZTH0145	SCA6	L-0-ZTH0145-SCA6
L0	220.988	58.4749	20.0308	16.5179	1.21268	0.812155	2.10449	3	L	0	ZTH0145	SCA6	L-0-ZTH0145-SCA6
L0	150	52.4591	19.7828	12.6686	1.56156	0.684951	4.20935	3	L	0	ZTH0145	SCA6	L-0-ZTH0145-SCA6
L0	253.086	64.2211	26.0342	14.2292	1.82963	0.771122	1.14189	3	L	0	ZTH0145	SCA6	L-0-ZTH0145-SCA6
L0	159.259	49.9673	20.4275	10.9994	1.85714	0.801573	0.055556	3	L	0	ZTH0145	SCA6	L-0-ZTH0145-SCA6
L0	104.938	40.1579	14.8241	9.16246	1.61791	0.817714	1.5865	3	L	0	ZTH0145	SCA6	L-0-ZTH0145-SCA6
L0	112.963	41.7293	16.0247	9.55814	1.67655	0.8152	0.921584	3	L	0	ZTH0145	SCA6	L-0-ZTH0145-SCA6
L0	181.481	56.634	21.8299	10.2439	2.131	0.711031	4.4349	3	L	0	ZTH0145	SCA6	L-0-ZTH0145-SCA6
L0	92.5926	38.8562	15.7919	8.01234	1.97094	0.770665	2.90474	3	L	0	ZTH0145	SCA6	L-0-ZTH0145-SCA6
L0	170.37	52.7287	19.8762	10.9432	1.81631	0.770033	2.35746	3	L	0	ZTH0145	SCA6	L-0-ZTH0145-SCA6
L0	179.012	53.4913	19.8762	12.4226	1.6	0.786189	1.53044	3	L	0	ZTH0145	SCA6	L-0-ZTH0145-SCA6
L0	119.753	44.2211	16.9604	8.95806	1.89331	0.769551	2.47315	3	L	0	ZTH0145	SCA6	L-0-ZTH0145-SCA6
L0	88.8889	39.2375	15.1127	8.08901	1.86831	0.725531	0.657847	3	L	0	ZTH0145	SCA6	L-0-ZTH0145-SCA6
L0	86.4197	38.317	15.1127	7.02728	2.15058	0.739674	2.66392	3	L	0	ZTH0145	SCA6	L-0-ZTH0145-SCA6
L24	233.333	58.8562	22.9061	14.9485	1.53234	0.846452	0.916119	3	L	24	ZTH0145	SCA6	L-24-ZTH0145-SCA6
L24	135.185	50.6182	20.1231	8.95806	2.24636	0.663019	1.80953	3	L	24	ZTH0145	SCA6	L-24-ZTH0145-SCA6
L24	147.531	48.0147	17.9161	11.4396	1.56615	0.804164	3.51228	3	L	24	ZTH0145	SCA6	L-24-ZTH0145-SCA6
L24	249.383	64.2211	24.8452	12.4226	2	0.759838	2.09308	3	L	24	ZTH0145	SCA6	L-24-ZTH0145-SCA6
L24	143.21	47.2059	18.0876	12.5708	1.43886	0.80759	2.69685	3	L	24	ZTH0145	SCA6	L-24-ZTH0145-SCA6
L24	209.259	55.0626	19.4365	16.0247	1.21291	0.867323	2.27079	3	L	24	ZTH0145	SCA6	L-24-ZTH0145-SCA6
L24	295.062	67.903	26.0104	15.476	1.6807	0.804164	2.91813	3	L	24	ZTH0145	SCA6	L-24-ZTH0145-SCA6
L24	179.012	53.11	18.4926	15.436	1.19801	0.797518	1.32698	3	L	24	ZTH0145	SCA6	L-24-ZTH0145-SCA6
L24	175.309	51.269	19.1163	14.4871	1.31954	0.838113	0.572099	3	L	24	ZTH0145	SCA6	L-24-ZTH0145-SCA6
L24	148.765	46.555	16.9604	12.9577	1.30891	0.86254	0.449909	3	L	24	ZTH0145	SCA6	L-24-ZTH0145-SCA6
L24	115.432	40.8088	14.9071	10.9432	1.36223	0.871021	2.06378	3	L	24	ZTH0145	SCA6	L-24-ZTH0145-SCA6
L24	175.309	55.7135	21.9145	10.4822	2.09064	0.709729	4.85333	3	L	24	ZTH0145	SCA6	L-24-ZTH0145-SCA6
L24	151.235	48.0147	17.5682	12.0185	1.46176	0.824353	0.455469	3	L	24	ZTH0145	SCA6	L-24-ZTH0145-SCA6
L24	193.21	56.5223	22.4983	12.0185	1.87197	0.759976	0.6391	3	L	24	ZTH0145	SCA6	L-24-ZTH0145-SCA6
L24	143.827	48.3959	18.6256	10.5409	1.76698	0.771672	3.6934	3	L	24	ZTH0145	SCA6	L-24-ZTH0145-SCA6
L24	248.765	66.8708	24.4697	12.6686	1.93152	0.699079	2.69405	3	L	24	ZTH0145	SCA6	L-24-ZTH0145-SCA6
L24	173.457	65.4112	23.544	11.967	1.96741	0.509445	2.39513	3	L	24	ZTH0145	SCA6	L-24-ZTH0145-SCA6
L24	140.741	46.4433	16.9604	11.4396	1.4826	0.819942	1.10881	3	L	24	ZTH0145	SCA6	L-24-ZTH0145-SCA6
L24	197.531	61.6176	23.1207	13.5628	1.70471	0.653785	4.47908	3	L	24	ZTH0145	SCA6	L-24-ZTH0145-SCA6
L24	200.617	57.2848	22.4983	11.967	1.88002	0.768244	4.81997	3	L	24	ZTH0145	SCA6	L-24-ZTH0145-SCA6
L24	154.938	47.4755	18.0876	12.5708	1.43886	0.863834	1.91409	3	L	24	ZTH0145	SCA6	L-24-ZTH0145-SCA6
L24	81.4815	36.476	13.5628	9.55814	1.41898	0.76958	0.472863	3	L	24	ZTH0145	SCA6	L-24-ZTH0145-SCA6
L24	59.2592	31.1111	11.1111	8.01234	1.38675	0.76937	0.925926	3	L	24	ZTH0145	SCA6	L-24-ZTH0145-SCA6
L24	175.309	61.6176	23.9856	9.16246	2.61781	0.580235	7.3	3	L	24	ZTH0145	SCA6	L-24-ZTH0145-SCA6
L24	159.259	51.8082	19.6576	11.8113	1.6643	0.745619	1.68678	3	L	24	ZTH0145	SCA6	L-24-ZTH0145-SCA6
L24	225.926	62.9193	24.9691	12.0185	2.07756	0.717146	5.56228	3	L	24	ZTH0145	SCA6	L-24-ZTH0145-SCA6
L24	170.37	51.8082	16.9967	14.8241	1.14656	0.797639	2.18873	3	L	24	ZTH0145	SCA6	L-24-ZTH0145-SCA6
L24	204.938	55.3322	19.7828	14.2292	1.3903	0.841157	0.587081	3	L	24	ZTH0145	SCA6	L-24-ZTH0145-SCA6
L24	153.704	48.0147	16.9239	13.4256	1.26057	0.837811	1.74143	3	L	24	ZTH0145	SCA6	L-24-ZTH0145-SCA6
L24	195.679	54.6813	20.6679	13.5628	1.52386	0.822386	2.43365	3	L	24	ZTH0145	SCA6	L-24-ZTH0145-SCA6
L24	156.79	48.2843	18.4926	10.4822	1.76419	0.845118	2.28797	3	L	24	ZTH0145	SCA6	L-24-ZTH0145-SCA6
L24	119.753	45.1416	17.3561	8.67805	2	0.738488	3.40609	3	L	24	ZTH0145	SCA6	L-24-ZTH0145-SCA6
L24	161.728	50.8878	17.3561	13.3795	1.29721	0.784819	0.961984	3	L	24	ZTH0145	SCA6	L-24-ZTH0145-SCA6
L24	143.827	46.7129	17.2491	12.6686	1.36156	0.828279	0.579829	3	L	24	ZTH0145	SCA6	L-24-ZTH0145-SCA6
L48	67.9012	37.9357	15.9087	5.98352	2.65875	0.592913	0.483959	3	L	48	ZTH0145	SCA6	L-48-ZTH0145-SCA6
L48	149.383	48.6655	17.9505	10.9432	1.64034	0.792624	2.01665	3	L	48	ZTH0145	SCA6	L-48-ZTH0145-SCA6
L48	177.16	55.6018	22.0549	11.1111	1.98494	0.72011	2.07305	3	L	48	ZTH0145	SCA6	L-48-ZTH0145-SCA6
L48	210.494	59.665	22.4983	12.0185	1.87197	0.743037	1.14376	3	L	48	ZTH0145	SCA6	L-48-ZTH0145-SCA6
L48	146.296	48.3959	18.0876	10.2439	1.76569	0.78492	0.937726	3	L	48	ZTH0145	SCA6	L-48-ZTH0145-SCA6
L48	136.42	60.9667	21.3437	13.3795	1.59525	0.461213	4.02229	3	L	48	ZTH0145	SCA6	L-48-ZTH0145-SCA6
L48	176.543	57.7124	22.9061	9.93808	2.30489	0.666075	4.42261	3	L	48	ZTH0145	SCA6	L-48-ZTH0145-SCA6
L48	146.296	46.7129	15.476	14.0546	1.10114	0.842498	1.10694	3	L	48	ZTH0145	SCA6	L-48-ZTH0145-SCA6
L48	201.235	57.5544	21.3437	14.2292	1.5	0.763405	5.23872	3	L	48	ZTH0145	SCA6	L-48-ZTH0145-SCA6
L48	279.63	69.4743	27.4424	14.4444	1.89986	0.728021	1.81023	3	L	48	ZTH0145	SCA6	L-48-ZTH0145-SCA6
L48	180.247	56.2527	21.3726	11.4396	1.86831	0.715799	3.10861	3	L	48	ZTH0145	SCA6	L-48-ZTH0145-SCA6
L48	172.839	52.1895	20.0308	12.9577	1.54587	0.797419	1.39411	3	L	48	ZTH0145	SCA6	L-48-ZTH0145-SCA6
L48	242.593	60.9667	23.1207	14.4871	1.59595	0.820166	0.468844	3	L	48	ZTH0145	SCA6	L-48-ZTH0145-SCA6
L48	108.025	39.507	14.0546	10.5409	1.33333	0.869728	0.638053	3	L	48	ZTH0145	SCA6	L-48-ZTH0145-SCA6
L48	205.556	58.2053	21.8299	12.6686	1.72315	0.762454	0.803593	3	L	48	ZTH0145	SCA6	L-48-ZTH0145-SCA6
L48	237.654	63.5702	24.5955	13.0052	1.8912	0.739006	2.39846	3	L	48	ZTH0145	SCA6	L-48-ZTH0145-SCA6
L48	114.815	41.0784	13.7437	11.6003	1.18477	0.855029	1.73999	3	L	48	ZTH0145	SCA6	L-48-ZTH0145-SCA6
L48	190.123	67.3638	27.3297	8.95806	3.05085	0.526493	3.92573	3	L	48	ZTH0145	SCA6	L-48-ZTH0145-SCA6
L48	184.568	56.5223	21.5739	11.1111	1.94165	0.725983	4.23316	3	L	48	ZTH0145	SCA6	L-48-ZTH0145-SCA6
L48	230.247	63.1889	24.9691	11.967	2.08649	0.724638	2.38884	3	L	48	ZTH0145	SCA6	L-48-ZTH0145-SCA6
L48	120.988	42.3801	15.7919	11.1111	1.42127	0.846498	0.703013	3	L	48	ZTH0145	SCA6	L-48-ZTH0145-SCA6
L48	216.049	67.3638	26.7591	11.1665	2.39637	0.598287	3.19313	3	L	48	ZTH0145	SCA6	L-48-ZTH0145-SCA6
L48	200	54.793	20.6679	15.1127	1.36758	0.837124	0.369494	3	L	48	ZTH0145	SCA6	L-48-ZTH0145-SCA6
L48	112.346	44.2211	18.3922	8.95806	2.05314	0.72195	0.531812	3	L	48	ZTH0145	SCA6	L-48-ZTH0145-SCA6
L48	306.79	74.6813	29.2288	13.5172	2.16233	0.691237	6.92976	3	L	48	ZTH0145	SCA6	L-48-ZTH0145-SCA6
L48	210.494	58.7445	22.9061	11.967	1.9141	0.766504	2.4623	3	L	48	ZTH0145	SCA6	L-48-ZTH0145-SCA6
L48	277.16	69.8556	28.4583	14.2292	2	0.713737	2.98414	3	L	48	ZTH0145	SCA6	L-48-ZTH0145-SCA6
L48	102.469	41.9989	13.9222	11.4396	1.21702	0.730008	0.357737	3	L	48	ZTH0145	SCA6	L-48-ZTH0145-SCA6
L48	101.852	41.7293	16.4054	8.01234	2.04751	0.735016	1.38358	3	L	48	ZTH0145	SCA6	L-48-ZTH0145-SCA6
L48	279.63	65.9504	21.8299	17.2491	1.26557	0.807902	2.76333	3	L	48	ZTH0145	SCA6	L-48-ZTH0145-SCA6
L48	134.568	48.6655	19.8762	8.46197	2.34888	0.714016	4.95	3	L	48	ZTH0145	SCA6	L-48-ZTH0145-SCA6
L48	169.136	51.8082	19.1807	12.4226	1.54402	0.791859	1.32654	3	L	48	ZTH0145	SCA6	L-48-ZTH0145-SCA6
L48	112.963	43.5702	17.3916	8.95806	1.94145	0.747767	2.22229	3	L	48	ZTH0145	SCA6	L-48-ZTH0145-SCA6
D0	159.259	49.586	17.9161	12.4226	1.44222	0.813947	2.24097	1	D	0	ZTH0145	SCA6	D-0-ZTH0145-SCA6
D0	202.469	62.1568	24.4697	11.1111	2.20227	0.658554	1.81327	1	D	0	ZTH0145	SCA6	D-0-ZTH0145-SCA6
D0	247.531	66.3316	25.652	13.0052	1.97244	0.706965	2.8728	1	D	0	ZTH0145	SCA6	D-0-ZTH0145-SCA6
D0	208.025	58.7445	21.9145	13.9222	1.57407	0.757513	2.13129	1	D	0	ZTH0145	SCA6	D-0-ZTH0145-SCA6
D0	232.099	58.4749	20.4275	15.9087	1.28405	0.852989	0.801218	1	D	0	ZTH0145	SCA6	D-0-ZTH0145-SCA6
D0	86.4197	40.1579	16.5179	7.02728	2.35053	0.673411	0.362785	1	D	0	ZTH0145	SCA6	D-0-ZTH0145-SCA6
D0	134.568	51.8082	21.3726	8.95806	2.38586	0.630019	4.07989	1	D	0	ZTH0145	SCA6	D-0-ZTH0145-SCA6
D0	182.099	56.5223	21.9145	11.4396	1.91568	0.716271	3.68142	1	D	0	ZTH0145	SCA6	D-0-ZTH0145-SCA6
D0	195.679	55.6018	20.9644	13.5628	1.54572	0.795383	2.29781	1	D	0	ZTH0145	SCA6	D-0-ZTH0145-SCA6
D0	95.679	45.7924	17.9505	7.02728	2.55441	0.573375	3.06622	1	D	0	ZTH0145	SCA6	D-0-ZTH0145-SCA6
D0	136.42	52.8404	19.4047	10.2439	1.89426	0.613981	2.20539	1	D	0	ZTH0145	SCA6	D-0-ZTH0145-SCA6
D0	119.753	42.3801	15.436	11.4396	1.34935	0.83786	0.670666	1	D	0	ZTH0145	SCA6	D-0-ZTH0145-SCA6
D0	143.21	48.6655	18.3249	10.2439	1.78885	0.759871	3.56017	1	D	0	ZTH0145	SCA6	D-0-ZTH0145-SCA6
D0	384.568	76.141	26.8971	19.7828	1.35963	0.833577	1.25446	1	D	0	ZTH0145	SCA6	D-0-ZTH0145-SCA6
D0	216.049	56.634	21.2277	14.9485	1.42006	0.846465	1.83406	1	D	0	ZTH0145	SCA6	D-0-ZTH0145-SCA6
D0	133.951	43.9515	15.1127	11.6003	1.30279	0.871379	1.87214	1	D	0	ZTH0145	SCA6	D-0-ZTH0145-SCA6
D0	220.988	58.8562	21.4591	13.0052	1.65004	0.801666	2.04418	1	D	0	ZTH0145	SCA6	D-0-ZTH0145-SCA6
D0	186.42	53.11	19.8762	12.4226	1.6	0.830519	1.82835	1	D	0	ZTH0145	SCA6	D-0-ZTH0145-SCA6
D0	271.605	69.2047	25.9391	15.7135	1.65076	0.712649	2.82296	1	D	0	ZTH0145	SCA6	D-0-ZTH0145-SCA6
D0	383.951	75.4901	26.4108	18.3249	1.44125	0.846652	2.14666	1	D	0	ZTH0145	SCA6	D-0-ZTH0145-SCA6
D0	161.728	52.7287	20.3973	11.4396	1.78304	0.730974	0.676869	1	D	0	ZTH0145	SCA6	D-0-ZTH0145-SCA6
D0	252.469	62.8077	22.6623	15.9087	1.42452	0.804253	2.66742	1	D	0	ZTH0145	SCA6	D-0-ZTH0145-SCA6
D0	171.605	55.8714	22.4983	10.4822	2.14633	0.690813	2.34541	1	D	0	ZTH0145	SCA6	D-0-ZTH0145-SCA6
D0	193.21	55.9831	21.5739	12.0185	1.79506	0.774686	3.39673	1	D	0	ZTH0145	SCA6	D-0-ZTH0145-SCA6
D0	234.568	65.1416	25.9391	14.9485	1.73524	0.694643	3.22579	1	D	0	ZTH0145	SCA6	D-0-ZTH0145-SCA6
D0	214.815	56.2527	18.3922	14.9071	1.23378	0.853076	2.26659	1	D	0	ZTH0145	SCA6	D-0-ZTH0145-SCA6
D0	207.407	55.8714	21.4591	13.0052	1.65004	0.834939	1.78117	1	D	0	ZTH0145	SCA6	D-0-ZTH0145-SCA6
D0	281.481	69.586	24.5955	17.5682	1.4	0.730492	5.99919	1	D	0	ZTH0145	SCA6	D-0-ZTH0145-SCA6
D24	359.259	76.2527	25.9391	18.0876	1.43409	0.776439	4.40679	1	D	24	ZTH0145	SCA6	D-24-ZTH0145-SCA6
D24	296.296	70.5065	25.9153	16.9604	1.52799	0.748993	2.0619	1	D	24	ZTH0145	SCA6	D-24-ZTH0145-SCA6
D24	361.728	79.5533	30.3478	14.9071	2.03579	0.718251	7.16055	1	D	24	ZTH0145	SCA6	D-24-ZTH0145-SCA6
D24	246.914	62.5381	21.5739	16.0247	1.34629	0.793352	1.25194	1	D	24	ZTH0145	SCA6	D-24-ZTH0145-SCA6
D24	272.839	66.062	24.3686	15.9087	1.53178	0.785621	3.50853	1	D	24	ZTH0145	SCA6	D-24-ZTH0145-SCA6
D24	288.889	70.5065	25.5797	14.4871	1.76569	0.730268	1.0352	1	D	24	ZTH0145	SCA6	D-24-ZTH0145-SCA6
D24	254.938	75.6018	28.8461	16.178	1.78304	0.560506	3.46674	1	D	24	ZTH0145	SCA6	D-24-ZTH0145-SCA6
D24	224.074	59.665	22.9061	13.7437	1.66667	0.790974	0.913089	1	D	24	ZTH0145	SCA6	D-24-ZTH0145-SCA6
D24	166.049	51.9199	18.9867	11.967	1.58658	0.774068	3.10826	1	D	24	ZTH0145	SCA6	D-24-ZTH0145-SCA6
D24	230.864	60.3158	22.4708	14.6144	1.53758	0.79745	1.34743	1	D	24	ZTH0145	SCA6	D-24-ZTH0145-SCA6
D24	296.296	75.8714	29.2288	15.7135	1.86011	0.646815	4.27496	1	D	24	ZTH0145	SCA6	D-24-ZTH0145-SCA6
D24	216.667	64.1094	24.5452	14.4871	1.69428	0.662458	1.02609	1	D	24	ZTH0145	SCA6	D-24-ZTH0145-SCA6
D24	223.457	57.1732	19.4047	15.9087	1.21976	0.859051	0.821608	1	D	24	ZTH0145	SCA6	D-24-ZTH0145-SCA6
D24	302.469	70.1252	26.1524	15.9087	1.64391	0.772934	5.32906	1	D	24	ZTH0145	SCA6	D-24-ZTH0145-SCA6
D24	356.79	80.3158	31.6228	15.1127	2.09246	0.695056	5.86521	1	D	24	ZTH0145	SCA6	D-24-ZTH0145-SCA6
D24	298.765	73.11	25.3372	16.6667	1.52023	0.702404	2.72171	1	D	24	ZTH0145	SCA6	D-24-ZTH0145-SCA6
D24	290.741	74.8393	30.2255	13.0052	2.3241	0.652314	6.22016	1	D	24	ZTH0145	SCA6	D-24-ZTH0145-SCA6
D24	243.827	60.9667	21.8299	16.178	1.34935	0.82434	2.85011	1	D	24	ZTH0145	SCA6	D-24-ZTH0145-SCA6
D24	179.012	54.4117	20.9644	13.5628	1.54572	0.759815	0.39493	1	D	24	ZTH0145	SCA6	D-24-ZTH0145-SCA6
D24	219.136	58.7445	22.2222	13.5628	1.63846	0.797974	0.563262	1	D	24	ZTH0145	SCA6	D-24-ZTH0145-SCA6
D24	177.16	55.2205	22.3607	11.4396	1.95467	0.730088	3.3447	1	D	24	ZTH0145	SCA6	D-24-ZTH0145-SCA6
D24	164.815	51.1574	18.4926	12.9577	1.42715	0.791389	0.896298	1	D	24	ZTH0145	SCA6	D-24-ZTH0145-SCA6
D24	256.173	66.3316	27.4424	12.9577	2.11785	0.731647	2.3332	1	D	24	ZTH0145	SCA6	D-24-ZTH0145-SCA6
D24	255.556	69.2047	27.7778	12.6686	2.19265	0.670538	1.35149	1	D	24	ZTH0145	SCA6	D-24-ZTH0145-SCA6
D48	374.074	74.1884	25.3372	20.7573	1.22064	0.854074	1.83759	1	D	48	ZTH0145	SCA6	D-48-ZTH0145-SCA6
D48	248.765	62.2685	21.5739	14.8241	1.45533	0.806238	3.3095	1	D	48	ZTH0145	SCA6	D-48-ZTH0145-SCA6
D48	198.765	61.6176	24.4697	13.3795	1.82889	0.657872	2.67271	1	D	48	ZTH0145	SCA6	D-48-ZTH0145-SCA6
D48	383.333	74.3001	24.037	22.4983	1.06839	0.872586	0.286331	1	D	48	ZTH0145	SCA6	D-48-ZTH0145-SCA6
D48	238.889	60.9667	21.3726	15.7135	1.36015	0.807644	1.10157	1	D	48	ZTH0145	SCA6	D-48-ZTH0145-SCA6
D48	255.556	62.5381	22.9061	14.4444	1.58581	0.821119	3.42497	1	D	48	ZTH0145	SCA6	D-48-ZTH0145-SCA6
D48	140.741	51.269	17.9161	10.4822	1.7092	0.672852	2.00959	1	D	48	ZTH0145	SCA6	D-48-ZTH0145-SCA6
D48	143.21	55.8714	20.9644	10.4822	2	0.576506	5.69027	1	D	48	ZTH0145	SCA6	D-48-ZTH0145-SCA6
D48	193.827	53.11	18.3249	13.7437	1.33333	0.863519	2.01848	1	D	48	ZTH0145	SCA6	D-48-ZTH0145-SCA6
D48	224.691	57.5544	20.3973	15.436	1.32141	0.852391	0.649789	1	D	48	ZTH0145	SCA6	D-48-ZTH0145-SCA6
D48	272.222	63.5702	23.4389	16.9604	1.38198	0.846498	0.477442	1	D	48	ZTH0145	SCA6	D-48-ZTH0145-SCA6
D48	203.704	58.4749	22.2222	12.6686	1.75412	0.748634	0.353518	1	D	48	ZTH0145	SCA6	D-48-ZTH0145-SCA6
D48	207.407	55.3322	19.1163	16.0247	1.19293	0.851291	0.692546	1	D	48	ZTH0145	SCA6	D-48-ZTH0145-SCA6
D48	110.494	41.7293	15.436	9.93808	1.55322	0.797382	1.4159	1	D	48	ZTH0145	SCA6	D-48-ZTH0145-SCA6
D48	237.654	63.1889	24.4697	13.3795	1.82889	0.747951	4.05264	1	D	48	ZTH0145	SCA6	D-48-ZTH0145-SCA6
D48	135.185	52.4591	18.4926	11.4396	1.61654	0.617301	4.28328	1	D	48	ZTH0145	SCA6	D-48-ZTH0145-SCA6
D48	133.951	47.0942	17.3561	11.8113	1.46945	0.758962	3.32922	1	D	48	ZTH0145	SCA6	D-48-ZTH0145-SCA6
D48	105.556	41.348	16.5179	8.46197	1.95201	0.775857	1.77527	1	D	48	ZTH0145	SCA6	D-48-ZTH0145-SCA6
D48	153.704	50.2369	18.4926	11.4396	1.61654	0.76533	2.00733	1	D	48	ZTH0145	SCA6	D-48-ZTH0145-SCA6
D48	145.062	48.9351	19.4365	9.93808	1.95576	0.761239	0.653833	1	D	48	ZTH0145	SCA6	D-48-ZTH0145-SCA6
D48	187.654	58.4749	23.544	10.5409	2.23358	0.689651	1.3911	1	D	48	ZTH0145	SCA6	D-48-ZTH0145-SCA6
D48	217.284	66.9825	27.4424	12.0185	2.28335	0.608576	0.73188	1	D	48	ZTH0145	SCA6	D-48-ZTH0145-SCA6
D48	229.012	58.7445	20.7573	16.178	1.28305	0.833939	1.47455	1	D	48	ZTH0145	SCA6	D-48-ZTH0145-SCA6
D48	300	75.3322	30.8721	13.9222	2.21747	0.664308	1.69129	1	D	48	ZTH0145	SCA6	D-48-ZTH0145-SCA6
D48	181.481	54.4117	20.3973	13.9222	1.46509	0.770295	1.05404	1	D	48	ZTH0145	SCA6	D-48-ZTH0145-SCA6
D48	269.136	71.9662	28.9742	14.4871	2	0.653017	2.84885	1	D	48	ZTH0145	SCA6	D-48-ZTH0145-SCA6
D0	65.4321	34.793	14.4871	5.55556	2.60768	0.67923	3.89509	2	D	0	ZTH0145	SCA6	D-0-ZTH0145-SCA6
D0	72.8395	40.5392	15.9087	5.66558	2.80796	0.556963	1.57232	2	D	0	ZTH0145	SCA6	D-0-ZTH0145-SCA6
D0	67.9012	32.5708	13.3795	7.11458	1.88058	0.804324	2.314	2	D	0	ZTH0145	SCA6	D-0-ZTH0145-SCA6
D0	63.5802	31.9199	12.9577	7.45356	1.73845	0.784167	1.12345	2	D	0	ZTH0145	SCA6	D-0-ZTH0145-SCA6
D0	81.4815	36.634	13.5628	8.01234	1.69274	0.762959	2.43133	2	D	0	ZTH0145	SCA6	D-0-ZTH0145-SCA6
D0	90.7407	41.7293	16.9239	7.45356	2.27059	0.654833	4.06094	2	D	0	ZTH0145	SCA6	D-0-ZTH0145-SCA6
D0	71.6049	36.0948	14.8241	5.66558	2.61652	0.69066	3.27001	2	D	0	ZTH0145	SCA6	D-0-ZTH0145-SCA6
D0	92.5926	45.1416	18.4926	6.47884	2.85431	0.570996	3.76256	2	D	0	ZTH0145	SCA6	D-0-ZTH0145-SCA6
D0	66.6667	39.7767	16.6667	5.55556	3	0.529495	6.07708	2	D	0	ZTH0145	SCA6	D-0-ZTH0145-SCA6
D0	106.173	45.5228	18.8889	7.45356	2.53421	0.64382	2.50005	2	D	0	ZTH0145	SCA6	D-0-ZTH0145-SCA6
D0	83.3333	39.507	16.0247	7.11458	2.25237	0.670933	0.540933	2	D	0	ZTH0145	SCA6	D-0-ZTH0145-SCA6
D0	80.2469	41.0784	17.3916	6.47884	2.68438	0.597601	3.81354	2	D	0	ZTH0145	SCA6	D-0-ZTH0145-SCA6
D0	74.0741	36.0948	13.7437	7.02728	1.95576	0.714476	3.29798	2	D	0	ZTH0145	SCA6	D-0-ZTH0145-SCA6
D0	63.5802	30.9994	10.4822	9.55814	1.09668	0.831428	1.82676	2	D	0	ZTH0145	SCA6	D-0-ZTH0145-SCA6
D0	75.9259	35.9831	13.5628	8.01234	1.69274	0.736891	0.417219	2	D	0	ZTH0145	SCA6	D-0-ZTH0145-SCA6
D0	82.0987	36.3644	14.1421	8.67805	1.62964	0.78018	1.75931	2	D	0	ZTH0145	SCA6	D-0-ZTH0145-SCA6
D0	79.6296	36.3644	13.9222	7.45356	1.86786	0.756716	0.260565	2	D	0	ZTH0145	SCA6	D-0-ZTH0145-SCA6
D0	33.9506	25.6345	10.9432	4.96904	2.20227	0.649243	0.376319	2	D	0	ZTH0145	SCA6	D-0-ZTH0145-SCA6
D0	31.4815	24.3328	9.55814	4.71404	2.02759	0.668162	0.719434	2	D	0	ZTH0145	SCA6	D-0-ZTH0145-SCA6
D0	58.642	36.7456	15.7135	4.58123	3.42997	0.545767	4.88363	2	D	0	ZTH0145	SCA6	D-0-ZTH0145-SCA6
D0	58.0247	40.1579	16.5179	5.98352	2.76056	0.452147	1.23642	2	D	0	ZTH0145	SCA6	D-0-ZTH0145-SCA6
D0	70.9876	35.9831	14.9485	6.28539	2.37829	0.688963	2.76778	2	D	0	ZTH0145	SCA6	D-0-ZTH0145-SCA6
D0	82.0987	38.2053	16.5179	6.28539	2.62798	0.706804	4.33249	2	D	0	ZTH0145	SCA6	D-0-ZTH0145-SCA6
D0	70.9876	35.4439	14.2292	8.01234	1.77591	0.710085	2.37969	2	D	0	ZTH0145	SCA6	D-0-ZTH0145-SCA6
D0	43.2099	30.3486	12.6686	4.71404	2.68742	0.589544	0.971671	2	D	0	ZTH0145	SCA6	D-0-ZTH0145-SCA6
D0	75.3086	37.0152	15.436	6.47884	2.38253	0.690707	1.98256	2	D	0	ZTH0145	SCA6	D-0-ZTH0145-SCA6
D0	44.4444	28.1263	11.8113	5.55556	2.12603	0.705994	0.504954	2	D	0	ZTH0145	SCA6	D-0-ZTH0145-SCA6
D0	111.111	43.3006	17.2491	8.08901	2.13241	0.744696	1.71541	2	D	0	ZTH0145	SCA6	D-0-ZTH0145-SCA6
D0	82.0987	43.9515	18.4926	6.47884	2.85431	0.534071	2.3189	2	D	0	ZTH0145	SCA6	D-0-ZTH0145-SCA6
D0	65.4321	40.6971	18.0876	5.55556	3.25576	0.496447	2.95353	2	D	0	ZTH0145	SCA6	D-0-ZTH0145-SCA6
D0	45.0617	30.079	12.4226	4.58123	2.71163	0.625881	2.38866	2	D	0	ZTH0145	SCA6	D-0-ZTH0145-SCA6
D0	48.1481	29.9673	11.4396	4.96904	2.30217	0.673743	1.92467	2	D	0	ZTH0145	SCA6	D-0-ZTH0145-SCA6
D0	77.7778	36.0948	14.1421	9.42809	1.5	0.7502	0.707592	2	D	0	ZTH0145	SCA6	D-0-ZTH0145-SCA6
D0	104.321	46.1737	18.9215	7.77778	2.43277	0.614882	4.78903	2	D	0	ZTH0145	SCA6	D-0-ZTH0145-SCA6
D0	54.321	30.3486	11.4396	6.47884	1.76569	0.741142	1.27714	2	D	0	ZTH0145	SCA6	D-0-ZTH0145-SCA6
D0	47.5309	29.6977	10.5409	5.98352	1.76166	0.677236	2.11765	2	D	0	ZTH0145	SCA6	D-0-ZTH0145-SCA6
D0	62.9629	36.0948	14.8241	5.66558	2.61652	0.607305	0.515866	2	D	0	ZTH0145	SCA6	D-0-ZTH0145-SCA6
D0	53.7037	28.7772	10.9432	7.45356	1.46818	0.814923	0.892629	2	D	0	ZTH0145	SCA6	D-0-ZTH0145-SCA6
D0	42.5926	25.2532	8.95806	6.47884	1.38267	0.839285	1.0188	2	D	0	ZTH0145	SCA6	D-0-ZTH0145-SCA6
D0	72.8395	36.634	14.4871	7.45356	1.94365	0.682039	0.492721	2	D	0	ZTH0145	SCA6	D-0-ZTH0145-SCA6
D0	62.9629	33.8725	13.5172	5.66558	2.38586	0.689604	0.640852	2	D	0	ZTH0145	SCA6	D-0-ZTH0145-SCA6
D0	74.6913	39.1258	16.6667	6.47884	2.57248	0.613132	1.77118	2	D	0	ZTH0145	SCA6	D-0-ZTH0145-SCA6
D0	106.173	46.8246	18.4926	8.95806	2.06435	0.608521	3.70255	2	D	0	ZTH0145	SCA6	D-0-ZTH0145-SCA6
D0	83.3333	38.2053	15.1127	8.01234	1.88619	0.717433	1.10788	2	D	0	ZTH0145	SCA6	D-0-ZTH0145-SCA6
D0	64.1975	38.8562	16.6667	5.55556	3	0.534328	2.54561	2	D	0	ZTH0145	SCA6	D-0-ZTH0145-SCA6
D0	74.0741	38.4749	15.7919	6.28539	2.51247	0.628812	2.98045	2	D	0	ZTH0145	SCA6	D-0-ZTH0145-SCA6
D0	69.7531	38.9678	15.9087	5.98352	2.65875	0.577245	3.8317	2	D	0	ZTH0145	SCA6	D-0-ZTH0145-SCA6
D0	85.1852	43.3006	18.4926	6.47884	2.85431	0.570934	0.21208	2	D	0	ZTH0145	SCA6	D-0-ZTH0145-SCA6
D0	62.3457	32.8404	12.4226	6.47884	1.91741	0.72644	1.25129	2	D	0	ZTH0145	SCA6	D-0-ZTH0145-SCA6
D24	109.259	43.9515	16.9604	8.95806	1.89331	0.710756	1.6656	2	D	24	ZTH0145	SCA6	D-24-ZTH0145-SCA6
D24	79.0123	38.8562	15.7919	7.85674	2.00997	0.657635	1.37087	2	D	24	ZTH0145	SCA6	D-24-ZTH0145-SCA6
D24	65.4321	33.4913	13.5628	6.47884	2.09341	0.733057	3.14186	2	D	24	ZTH0145	SCA6	D-24-ZTH0145-SCA6
D24	87.6543	45.1416	18.4926	7.11458	2.59925	0.540542	0.735768	2	D	24	ZTH0145	SCA6	D-24-ZTH0145-SCA6
D24	91.9753	40.4275	16.0247	7.11458	2.25237	0.707175	1.12004	2	D	24	ZTH0145	SCA6	D-24-ZTH0145-SCA6
D24	83.9506	42.3801	17.9161	6.47884	2.76533	0.587366	1.77664	2	D	24	ZTH0145	SCA6	D-24-ZTH0145-SCA6
D24	68.5185	35.4439	13.9222	7.45356	1.86786	0.685386	0.7512	2	D	24	ZTH0145	SCA6	D-24-ZTH0145-SCA6
D24	95.679	43.9515	18.3922	6.47884	2.83881	0.622414	4.23025	2	D	24	ZTH0145	SCA6	D-24-ZTH0145-SCA6
D24	155.556	54.9509	21.9989	9.42809	2.33333	0.647359	4.33427	2	D	24	ZTH0145	SCA6	D-24-ZTH0145-SCA6
D24	75.3086	34.793	13.4256	7.45356	1.80123	0.781755	2.32481	2	D	24	ZTH0145	SCA6	D-24-ZTH0145-SCA6
D24	95.679	41.348	15.1127	9.16246	1.64942	0.703263	1.72378	2	D	24	ZTH0145	SCA6	D-24-ZTH0145-SCA6
D24	81.4815	42.3801	17.5682	6.47884	2.71163	0.57009	2.2102	2	D	24	ZTH0145	SCA6	D-24-ZTH0145-SCA6
D24	70.9876	36.3644	14.9071	5.98352	2.49136	0.674591	3.28711	2	D	24	ZTH0145	SCA6	D-24-ZTH0145-SCA6
D24	54.9383	30.079	11.6003	5.66558	2.04751	0.763061	3.65335	2	D	24	ZTH0145	SCA6	D-24-ZTH0145-SCA6
D24	80.8642	45.2532	19.4047	5.98352	3.24303	0.496211	0.240709	2	D	24	ZTH0145	SCA6	D-24-ZTH0145-SCA6
D24	90.1234	44.2211	18.3922	5.98352	3.07381	0.579147	6.34028	2	D	24	ZTH0145	SCA6	D-24-ZTH0145-SCA6
D24	80.2469	39.2375	15.9087	6.75862	2.35384	0.654993	0.205645	2	D	24	ZTH0145	SCA6	D-24-ZTH0145-SCA6
D24	82.716	42.9193	18.2236	5.55556	3.28024	0.564278	3.99157	2	D	24	ZTH0145	SCA6	D-24-ZTH0145-SCA6
D24	146.914	48.6655	18.4926	10.4822	1.76419	0.779522	2.71574	2	D	24	ZTH0145	SCA6	D-24-ZTH0145-SCA6
D24	137.037	51.269	21.4591	8.46197	2.53595	0.655145	3.8132	2	D	24	ZTH0145	SCA6	D-24-ZTH0145-SCA6
D24	103.704	41.0784	15.7919	9.55814	1.65219	0.772284	1.33511	2	D	24	ZTH0145	SCA6	D-24-ZTH0145-SCA6
D24	91.9753	39.507	15.1127	8.01234	1.88619	0.740512	4.14935	2	D	24	ZTH0145	SCA6	D-24-ZTH0145-SCA6
D24	136.42	51.9199	20.4879	9.16246	2.23607	0.635944	1.19037	2	D	24	ZTH0145	SCA6	D-24-ZTH0145-SCA6
D24	86.4197	37.0152	14.4444	8.46197	1.70698	0.792614	0.543471	2	D	24	ZTH0145	SCA6	D-24-ZTH0145-SCA6
D24	120.37	46.1737	18.2236	9.55814	1.9066	0.709479	3.49844	2	D	24	ZTH0145	SCA6	D-24-ZTH0145-SCA6
D24	86.4197	38.8562	15.436	8.01234	1.92654	0.719288	3.40448	2	D	24	ZTH0145	SCA6	D-24-ZTH0145-SCA6
D24	130.247	48.3959	19.0192	8.95806	2.12313	0.69881	2.02983	2	D	24	ZTH0145	SCA6	D-24-ZTH0145-SCA6
D24	111.111	46.4433	19.7828	8.67805	2.27963	0.647323	0.746614	2	D	24	ZTH0145	SCA6	D-24-ZTH0145-SCA6
D24	59.8765	35.4439	14.6144	4.58123	3.19006	0.598941	5.36592	2	D	24	ZTH0145	SCA6	D-24-ZTH0145-SCA6
D24	78.395	40.8088	16.9239	7.02728	2.40832	0.591549	3.0919	2	D	24	ZTH0145	SCA6	D-24-ZTH0145-SCA6
D24	92.5926	43.6819	18.0876	6.75862	2.67622	0.609794	1.24377	2	D	24	ZTH0145	SCA6	D-24-ZTH0145-SCA6
D24	114.815	45.1416	18.2236	8.67805	2.09996	0.708034	0.894147	2	D	24	ZTH0145	SCA6	D-24-ZTH0145-SCA6
D24	58.0247	36.634	15.7919	5.55556	2.84253	0.543319	0.263506	2	D	24	ZTH0145	SCA6	D-24-ZTH0145-SCA6
D24	54.321	29.4281	11.4396	7.45356	1.53478	0.788231	0.699702	2	D	24	ZTH0145	SCA6	D-24-ZTH0145-SCA6
D24	84.5679	38.5866	15.1127	8.08901	1.86831	0.713745	0.984363	2	D	24	ZTH0145	SCA6	D-24-ZTH0145-SCA6
D24	136.42	52.0778	21.3726	8.95806	2.38586	0.632093	0.747066	2	D	24	ZTH0145	SCA6	D-24-ZTH0145-SCA6
D24	107.407	48.6655	18.4926	8.01234	2.30801	0.569903	5.98414	2	D	24	ZTH0145	SCA6	D-24-ZTH0145-SCA6
D24	111.111	45.9041	18.6256	8.08901	2.30258	0.662619	1.01206	2	D	24	ZTH0145	SCA6	D-24-ZTH0145-SCA6
D24	89.5062	37.2848	13.9222	8.95806	1.55415	0.809093	0.980407	2	D	24	ZTH0145	SCA6	D-24-ZTH0145-SCA6
D24	119.136	46.1737	18.4926	9.55814	1.93475	0.702203	3.82748	2	D	24	ZTH0145	SCA6	D-24-ZTH0145-SCA6
D24	125.926	49.9673	19.4047	8.46197	2.29317	0.633802	2.26115	2	D	24	ZTH0145	SCA6	D-24-ZTH0145-SCA6
D24	85.8025	38.2053	14.9485	7.11458	2.1011	0.73869	2.25682	2	D	24	ZTH0145	SCA6	D-24-ZTH0145-SCA6
D24	89.5062	41.348	16.4054	8.46197	1.93872	0.657891	0.204332	2	D	24	ZTH0145	SCA6	D-24-ZTH0145-SCA6
D24	107.407	45.9041	18.3249	8.08901	2.26541	0.640532	1.38481	2	D	24	ZTH0145	SCA6	D-24-ZTH0145-SCA6
D24	157.407	53.7609	21.5739	11.1111	1.94165	0.684388	0.712953	2	D	24	ZTH0145	SCA6	D-24-ZTH0145-SCA6
D24	106.173	41.9989	16.6667	8.67805	1.92055	0.756394	0.505536	2	D	24	ZTH0145	SCA6	D-24-ZTH0145-SCA6
D24	70.3704	34.793	13.4256	8.46197	1.58658	0.730492	1.01486	2	D	24	ZTH0145	SCA6	D-24-ZTH0145-SCA6
D24	90.1234	38.8562	15.7135	7.85674	2	0.750114	2.8113	2	D	24	ZTH0145	SCA6	D-24-ZTH0145-SCA6
D24	98.1481	40.8088	15.9087	7.85674	2.02485	0.740601	4.50965	2	D	24	ZTH0145	SCA6	D-24-ZTH0145-SCA6
D24	117.284	46.4433	17.3916	9.93808	1.75	0.683285	4.20336	2	D	24	ZTH0145	SCA6	D-24-ZTH0145-SCA6
D24	125.309	46.1737	17.9505	9.49334	1.89086	0.738586	1.33247	2	D	24	ZTH0145	SCA6	D-24-ZTH0145-SCA6
D24	101.852	39.8883	14.4444	9.49334	1.52154	0.804428	1.85803	2	D	24	ZTH0145	SCA6	D-24-ZTH0145-SCA6
D24	147.531	48.9351	19.4365	10.4822	1.85424	0.774196	1.24255	2	D	24	ZTH0145	SCA6	D-24-ZTH0145-SCA6
D24	156.79	55.3322	21.3726	9.93808	2.15058	0.643536	4.08778	2	D	24	ZTH0145	SCA6	D-24-ZTH0145-SCA6
D24	82.0987	37.2848	15.1127	8.01234	1.88619	0.742134	0.898423	2	D	24	ZTH0145	SCA6	D-24-ZTH0145-SCA6
D24	128.395	47.7451	19.6576	10.2439	1.91895	0.707785	1.25732	2	D	24	ZTH0145	SCA6	D-24-ZTH0145-SCA6
D24	91.9753	43.5702	17.3561	7.11458	2.43951	0.608838	1.37663	2	D	24	ZTH0145	SCA6	D-24-ZTH0145-SCA6
D24	69.1358	34.4117	13.9222	6.47884	2.14887	0.733668	0.713725	2	D	24	ZTH0145	SCA6	D-24-ZTH0145-SCA6
D24	88.2716	37.2848	14.4871	8.01234	1.8081	0.797933	0.941633	2	D	24	ZTH0145	SCA6	D-24-ZTH0145-SCA6
D24	51.2346	29.6977	11.8113	5.55556	2.12603	0.730008	0.920775	2	D	24	ZTH0145	SCA6	D-24-ZTH0145-SCA6
D24	102.469	45.5228	19.4047	7.45356	2.60342	0.621361	1.62566	2	D	24	ZTH0145	SCA6	D-24-ZTH0145-SCA6
D24	70.3704	35.7135	12.9577	8.01234	1.61722	0.693322	3.12385	2	D	24	ZTH0145	SCA6	D-24-ZTH0145-SCA6
D24	135.185	51.1574	21.2277	9.42809	2.25154	0.649116	2.671	2	D	24	ZTH0145	SCA6	D-24-ZTH0145-SCA6
D24	137.037	51.8082	21.3726	8.95806	2.38586	0.641579	1.44322	2	D	24	ZTH0145	SCA6	D-24-ZTH0145-SCA6
D24	129.63	52.1895	22.4983	8.46197	2.65875	0.598064	4.53809	2	D	24	ZTH0145	SCA6	D-24-ZTH0145-SCA6
D24	87.6543	41.0784	17.5682	7.11458	2.46932	0.652764	1.07837	2	D	24	ZTH0145	SCA6	D-24-ZTH0145-SCA6
D24	91.358	40.5392	15.9087	7.45356	2.13437	0.698564	3.40252	2	D	24	ZTH0145	SCA6	D-24-ZTH0145-SCA6
D24	139.506	47.3638	18.4926	10.4822	1.76419	0.781466	1.38043	2	D	24	ZTH0145	SCA6	D-24-ZTH0145-SCA6
D24	111.728	42.6497	16.4054	8.95806	1.83135	0.771863	2.07729	2	D	24	ZTH0145	SCA6	D-24-ZTH0145-SCA6
D48	105.556	41.7293	15.7135	8.95806	1.75412	0.761744	1.36844	2	D	48	ZTH0145	SCA6	D-48-ZTH0145-SCA6
D48	158.025	49.0468	19.1163	12.0185	1.59057	0.825493	1.28946	2	D	48	ZTH0145	SCA6	D-48-ZTH0145-SCA6
D48	108.642	44.2211	18.4926	8.95806	2.06435	0.69815	0.801424	2	D	48	ZTH0145	SCA6	D-48-ZTH0145-SCA6
D48	115.432	44.872	18.4926	8.95806	2.06435	0.720421	2.29048	2	D	48	ZTH0145	SCA6	D-48-ZTH0145-SCA6
D48	84.5679	41.348	16.6667	7.11458	2.34261	0.621593	2.18073	2	D	48	ZTH0145	SCA6	D-48-ZTH0145-SCA6
D48	93.2099	37.2848	13.3795	9.42809	1.41912	0.842573	1.2085	2	D	48	ZTH0145	SCA6	D-48-ZTH0145-SCA6
D48	162.346	52.4591	20.6679	11.1111	1.86011	0.741325	0.652812	2	D	48	ZTH0145	SCA6	D-48-ZTH0145-SCA6
D48	120.988	43.3006	15.9087	10.2439	1.55299	0.810891	0.046216	2	D	48	ZTH0145	SCA6	D-48-ZTH0145-SCA6
D48	113.58	44.2211	16.9239	8.46197	2	0.729884	2.9323	2	D	48	ZTH0145	SCA6	D-48-ZTH0145-SCA6
D48	161.111	50.2369	18.4926	12.0185	1.53868	0.802213	2.43954	2	D	48	ZTH0145	SCA6	D-48-ZTH0145-SCA6
D48	83.9506	37.0152	14.4871	8.01234	1.8081	0.769968	3.15942	2	D	48	ZTH0145	SCA6	D-48-ZTH0145-SCA6
D48	72.8395	33.4913	12.4226	8.95806	1.38675	0.816045	0.889094	2	D	48	ZTH0145	SCA6	D-48-ZTH0145-SCA6
D48	67.9012	32.5708	12.0185	8.01234	1.5	0.804324	2.31323	2	D	48	ZTH0145	SCA6	D-48-ZTH0145-SCA6
D48	135.802	47.7451	18.8889	9.93808	1.90066	0.748618	1.35169	2	D	48	ZTH0145	SCA6	D-48-ZTH0145-SCA6
D48	169.753	52.8404	20.4275	12.5708	1.625	0.764004	0.678264	2	D	48	ZTH0145	SCA6	D-48-ZTH0145-SCA6
D48	141.358	46.1737	17.9505	10.9432	1.64034	0.833183	0.918549	2	D	48	ZTH0145	SCA6	D-48-ZTH0145-SCA6
D48	90.7407	40.4275	16.5179	7.85674	2.10238	0.697682	0.399283	2	D	48	ZTH0145	SCA6	D-48-ZTH0145-SCA6
D48	101.852	38.9678	14.2292	11.1111	1.28062	0.84288	1.12399	2	D	48	ZTH0145	SCA6	D-48-ZTH0145-SCA6
D48	112.346	43.3006	16.9604	8.95806	1.89331	0.75297	1.67247	2	D	48	ZTH0145	SCA6	D-48-ZTH0145-SCA6
D48	94.4444	40.8088	15.1127	8.67805	1.74149	0.712654	0.620815	2	D	48	ZTH0145	SCA6	D-48-ZTH0145-SCA6
D48	71.6049	35.7135	14.4871	6.47884	2.23607	0.705486	2.63762	2	D	48	ZTH0145	SCA6	D-48-ZTH0145-SCA6
D48	62.3457	33.2217	13.4256	6.47884	2.07222	0.709861	1.61531	2	D	48	ZTH0145	SCA6	D-48-ZTH0145-SCA6
D48	97.5308	41.0784	16.4054	8.95806	1.83135	0.726315	1.42484	2	D	48	ZTH0145	SCA6	D-48-ZTH0145-SCA6
D48	70.9876	35.4439	13.4256	7.45356	1.80123	0.710085	2.0224	2	D	48	ZTH0145	SCA6	D-48-ZTH0145-SCA6
D48	109.877	44.6024	17.5682	9.49334	1.85058	0.694063	1.21634	2	D	48	ZTH0145	SCA6	D-48-ZTH0145-SCA6
D48	66.6667	36.0948	15.476	5.98352	2.58644	0.643029	1.5476	2	D	48	ZTH0145	SCA6	D-48-ZTH0145-SCA6
D48	112.963	46.1737	18.9867	8.46197	2.24376	0.665819	1.64985	2	D	48	ZTH0145	SCA6	D-48-ZTH0145-SCA6
D48	97.5308	45.5228	18.9215	7.85674	2.40832	0.591416	1.73938	2	D	48	ZTH0145	SCA6	D-48-ZTH0145-SCA6
D48	59.8765	30.9994	12.4226	7.45356	1.66667	0.782995	0.888889	2	D	48	ZTH0145	SCA6	D-48-ZTH0145-SCA6
D48	88.8889	39.2375	15.7135	6.75862	2.32495	0.725531	3.83701	2	D	48	ZTH0145	SCA6	D-48-ZTH0145-SCA6
D48	158.642	50.6182	19.4365	12.9577	1.5	0.778064	1.79124	2	D	48	ZTH0145	SCA6	D-48-ZTH0145-SCA6
D48	48.1481	27.2059	9.55814	8.01234	1.19293	0.817456	0.659502	2	D	48	ZTH0145	SCA6	D-48-ZTH0145-SCA6
D48	98.7654	40.6971	15.7919	8.01234	1.97094	0.749354	3.69006	2	D	48	ZTH0145	SCA6	D-48-ZTH0145-SCA6
D48	80.2469	37.0152	14.9485	7.85674	1.90263	0.735999	3.38083	2	D	48	ZTH0145	SCA6	D-48-ZTH0145-SCA6
D48	70.9876	37.2848	15.9087	6.47884	2.45549	0.641694	0.634643	2	D	48	ZTH0145	SCA6	D-48-ZTH0145-SCA6
D48	75.3086	39.7767	16.5179	6.28539	2.62798	0.598134	3.40983	2	D	48	ZTH0145	SCA6	D-48-ZTH0145-SCA6
D48	31.4815	24.3328	10.2439	4.71404	2.17307	0.668162	0.510289	2	D	48	ZTH0145	SCA6	D-48-ZTH0145-SCA6
D48	73.4568	38.5866	15.9087	6.47884	2.45549	0.619968	1.97873	2	D	48	ZTH0145	SCA6	D-48-ZTH0145-SCA6
D48	78.395	39.507	16.178	7.02728	2.30217	0.631174	4.29197	2	D	48	ZTH0145	SCA6	D-48-ZTH0145-SCA6
D48	94.4444	41.7293	16.5179	8.08901	2.04201	0.681561	0.299739	2	D	48	ZTH0145	SCA6	D-48-ZTH0145-SCA6
D48	83.9506	37.9357	15.1127	8.08901	1.86831	0.733056	0.656876	2	D	48	ZTH0145	SCA6	D-48-ZTH0145-SCA6
D48	125.309	43.031	15.476	10.5409	1.46818	0.850408	1.22302	2	D	48	ZTH0145	SCA6	D-48-ZTH0145-SCA6
D48	61.7284	30.3486	11.1111	8.01234	1.38675	0.842206	0.772993	2	D	48	ZTH0145	SCA6	D-48-ZTH0145-SCA6
D48	86.4197	37.9357	15.1127	8.01234	1.88619	0.754617	0.510394	2	D	48	ZTH0145	SCA6	D-48-ZTH0145-SCA6
D48	62.9629	33.4913	13.5628	7.11458	1.90634	0.705394	0.213675	2	D	48	ZTH0145	SCA6	D-48-ZTH0145-SCA6
D48	115.432	48.0147	20.0308	8.95806	2.23607	0.6292	4.42977	2	D	48	ZTH0145	SCA6	D-48-ZTH0145-SCA6
D48	157.407	50.6182	20.0308	10.5409	1.90029	0.772009	3.11265	2	D	48	ZTH0145	SCA6	D-48-ZTH0145-SCA6
D48	93.8271	40.1579	16.5179	8.08901	2.04201	0.731132	0.077641	2	D	48	ZTH0145	SCA6	D-48-ZTH0145-SCA6
D48	65.4321	35.1743	14.4444	5.98352	2.41404	0.664585	3.13965	2	D	48	ZTH0145	SCA6	D-48-ZTH0145-SCA6
D48	66.6667	33.8725	13.4256	7.45356	1.80123	0.730169	1.79899	2	D	48	ZTH0145	SCA6	D-48-ZTH0145-SCA6
D48	59.2592	33.4913	13.3795	6.28539	2.12867	0.663901	0.777667	2	D	48	ZTH0145	SCA6	D-48-ZTH0145-SCA6
D48	129.63	49.0468	20.4879	8.08901	2.5328	0.677162	2.03867	2	D	48	ZTH0145	SCA6	D-48-ZTH0145-SCA6
D48	111.728	50.2369	20.9644	7.45356	2.81267	0.556324	1.60971	2	D	48	ZTH0145	SCA6	D-48-ZTH0145-SCA6
D48	87.6543	44.6024	17.5682	5.98352	2.9361	0.553691	3.50495	2	D	48	ZTH0145	SCA6	D-48-ZTH0145-SCA6
D48	109.259	50.2369	20.9644	8.01234	2.61652	0.54403	3.26173	2	D	48	ZTH0145	SCA6	D-48-ZTH0145-SCA6
D48	70.3704	37.9357	15.7135	6.28539	2.5	0.614474	2.34857	2	D	48	ZTH0145	SCA6	D-48-ZTH0145-SCA6
D48	103.086	41.7293	16.4054	8.95806	1.83135	0.743926	1.04397	2	D	48	ZTH0145	SCA6	D-48-ZTH0145-SCA6
D48	70.9876	35.4439	13.7437	7.02728	1.95576	0.710085	0.974968	2	D	48	ZTH0145	SCA6	D-48-ZTH0145-SCA6
D48	62.3457	34.1421	13.7437	5.66558	2.42582	0.672101	2.05866	2	D	48	ZTH0145	SCA6	D-48-ZTH0145-SCA6
D48	101.852	44.872	18.2236	8.67805	2.09996	0.635665	0.235969	2	D	48	ZTH0145	SCA6	D-48-ZTH0145-SCA6
D48	75.3086	39.7767	16.6667	5.55556	3	0.598134	3.34844	2	D	48	ZTH0145	SCA6	D-48-ZTH0145-SCA6
D0	169.136	53.11	19.8762	12.4226	1.6	0.753517	1.99552	3	D	0	ZTH0145	SCA6	D-0-ZTH0145-SCA6
D0	192.593	56.2527	21.3726	12.4226	1.72046	0.764827	1.28841	3	D	0	ZTH0145	SCA6	D-0-ZTH0145-SCA6
D0	108.025	45.7924	19.4365	8.01234	2.42582	0.647359	0.365348	3	D	0	ZTH0145	SCA6	D-0-ZTH0145-SCA6
D0	158.025	49.9673	18.4926	12.0185	1.53868	0.795359	2.05048	3	D	0	ZTH0145	SCA6	D-0-ZTH0145-SCA6
D0	225.926	58.4749	20.6679	15.1127	1.36758	0.830303	2.95718	3	D	0	ZTH0145	SCA6	D-0-ZTH0145-SCA6
D0	105.556	41.7293	15.436	8.95806	1.72315	0.761744	1.3163	3	D	0	ZTH0145	SCA6	D-0-ZTH0145-SCA6
D0	101.852	42.6497	17.3561	7.85674	2.20907	0.703632	2.56092	3	D	0	ZTH0145	SCA6	D-0-ZTH0145-SCA6
D0	132.716	47.4755	18.9215	10.2439	1.8471	0.739937	2.06659	3	D	0	ZTH0145	SCA6	D-0-ZTH0145-SCA6
D0	145.062	52.4591	21.0818	9.49334	2.2207	0.662401	0.943183	3	D	0	ZTH0145	SCA6	D-0-ZTH0145-SCA6
D0	131.481	48.3959	19.4047	9.16246	2.11785	0.705434	1.57267	3	D	0	ZTH0145	SCA6	D-0-ZTH0145-SCA6
D0	151.235	52.4591	20.4275	10.9432	1.86669	0.690588	2.72537	3	D	0	ZTH0145	SCA6	D-0-ZTH0145-SCA6
D0	125.309	50.6182	21.0818	8.08901	2.60623	0.61458	2.35355	3	D	0	ZTH0145	SCA6	D-0-ZTH0145-SCA6
D0	203.086	59.1258	22.3607	13.4256	1.66552	0.730024	1.82778	3	D	0	ZTH0145	SCA6	D-0-ZTH0145-SCA6
D0	138.272	53.11	21.5739	9.16246	2.3546	0.616014	4.68416	3	D	0	ZTH0145	SCA6	D-0-ZTH0145-SCA6
D0	158.642	53.7609	21.0818	9.49334	2.2207	0.689756	4.13049	3	D	0	ZTH0145	SCA6	D-0-ZTH0145-SCA6
D0	167.901	55.3322	22.3607	10.9432	2.04334	0.68914	1.10305	3	D	0	ZTH0145	SCA6	D-0-ZTH0145-SCA6
D0	138.272	49.0468	18.6256	9.49334	1.96197	0.722306	1.8807	3	D	0	ZTH0145	SCA6	D-0-ZTH0145-SCA6
D0	187.654	54.9509	20.7573	13.7437	1.51031	0.780941	0.683313	3	D	0	ZTH0145	SCA6	D-0-ZTH0145-SCA6
D0	90.7407	39.507	15.436	8.01234	1.92654	0.730572	0.182265	3	D	0	ZTH0145	SCA6	D-0-ZTH0145-SCA6
D0	119.136	47.0942	17.2491	10.2439	1.68383	0.675021	3.1717	3	D	0	ZTH0145	SCA6	D-0-ZTH0145-SCA6
D0	127.778	44.872	16.6667	11.1111	1.5	0.797471	0.809368	3	D	0	ZTH0145	SCA6	D-0-ZTH0145-SCA6
D0	96.9136	42.1105	16.178	8.08901	2	0.686772	3.52018	3	D	0	ZTH0145	SCA6	D-0-ZTH0145-SCA6
D0	123.457	44.6024	16.178	10.5409	1.53478	0.779846	1.79637	3	D	0	ZTH0145	SCA6	D-0-ZTH0145-SCA6
D0	180.864	55.0626	22.4983	12.0185	1.87197	0.749633	1.56093	3	D	0	ZTH0145	SCA6	D-0-ZTH0145-SCA6
D0	120.988	43.3006	16.9239	9.49334	1.78272	0.810891	1.28908	3	D	0	ZTH0145	SCA6	D-0-ZTH0145-SCA6
D0	119.753	52.1895	21.8863	8.46197	2.58644	0.552497	1.78294	3	D	0	ZTH0145	SCA6	D-0-ZTH0145-SCA6
D0	118.518	45.5228	17.5682	9.49334	1.85058	0.718683	1.04093	3	D	0	ZTH0145	SCA6	D-0-ZTH0145-SCA6
D0	148.148	48.6655	18.4926	10.4822	1.76419	0.786073	2.09152	3	D	0	ZTH0145	SCA6	D-0-ZTH0145-SCA6
D0	101.235	41.0784	15.9087	8.08901	1.9667	0.753896	1.05388	3	D	0	ZTH0145	SCA6	D-0-ZTH0145-SCA6
D0	169.136	57.5544	23.3598	10.9432	2.13464	0.641635	1.86922	3	D	0	ZTH0145	SCA6	D-0-ZTH0145-SCA6
D0	142.593	52.4591	20.4879	11.1111	1.84391	0.651126	1.67477	3	D	0	ZTH0145	SCA6	D-0-ZTH0145-SCA6
D0	133.951	46.1737	16.5179	11.967	1.38028	0.789523	0.338868	3	D	0	ZTH0145	SCA6	D-0-ZTH0145-SCA6
D0	127.16	44.6024	16.0247	11.1111	1.44222	0.803242	1.03522	3	D	0	ZTH0145	SCA6	D-0-ZTH0145-SCA6
D0	61.1111	30.9994	11.8113	7.11458	1.66015	0.799139	2.98996	3	D	0	ZTH0145	SCA6	D-0-ZTH0145-SCA6
D0	143.827	48.0147	18.4926	11.4396	1.61654	0.783976	1.11505	3	D	0	ZTH0145	SCA6	D-0-ZTH0145-SCA6
D0	56.7901	33.4913	14.2292	5.55556	2.56125	0.636238	2.63664	3	D	0	ZTH0145	SCA6	D-0-ZTH0145-SCA6
D0	129.63	48.6655	19.1163	10.4822	1.82369	0.687814	2.97232	3	D	0	ZTH0145	SCA6	D-0-ZTH0145-SCA6
D0	151.235	49.3164	19.1163	12.0185	1.59057	0.781408	1.68812	3	D	0	ZTH0145	SCA6	D-0-ZTH0145-SCA6
D0	125.309	46.1737	18.2236	11.1111	1.64012	0.738586	1.62763	3	D	0	ZTH0145	SCA6	D-0-ZTH0145-SCA6
D0	183.333	53.3796	19.4047	12.4226	1.56205	0.808539	2.24546	3	D	0	ZTH0145	SCA6	D-0-ZTH0145-SCA6
D0	105.556	43.031	16.8142	7.85674	2.14009	0.716354	2.71677	3	D	0	ZTH0145	SCA6	D-0-ZTH0145-SCA6
D0	104.321	42.6497	16.6667	8.01234	2.08013	0.72069	3.94116	3	D	0	ZTH0145	SCA6	D-0-ZTH0145-SCA6
D24	151.852	52.7287	21.9145	8.95806	2.44635	0.686334	4.09576	3	D	24	ZTH0145	SCA6	D-24-ZTH0145-SCA6
D24	100.617	44.4907	18.4926	7.11458	2.59925	0.638769	2.33551	3	D	24	ZTH0145	SCA6	D-24-ZTH0145-SCA6
D24	146.914	46.8246	16.5179	13.3795	1.23456	0.842023	0.769245	3	D	24	ZTH0145	SCA6	D-24-ZTH0145-SCA6
D24	88.2716	42.1105	16.9967	6.75862	2.51482	0.625531	1.58421	3	D	24	ZTH0145	SCA6	D-24-ZTH0145-SCA6
D24	81.4815	37.9357	15.476	7.02728	2.20227	0.711496	2.81382	3	D	24	ZTH0145	SCA6	D-24-ZTH0145-SCA6
D24	258.025	61.9989	21.5739	14.8241	1.45533	0.843536	2.5431	3	D	24	ZTH0145	SCA6	D-24-ZTH0145-SCA6
D24	163.58	55.6018	21.9145	11.4396	1.91568	0.66491	1.44202	3	D	24	ZTH0145	SCA6	D-24-ZTH0145-SCA6
D24	96.9136	41.7293	16.9604	8.01234	2.11678	0.699379	1.46351	3	D	24	ZTH0145	SCA6	D-24-ZTH0145-SCA6
D24	127.16	47.7451	19.4365	9.93808	1.95576	0.700979	2.4513	3	D	24	ZTH0145	SCA6	D-24-ZTH0145-SCA6
D24	145.062	48.0147	18.4926	10.4822	1.76419	0.790706	0.26261	3	D	24	ZTH0145	SCA6	D-24-ZTH0145-SCA6
D24	207.407	67.3638	27.7778	10.2439	2.71163	0.574356	1.44043	3	D	24	ZTH0145	SCA6	D-24-ZTH0145-SCA6
D24	64.1975	31.6503	11.967	7.02728	1.70294	0.805327	1.86558	3	D	24	ZTH0145	SCA6	D-24-ZTH0145-SCA6
D24	150.617	51.269	20.1231	8.95806	2.24636	0.720069	5.52108	3	D	24	ZTH0145	SCA6	D-24-ZTH0145-SCA6
D24	128.395	50.8878	20.9644	8.95806	2.34028	0.623062	2.65543	3	D	24	ZTH0145	SCA6	D-24-ZTH0145-SCA6
D24	104.321	46.1737	19.4365	7.45356	2.60768	0.614882	4.65842	3	D	24	ZTH0145	SCA6	D-24-ZTH0145-SCA6
D24	91.9753	40.8088	15.7135	7.85674	2	0.694022	4.67271	3	D	24	ZTH0145	SCA6	D-24-ZTH0145-SCA6
D24	91.358	37.0152	13.7437	8.08901	1.69906	0.837907	2.17038	3	D	24	ZTH0145	SCA6	D-24-ZTH0145-SCA6
D24	83.3333	35.4439	12.6686	9.55814	1.32543	0.833578	2.16932	3	D	24	ZTH0145	SCA6	D-24-ZTH0145-SCA6
D24	119.753	44.6024	17.5682	9.49334	1.85058	0.756451	1.20901	3	D	24	ZTH0145	SCA6	D-24-ZTH0145-SCA6
D24	99.3827	40.8088	15.476	8.46197	1.82889	0.749917	3.58067	3	D	24	ZTH0145	SCA6	D-24-ZTH0145-SCA6
D24	91.9753	38.2053	15.1127	8.01234	1.88619	0.791833	3.36058	3	D	24	ZTH0145	SCA6	D-24-ZTH0145-SCA6
D24	93.8271	40.1579	16.0247	8.95806	1.78885	0.731132	0.588625	3	D	24	ZTH0145	SCA6	D-24-ZTH0145-SCA6
D24	100	41.4597	16.9239	8.46197	2	0.731068	1.15946	3	D	24	ZTH0145	SCA6	D-24-ZTH0145-SCA6
D24	95.679	42.1105	16.178	8.08901	2	0.678023	3.08714	3	D	24	ZTH0145	SCA6	D-24-ZTH0145-SCA6
D24	102.469	44.2211	16.6667	9.55814	1.74371	0.658482	2.53585	3	D	24	ZTH0145	SCA6	D-24-ZTH0145-SCA6
D24	67.2839	35.0626	13.9222	6.47884	2.14887	0.687754	1.38813	3	D	24	ZTH0145	SCA6	D-24-ZTH0145-SCA6
D24	106.173	40.1579	15.7919	9.55814	1.65219	0.827334	1.45979	3	D	24	ZTH0145	SCA6	D-24-ZTH0145-SCA6
D24	108.642	45.5228	17.9505	8.46197	2.12132	0.658793	3.22355	3	D	24	ZTH0145	SCA6	D-24-ZTH0145-SCA6
D24	114.198	44.872	17.9161	8.95806	2	0.712716	1.49883	3	D	24	ZTH0145	SCA6	D-24-ZTH0145-SCA6
D24	90.7407	37.2848	14.4871	8.95806	1.61722	0.820253	1.88425	3	D	24	ZTH0145	SCA6	D-24-ZTH0145-SCA6
D24	88.8889	39.2375	16.0247	8.01234	2	0.725531	1.844	3	D	24	ZTH0145	SCA6	D-24-ZTH0145-SCA6
D24	55.5555	29.4281	10.9432	7.45356	1.46818	0.806145	0.910998	3	D	24	ZTH0145	SCA6	D-24-ZTH0145-SCA6
D24	113.58	45.5228	18.2236	8.67805	2.09996	0.688738	1.14459	3	D	24	ZTH0145	SCA6	D-24-ZTH0145-SCA6
D24	111.728	42.6497	17.5682	8.67805	2.02444	0.771863	0.619279	3	D	24	ZTH0145	SCA6	D-24-ZTH0145-SCA6
D24	90.1234	38.8562	14.4871	8.01234	1.8081	0.750114	0.544648	3	D	24	ZTH0145	SCA6	D-24-ZTH0145-SCA6
D24	93.8271	40.5392	16.178	7.02728	2.30217	0.717444	3.07377	3	D	24	ZTH0145	SCA6	D-24-ZTH0145-SCA6
D24	100.617	41.7293	17.3916	8.46197	2.05527	0.726107	0.654689	3	D	24	ZTH0145	SCA6	D-24-ZTH0145-SCA6
D24	43.2099	26.2854	9.93808	6.47884	1.53393	0.785894	1.09362	3	D	24	ZTH0145	SCA6	D-24-ZTH0145-SCA6
D24	95.679	40.4275	15.1127	9.55814	1.58114	0.735652	1.688	3	D	24	ZTH0145	SCA6	D-24-ZTH0145-SCA6
D24	59.8765	34.1421	13.5628	6.47884	2.09341	0.645484	1.16977	3	D	24	ZTH0145	SCA6	D-24-ZTH0145-SCA6
D24	100.617	41.7293	16.9239	8.46197	2	0.726107	0.706061	3	D	24	ZTH0145	SCA6	D-24-ZTH0145-SCA6
D24	94.4444	39.507	14.9071	8.95806	1.6641	0.760391	1.27794	3	D	24	ZTH0145	SCA6	D-24-ZTH0145-SCA6
D24	58.642	30.9994	10.5409	8.08901	1.30312	0.766851	1.60149	3	D	24	ZTH0145	SCA6	D-24-ZTH0145-SCA6
D24	90.1234	41.0784	16.6667	7.11458	2.34261	0.671152	1.33082	3	D	24	ZTH0145	SCA6	D-24-ZTH0145-SCA6
D48	113.58	45.5228	18.9215	9.42809	2.00693	0.688738	0.774992	3	D	48	ZTH0145	SCA6	D-48-ZTH0145-SCA6
D48	115.432	42.6497	16.5179	9.49334	1.73994	0.79745	0.468238	3	D	48	ZTH0145	SCA6	D-48-ZTH0145-SCA6
D48	70.9876	33.2217	12.6686	7.02728	1.80278	0.808258	1.92412	3	D	48	ZTH0145	SCA6	D-48-ZTH0145-SCA6
D48	124.691	42.3801	15.9087	10.9432	1.45375	0.872411	1.66596	3	D	48	ZTH0145	SCA6	D-48-ZTH0145-SCA6
D48	140.123	47.0942	16.9967	11.3312	1.5	0.793937	1.48284	3	D	48	ZTH0145	SCA6	D-48-ZTH0145-SCA6
D48	125.926	43.3006	15.9087	10.9432	1.45375	0.843989	0.66689	3	D	48	ZTH0145	SCA6	D-48-ZTH0145-SCA6
D48	95.679	41.7293	16.0247	8.95806	1.78885	0.69047	2.13624	3	D	48	ZTH0145	SCA6	D-48-ZTH0145-SCA6
D48	141.358	47.0942	18.2236	11.1111	1.64012	0.800932	0.851114	3	D	48	ZTH0145	SCA6	D-48-ZTH0145-SCA6
D48	135.802	45.5228	17.3916	11.4396	1.5203	0.823491	0.31765	3	D	48	ZTH0145	SCA6	D-48-ZTH0145-SCA6
D48	130.247	49.3164	19.6889	10.5409	1.86786	0.672968	3.22616	3	D	48	ZTH0145	SCA6	D-48-ZTH0145-SCA6
D48	65.4321	32.5708	12.0185	8.01234	1.5	0.775076	2.24267	3	D	48	ZTH0145	SCA6	D-48-ZTH0145-SCA6
D48	163.58	58.2053	22.3607	9.93808	2.25	0.606758	0.884173	3	D	48	ZTH0145	SCA6	D-48-ZTH0145-SCA6
D48	149.383	49.586	18.2236	10.2439	1.77896	0.76347	0.052029	3	D	48	ZTH0145	SCA6	D-48-ZTH0145-SCA6
D48	120.988	44.2211	16.5179	10.2439	1.61245	0.777485	1.47048	3	D	48	ZTH0145	SCA6	D-48-ZTH0145-SCA6
D48	42.5926	28.7772	11.8113	6.28539	1.87916	0.646318	0.4531	3	D	48	ZTH0145	SCA6	D-48-ZTH0145-SCA6
D48	113.58	43.3006	16.178	10.5409	1.53478	0.761245	1.33312	3	D	48	ZTH0145	SCA6	D-48-ZTH0145-SCA6
D48	113.58	44.6024	17.5682	9.55814	1.83804	0.717458	1.48373	3	D	48	ZTH0145	SCA6	D-48-ZTH0145-SCA6
D48	117.901	44.872	17.9161	9.93808	1.80278	0.735831	0.940801	3	D	48	ZTH0145	SCA6	D-48-ZTH0145-SCA6
D48	190.123	55.3322	21.2277	11.8113	1.79724	0.78035	2.47226	3	D	48	ZTH0145	SCA6	D-48-ZTH0145-SCA6
D48	72.8395	33.8725	12.0185	9.55814	1.25741	0.797777	1.69835	3	D	48	ZTH0145	SCA6	D-48-ZTH0145-SCA6
D48	57.4074	30.079	10.4822	8.01234	1.30826	0.797356	2.04823	3	D	48	ZTH0145	SCA6	D-48-ZTH0145-SCA6
D48	81.4815	38.8562	15.9087	7.45356	2.13437	0.678186	1.01241	3	D	48	ZTH0145	SCA6	D-48-ZTH0145-SCA6
D48	87.037	36.7456	13.9222	8.95806	1.55415	0.810033	0.49369	3	D	48	ZTH0145	SCA6	D-48-ZTH0145-SCA6
D48	101.235	43.3006	16.6667	8.67805	1.92055	0.678501	0.511445	3	D	48	ZTH0145	SCA6	D-48-ZTH0145-SCA6
D48	127.16	47.7451	19.7828	10.2439	1.93117	0.700979	1.37026	3	D	48	ZTH0145	SCA6	D-48-ZTH0145-SCA6
D48	90.1234	40.1579	15.476	8.46197	1.82889	0.702272	2.04303	3	D	48	ZTH0145	SCA6	D-48-ZTH0145-SCA6
D48	142.593	49.3164	19.4365	11.4396	1.69906	0.736756	1.65381	3	D	48	ZTH0145	SCA6	D-48-ZTH0145-SCA6
D48	108.025	41.7293	16.4054	8.95806	1.83135	0.779563	2.99009	3	D	48	ZTH0145	SCA6	D-48-ZTH0145-SCA6
D48	103.086	44.3328	17.5682	8.08901	2.17186	0.659116	3.12271	3	D	48	ZTH0145	SCA6	D-48-ZTH0145-SCA6
D48	116.049	43.6819	17.3561	10.2439	1.69428	0.764275	2.55489	3	D	48	ZTH0145	SCA6	D-48-ZTH0145-SCA6
D48	136.42	46.1737	17.3561	11.8113	1.46945	0.804077	1.04923	3	D	48	ZTH0145	SCA6	D-48-ZTH0145-SCA6
D48	103.086	41.7293	17.3916	8.46197	2.05527	0.743926	2.42109	3	D	48	ZTH0145	SCA6	D-48-ZTH0145-SCA6
D48	82.0987	38.5866	14.4871	7.11458	2.03626	0.692905	0.6728	3	D	48	ZTH0145	SCA6	D-48-ZTH0145-SCA6
D48	117.901	44.872	18.3922	9.49334	1.93738	0.735831	1.48918	3	D	48	ZTH0145	SCA6	D-48-ZTH0145-SCA6
D48	66.6667	40.5392	15.9087	5.66558	2.80796	0.509763	0.449425	3	D	48	ZTH0145	SCA6	D-48-ZTH0145-SCA6
D48	77.7778	36.634	13.3795	7.11458	1.88058	0.728279	0.979788	3	D	48	ZTH0145	SCA6	D-48-ZTH0145-SCA6
D48	84.5679	38.5866	14.0546	8.08901	1.73749	0.713745	1.7435	3	D	48	ZTH0145	SCA6	D-48-ZTH0145-SCA6
D48	164.197	49.0468	16.4054	13.9222	1.17836	0.857738	1.41451	3	D	48	ZTH0145	SCA6	D-48-ZTH0145-SCA6
D48	141.975	49.9673	18.8889	10.4822	1.802	0.71458	1.11165	3	D	48	ZTH0145	SCA6	D-48-ZTH0145-SCA6
D48	78.395	37.2848	15.1127	7.11458	2.12419	0.708654	0.634084	3	D	48	ZTH0145	SCA6	D-48-ZTH0145-SCA6
D48	169.753	50.6182	19.6576	12.5708	1.56375	0.832558	2.12589	3	D	48	ZTH0145	SCA6	D-48-ZTH0145-SCA6
D48	104.321	43.9515	17.9505	8.46197	2.12132	0.678632	2.06983	3	D	48	ZTH0145	SCA6	D-48-ZTH0145-SCA6
D48	95.0617	40.1579	16.178	8.08901	2	0.740752	2.20698	3	D	48	ZTH0145	SCA6	D-48-ZTH0145-SCA6
D48	119.753	45.5228	17.3916	9.93808	1.75	0.726169	4.20553	3	D	48	ZTH0145	SCA6	D-48-ZTH0145-SCA6
D48	108.025	41.7293	14.9071	10.9432	1.36223	0.779563	2.23469	3	D	48	ZTH0145	SCA6	D-48-ZTH0145-SCA6
D48	40.1234	24.3328	8.95806	6.47884	1.38267	0.851579	1.795	3	D	48	ZTH0145	SCA6	D-48-ZTH0145-SCA6
L0	103.086	43.9515	18.3922	7.45356	2.46757	0.670601	1.40106	1	L	0	GH8	SCA6	L-0-GH8-SCA6
L0	115.432	42.1105	15.1127	12.6686	1.19293	0.818003	1.04164	1	L	0	GH8	SCA6	L-0-GH8-SCA6
L0	89.5062	42.1105	17.2491	7.02728	2.45459	0.63428	2.89492	1	L	0	GH8	SCA6	L-0-GH8-SCA6
L0	125.926	41.9989	14.0546	11.967	1.17444	0.897118	1.38428	1	L	0	GH8	SCA6	L-0-GH8-SCA6
L0	102.469	44.2211	17.5682	8.95806	1.96116	0.658482	1.09982	1	L	0	GH8	SCA6	L-0-GH8-SCA6
L0	125.309	43.031	15.1127	11.1111	1.36015	0.850408	0.748302	1	L	0	GH8	SCA6	L-0-GH8-SCA6
L0	126.543	47.0942	19.4365	8.95806	2.16972	0.716991	2.99588	1	L	0	GH8	SCA6	L-0-GH8-SCA6
L0	227.778	60.9667	22.6623	14.8241	1.52875	0.770079	0.925267	1	L	0	GH8	SCA6	L-0-GH8-SCA6
L0	223.457	57.5544	20.3973	15.436	1.32141	0.847707	1.68767	1	L	0	GH8	SCA6	L-0-GH8-SCA6
L0	171.605	50.5065	16.9967	14.8241	1.14656	0.845367	1.20356	1	L	0	GH8	SCA6	L-0-GH8-SCA6
L0	150.617	50.8878	18.4926	10.4822	1.76419	0.7309	2.60021	1	L	0	GH8	SCA6	L-0-GH8-SCA6
L0	198.765	53.6492	19.4365	12.9577	1.5	0.867809	0.800383	1	L	0	GH8	SCA6	L-0-GH8-SCA6
L0	109.259	40.8088	15.7919	10.2439	1.54158	0.824443	1.1139	1	L	0	GH8	SCA6	L-0-GH8-SCA6
L0	172.222	51.1574	18.0876	13.5172	1.33811	0.826957	2.71825	1	L	0	GH8	SCA6	L-0-GH8-SCA6
L0	205.556	59.1258	21.3437	14.2292	1.5	0.738899	2.14325	1	L	0	GH8	SCA6	L-0-GH8-SCA6
L0	272.222	69.4743	28.3932	13.9222	2.03942	0.708736	1.23736	1	L	0	GH8	SCA6	L-0-GH8-SCA6
L0	139.506	51.8082	16.9967	10.2439	1.6592	0.653139	2.96194	1	L	0	GH8	SCA6	L-0-GH8-SCA6
L0	204.938	56.7919	20.8759	12.4226	1.68048	0.798473	0.962977	1	L	0	GH8	SCA6	L-0-GH8-SCA6
L0	130.864	55.3322	20.7573	9.55814	2.17169	0.537124	3.42446	1	L	0	GH8	SCA6	L-0-GH8-SCA6
L0	174.691	58.2053	23.7528	9.16246	2.59241	0.647972	5.31936	1	L	0	GH8	SCA6	L-0-GH8-SCA6
L0	334.568	74.1884	27.2392	16.9967	1.60261	0.763875	5.01294	1	L	0	GH8	SCA6	L-0-GH8-SCA6
L0	197.531	54.0305	19.1807	13.5172	1.41898	0.850291	0.449735	1	L	0	GH8	SCA6	L-0-GH8-SCA6
L0	206.79	57.824	21.3726	13.5172	1.58114	0.777182	3.94598	1	L	0	GH8	SCA6	L-0-GH8-SCA6
L0	109.259	40.8088	15.7919	10.2439	1.54158	0.824443	1.90977	1	L	0	GH8	SCA6	L-0-GH8-SCA6
L0	191.975	60.0463	23.7528	10.2439	2.31872	0.669088	2.01939	1	L	0	GH8	SCA6	L-0-GH8-SCA6
L0	139.506	49.9673	18.3922	9.93808	1.85068	0.702153	3.79437	1	L	0	GH8	SCA6	L-0-GH8-SCA6
L0	174.074	56.2527	21.8863	10.9432	2	0.691285	1.21219	1	L	0	GH8	SCA6	L-0-GH8-SCA6
L0	153.704	51.1574	20.1231	11.1665	1.80209	0.738036	3.00975	1	L	0	GH8	SCA6	L-0-GH8-SCA6
L0	282.716	66.6012	24.5955	15.476	1.58927	0.800932	2.44266	1	L	0	GH8	SCA6	L-0-GH8-SCA6
L0	166.049	51.1574	17.5682	13.5628	1.29532	0.797317	0.967152	1	L	0	GH8	SCA6	L-0-GH8-SCA6
L0	155.556	48.6655	16.0247	13.5628	1.18151	0.825377	3.54864	1	L	0	GH8	SCA6	L-0-GH8-SCA6
L0	358.025	75.3322	25.3616	20.3973	1.24338	0.792796	5.55073	1	L	0	GH8	SCA6	L-0-GH8-SCA6
L0	113.58	43.3006	16.9239	9.49334	1.78272	0.761245	0.646329	1	L	0	GH8	SCA6	L-0-GH8-SCA6
L0	238.272	67.903	27.4424	11.967	2.29317	0.649388	1.60455	1	L	0	GH8	SCA6	L-0-GH8-SCA6
L0	161.728	50.8878	19.1807	11.3312	1.69274	0.784819	1.76732	1	L	0	GH8	SCA6	L-0-GH8-SCA6
L0	220.988	61.6176	22.3607	13.9222	1.60612	0.731422	2.24681	1	L	0	GH8	SCA6	L-0-GH8-SCA6
L0	105.556	39.507	14.2292	10.2439	1.38903	0.849849	0.498163	1	L	0	GH8	SCA6	L-0-GH8-SCA6
L0	189.506	55.6018	20.9644	12.0185	1.74434	0.770292	1.2223	1	L	0	GH8	SCA6	L-0-GH8-SCA6
L0	222.839	67.2521	27.9771	12.2726	2.27963	0.619142	5.41625	1	L	0	GH8	SCA6	L-0-GH8-SCA6
L0	118.518	44.2211	16.6667	9.55814	1.74371	0.761618	1.07	1	L	0	GH8	SCA6	L-0-GH8-SCA6
L0	152.469	52.4591	20.8759	9.93808	2.1006	0.696225	4.04956	1	L	0	GH8	SCA6	L-0-GH8-SCA6
L0	61.1111	42.6497	18.4926	5.55556	3.32866	0.422179	0.692503	1	L	0	GH8	SCA6	L-0-GH8-SCA6
L24	237.037	65.5228	25.0678	11.3312	2.21229	0.69381	6.69906	1	L	24	GH8	SCA6	L-24-GH8-SCA6
L24	222.222	62.5381	23.8566	12.9577	1.84112	0.714017	2.87851	1	L	24	GH8	SCA6	L-24-GH8-SCA6
L24	170.988	54.6813	21.3726	12.4226	1.72046	0.718615	1.34392	1	L	24	GH8	SCA6	L-24-GH8-SCA6
L24	148.148	49.2047	18.8889	9.93808	1.90066	0.768939	3.30142	1	L	24	GH8	SCA6	L-24-GH8-SCA6
L24	296.914	66.7129	22.2222	18.2236	1.21942	0.83834	3.68034	1	L	24	GH8	SCA6	L-24-GH8-SCA6
L24	343.21	74.5697	29.1653	15.7919	1.84686	0.775613	2.04383	1	L	24	GH8	SCA6	L-24-GH8-SCA6
L24	324.074	84.8065	34.6054	12.5708	2.75284	0.566233	4.30762	1	L	24	GH8	SCA6	L-24-GH8-SCA6
L24	340.741	73.6492	25.652	17.5682	1.46014	0.789402	3.20603	1	L	24	GH8	SCA6	L-24-GH8-SCA6
L24	183.951	65.1416	25.9391	10.9994	2.35823	0.544747	5.86262	1	L	24	GH8	SCA6	L-24-GH8-SCA6
L24	218.518	62.5381	24.6707	12.2726	2.01022	0.702116	3.33486	1	L	24	GH8	SCA6	L-24-GH8-SCA6
L24	227.16	61.2363	21.8299	16.178	1.34935	0.761245	1.08753	1	L	24	GH8	SCA6	L-24-GH8-SCA6
L24	236.42	73.7609	29.9176	10.2439	2.92052	0.546062	7.43181	1	L	24	GH8	SCA6	L-24-GH8-SCA6
L24	195.062	62.5381	23.3598	10.9432	2.13464	0.626748	3.48409	1	L	24	GH8	SCA6	L-24-GH8-SCA6
L24	187.654	56.2527	21.8863	12.4226	1.76182	0.745216	2.73894	1	L	24	GH8	SCA6	L-24-GH8-SCA6
L24	260.494	65.6808	24.5452	15.5952	1.5739	0.758806	1.68295	1	L	24	GH8	SCA6	L-24-GH8-SCA6
L24	370.988	81.5059	30.3478	15.476	1.96096	0.701764	3.61369	1	L	24	GH8	SCA6	L-24-GH8-SCA6
L24	192.593	57.1732	21.5739	12.0185	1.79506	0.740398	2.61385	1	L	24	GH8	SCA6	L-24-GH8-SCA6
L24	208.025	55.9831	20.0308	14.4871	1.38267	0.834087	1.25718	1	L	24	GH8	SCA6	L-24-GH8-SCA6
L24	295.062	65.6808	21.5739	18.0876	1.19274	0.859501	1.62561	1	L	24	GH8	SCA6	L-24-GH8-SCA6
L24	201.235	57.5544	22.3607	14.9071	1.5	0.763405	1.5595	1	L	24	GH8	SCA6	L-24-GH8-SCA6
L24	194.444	57.824	21.3726	13.5172	1.58114	0.730783	0.148124	1	L	24	GH8	SCA6	L-24-GH8-SCA6
L24	209.259	67.6334	27.7778	11.6003	2.39457	0.574873	1.79159	1	L	24	GH8	SCA6	L-24-GH8-SCA6
L24	258.642	65.4112	24.037	16.0247	1.5	0.759635	2.56937	1	L	24	GH8	SCA6	L-24-GH8-SCA6
L24	246.296	60.0463	21.4591	16.5179	1.29915	0.858412	0.952564	1	L	24	GH8	SCA6	L-24-GH8-SCA6
L24	270.988	63.7281	22.1387	16.178	1.36844	0.838488	0.15327	1	L	24	GH8	SCA6	L-24-GH8-SCA6
L24	212.346	61.2363	22.9061	14.8241	1.5452	0.711598	0.621422	1	L	24	GH8	SCA6	L-24-GH8-SCA6
L24	154.321	55.7135	22.6623	9.16246	2.47339	0.624761	1.51456	1	L	24	GH8	SCA6	L-24-GH8-SCA6
L24	85.1852	44.6024	18.3922	7.45356	2.46757	0.538094	1.83237	1	L	24	GH8	SCA6	L-24-GH8-SCA6
L24	121.605	43.9515	16.6667	11.1111	1.5	0.791068	1.46899	1	L	24	GH8	SCA6	L-24-GH8-SCA6
L24	140.123	47.0942	17.5682	11.6003	1.51446	0.793937	0.982924	1	L	24	GH8	SCA6	L-24-GH8-SCA6
L24	274.691	65.7924	22.3607	18.3922	1.21577	0.797449	1.9841	1	L	24	GH8	SCA6	L-24-GH8-SCA6
L48	182.716	52.7287	18.0876	14.6144	1.23766	0.825833	1.53263	1	L	48	GH8	SCA6	L-48-GH8-SCA6
L48	237.654	60.9667	22.8792	14.9071	1.53478	0.80347	2.52219	1	L	48	GH8	SCA6	L-48-GH8-SCA6
L48	117.901	46.7129	18.3249	9.16246	2	0.678976	1.43946	1	L	48	GH8	SCA6	L-48-GH8-SCA6
L48	212.346	58.4749	20.7573	15.1127	1.37349	0.780395	0.311146	1	L	48	GH8	SCA6	L-48-GH8-SCA6
L48	296.914	72.9983	28.1091	14.0546	2	0.700187	5.80414	1	L	48	GH8	SCA6	L-48-GH8-SCA6
L48	238.889	64.1094	23.2007	14.0546	1.65076	0.730402	4.60149	1	L	48	GH8	SCA6	L-48-GH8-SCA6
L48	249.383	62.5381	23.4389	15.436	1.51845	0.801285	1.71077	1	L	48	GH8	SCA6	L-48-GH8-SCA6
L48	194.444	67.0942	29.4182	9.16246	3.21074	0.542795	1.16961	1	L	48	GH8	SCA6	L-48-GH8-SCA6
L48	214.815	65.1416	26.8742	10.4822	2.56379	0.636147	6.69618	1	L	48	GH8	SCA6	L-48-GH8-SCA6
L48	322.839	75.2205	29.3342	15.9087	1.84391	0.717007	5.0802	1	L	48	GH8	SCA6	L-48-GH8-SCA6
L48	250	65.7924	24.3939	13.9222	1.75216	0.725768	1.48255	1	L	48	GH8	SCA6	L-48-GH8-SCA6
L48	337.037	72.3474	26.3406	17.3916	1.51456	0.809173	5.10525	1	L	48	GH8	SCA6	L-48-GH8-SCA6
L48	238.272	70.8878	25.652	15.1127	1.69738	0.595854	2.78857	1	L	48	GH8	SCA6	L-48-GH8-SCA6
L48	90.1234	40.6971	16.9604	6.47884	2.61781	0.683786	3.69494	1	L	48	GH8	SCA6	L-48-GH8-SCA6
L48	239.506	59.3954	18.9867	17.5682	1.08074	0.853142	1.66904	1	L	48	GH8	SCA6	L-48-GH8-SCA6
L48	270.988	68.0147	25.772	13.5172	1.9066	0.736129	2.82715	1	L	48	GH8	SCA6	L-48-GH8-SCA6
L48	393.21	91.8545	35.2942	15.436	2.28648	0.585644	5.14241	1	L	48	GH8	SCA6	L-48-GH8-SCA6
L48	408.642	84.7603	32.6788	16.5179	1.97839	0.714773	3.44946	1	L	48	GH8	SCA6	L-48-GH8-SCA6
L48	254.938	62.8077	21.0818	16.5179	1.27631	0.812119	3.85546	1	L	48	GH8	SCA6	L-48-GH8-SCA6
L48	245.679	63.8398	23.8566	15.436	1.54551	0.757521	1.38603	1	L	48	GH8	SCA6	L-48-GH8-SCA6
L48	333.333	79.0141	30.3274	15.7135	1.93003	0.670933	4.95932	1	L	48	GH8	SCA6	L-48-GH8-SCA6
L48	187.654	60.3158	24.6707	11.1665	2.20934	0.648195	1.44358	1	L	48	GH8	SCA6	L-48-GH8-SCA6
L48	168.518	68.0147	29.0806	7.85674	3.70135	0.457775	4.04341	1	L	48	GH8	SCA6	L-48-GH8-SCA6
L48	349.383	74.5697	27.1257	17.5682	1.54402	0.789563	1.95021	1	L	48	GH8	SCA6	L-48-GH8-SCA6
L48	262.963	68.8235	27.2392	15.9087	1.71222	0.69764	0.675634	1	L	48	GH8	SCA6	L-48-GH8-SCA6
L48	291.358	65.6808	21.2277	19.0192	1.11612	0.848712	0.546914	1	L	48	GH8	SCA6	L-48-GH8-SCA6
L48	339.506	76.7919	29.9176	16.9239	1.76777	0.723481	4.8089	1	L	48	GH8	SCA6	L-48-GH8-SCA6
L48	130.247	47.4755	17.9161	8.95806	2	0.726171	3.1578	1	L	48	GH8	SCA6	L-48-GH8-SCA6
L0	120.988	46.4433	18.2236	9.55814	1.9066	0.704862	1.31172	2	L	0	GH8	SCA6	L-0-GH8-SCA6
L0	50	28.7772	10.4822	6.47884	1.61791	0.758721	1.33747	2	L	0	GH8	SCA6	L-0-GH8-SCA6
L0	97.5308	41.0784	16.6667	8.67805	1.92055	0.726315	1.4516	2	L	0	GH8	SCA6	L-0-GH8-SCA6
L0	198.148	60.0463	22.4983	12.0185	1.87197	0.690602	4.00663	2	L	0	GH8	SCA6	L-0-GH8-SCA6
L0	111.111	42.3801	15.7919	10.2439	1.54158	0.777396	2.03267	2	L	0	GH8	SCA6	L-0-GH8-SCA6
L0	119.753	43.3006	16.9604	10.4822	1.61802	0.802617	2.11992	2	L	0	GH8	SCA6	L-0-GH8-SCA6
L0	85.1852	39.2375	15.7919	7.85674	2.00997	0.6953	0.69194	2	L	0	GH8	SCA6	L-0-GH8-SCA6
L0	120.37	46.7129	16.0247	10.4822	1.52875	0.693195	4.05382	2	L	0	GH8	SCA6	L-0-GH8-SCA6
L0	50.6173	31.6503	12.9577	4.96904	2.60768	0.634969	2.37016	2	L	0	GH8	SCA6	L-0-GH8-SCA6
L0	82.716	36.634	13.5628	8.01234	1.69274	0.774519	1.33586	2	L	0	GH8	SCA6	L-0-GH8-SCA6
L0	109.877	41.0784	15.476	9.49334	1.6302	0.818253	1.21228	2	L	0	GH8	SCA6	L-0-GH8-SCA6
L0	94.4444	40.8088	15.7919	10.2439	1.54158	0.712654	0.892384	2	L	0	GH8	SCA6	L-0-GH8-SCA6
L0	224.691	71.9662	21.0818	17.5682	1.2	0.545179	1.52879	2	L	0	GH8	SCA6	L-0-GH8-SCA6
L0	112.346	43.3006	16.5179	9.49334	1.73994	0.75297	1.3156	2	L	0	GH8	SCA6	L-0-GH8-SCA6
L0	66.0494	31.5386	11.3312	9.16246	1.23669	0.834435	1.10299	2	L	0	GH8	SCA6	L-0-GH8-SCA6
L0	79.0123	37.9357	15.7135	7.85674	2	0.689935	1.34817	2	L	0	GH8	SCA6	L-0-GH8-SCA6
L0	110.494	42.6497	16.0247	10.4822	1.52875	0.763334	3.675	2	L	0	GH8	SCA6	L-0-GH8-SCA6
L0	151.235	51.5386	19.6889	10.5409	1.86786	0.715476	2.26647	2	L	0	GH8	SCA6	L-0-GH8-SCA6
L0	75.3086	37.0152	15.476	7.02728	2.20227	0.690707	0.698817	2	L	0	GH8	SCA6	L-0-GH8-SCA6
L0	174.691	51.1574	16.9604	13.9222	1.21823	0.838813	0.71306	2	L	0	GH8	SCA6	L-0-GH8-SCA6
L0	106.173	41.9989	16.0247	9.55814	1.67655	0.756394	1.61955	2	L	0	GH8	SCA6	L-0-GH8-SCA6
L0	138.272	51.427	20.6679	8.67805	2.38162	0.656993	0.770999	2	L	0	GH8	SCA6	L-0-GH8-SCA6
L0	59.8765	30.079	10.5409	7.02728	1.5	0.83165	2.38721	2	L	0	GH8	SCA6	L-0-GH8-SCA6
L0	171.605	54.9509	21.5739	12.4226	1.73666	0.71415	1.71746	2	L	0	GH8	SCA6	L-0-GH8-SCA6
L0	140.123	45.7924	16.9604	11.4396	1.4826	0.839717	1.4364	2	L	0	GH8	SCA6	L-0-GH8-SCA6
L0	188.272	54.6813	19.4047	13.7437	1.4119	0.791255	1.85758	2	L	0	GH8	SCA6	L-0-GH8-SCA6
L0	198.148	56.9036	21.8299	12.6686	1.72315	0.768991	1.33356	2	L	0	GH8	SCA6	L-0-GH8-SCA6
L0	124.691	44.6024	16.9239	9.93808	1.70294	0.787645	3.17841	2	L	0	GH8	SCA6	L-0-GH8-SCA6
L0	150.617	49.9673	18.8889	11.4396	1.65119	0.758077	1.70978	2	L	0	GH8	SCA6	L-0-GH8-SCA6
L0	120.37	44.872	15.476	13.0052	1.18998	0.751241	3.1149	2	L	0	GH8	SCA6	L-0-GH8-SCA6
L0	136.42	47.0942	18.4926	10.4822	1.76419	0.772952	0.352213	2	L	0	GH8	SCA6	L-0-GH8-SCA6
L0	96.2963	38.8562	14.9071	8.95806	1.6641	0.801492	1.83884	2	L	0	GH8	SCA6	L-0-GH8-SCA6
L0	108.642	42.3801	15.7135	8.95806	1.75412	0.760121	0.41831	2	L	0	GH8	SCA6	L-0-GH8-SCA6
L0	104.321	41.7293	16.5179	8.67805	1.90341	0.752835	0.340467	2	L	0	GH8	SCA6	L-0-GH8-SCA6
L0	156.173	48.7772	17.3561	14.2292	1.21976	0.824862	1.19125	2	L	0	GH8	SCA6	L-0-GH8-SCA6
L0	41.358	30.6182	12.9577	4.00617	3.23443	0.554385	4.35581	2	L	0	GH8	SCA6	L-0-GH8-SCA6
L0	127.778	47.0942	18.8889	9.93808	1.90066	0.723986	2.62299	2	L	0	GH8	SCA6	L-0-GH8-SCA6
L0	160.494	49.586	16.5179	11.967	1.38028	0.820257	3.77301	2	L	0	GH8	SCA6	L-0-GH8-SCA6
L0	113.58	42.9193	16.0247	8.95806	1.78885	0.77483	1.35643	2	L	0	GH8	SCA6	L-0-GH8-SCA6
L0	262.346	63.1889	21.3437	17.3561	1.22975	0.82566	1.93499	2	L	0	GH8	SCA6	L-0-GH8-SCA6
L0	61.1111	32.8404	12.6686	6.47884	1.95538	0.712055	2.51878	2	L	0	GH8	SCA6	L-0-GH8-SCA6
L0	166.049	51.1574	18.8889	12.4226	1.52053	0.797317	3.14043	2	L	0	GH8	SCA6	L-0-GH8-SCA6
L0	103.086	46.1737	19.4365	8.01234	2.42582	0.607605	3.98951	2	L	0	GH8	SCA6	L-0-GH8-SCA6
L0	222.222	66.062	26.2232	12.6686	2.06993	0.639872	4.62658	2	L	0	GH8	SCA6	L-0-GH8-SCA6
L0	90.1234	38.8562	14.8241	9.16246	1.61791	0.750114	1.1638	2	L	0	GH8	SCA6	L-0-GH8-SCA6
L0	88.2716	43.031	17.9505	7.02728	2.55441	0.599056	1.9169	2	L	0	GH8	SCA6	L-0-GH8-SCA6
L0	100	41.4597	16.9239	8.46197	2	0.731068	0.516783	2	L	0	GH8	SCA6	L-0-GH8-SCA6
L0	151.852	53.11	20.0308	9.49334	2.10999	0.676515	2.27104	2	L	0	GH8	SCA6	L-0-GH8-SCA6
L0	87.037	37.2848	14.2292	8.67805	1.63967	0.786773	1.18206	2	L	0	GH8	SCA6	L-0-GH8-SCA6
L0	85.8025	43.4123	18.0876	5.66558	3.19254	0.572116	3.96931	2	L	0	GH8	SCA6	L-0-GH8-SCA6
L0	61.7284	33.4913	13.5628	5.55556	2.44131	0.691563	1.88455	2	L	0	GH8	SCA6	L-0-GH8-SCA6
L0	74.0741	34.793	13.0052	8.08901	1.60776	0.768939	0.612183	2	L	0	GH8	SCA6	L-0-GH8-SCA6
L0	53.0864	28.5076	10.4822	8.01234	1.30826	0.820865	0.823738	2	L	0	GH8	SCA6	L-0-GH8-SCA6
L0	120.37	44.872	16.6667	9.55814	1.74371	0.751241	2.29216	2	L	0	GH8	SCA6	L-0-GH8-SCA6
L0	87.6543	40.5392	15.9087	6.75862	2.35384	0.670244	3.87212	2	L	0	GH8	SCA6	L-0-GH8-SCA6
L0	72.2222	33.2217	12.0185	8.01234	1.5	0.822315	2.86878	2	L	0	GH8	SCA6	L-0-GH8-SCA6
L24	156.173	51.1574	19.4365	11.4396	1.69906	0.749892	1.90273	2	L	24	GH8	SCA6	L-24-GH8-SCA6
L24	119.753	41.9989	15.1127	10.4822	1.44175	0.853142	1.62048	2	L	24	GH8	SCA6	L-24-GH8-SCA6
L24	214.815	58.317	20.3973	15.436	1.32141	0.793751	2.6983	2	L	24	GH8	SCA6	L-24-GH8-SCA6
L24	216.667	59.1258	22.1387	14.0546	1.5752	0.77884	0.750318	2	L	24	GH8	SCA6	L-24-GH8-SCA6
L24	179.63	53.7609	20.4275	12.5708	1.625	0.781008	0.999603	2	L	24	GH8	SCA6	L-24-GH8-SCA6
L24	187.654	53.4913	20.6679	13.5628	1.52386	0.824143	1.26393	2	L	24	GH8	SCA6	L-24-GH8-SCA6
L24	155.556	54.9509	22.9061	8.67805	2.63955	0.647359	4.733	2	L	24	GH8	SCA6	L-24-GH8-SCA6
L24	383.333	85.0299	33.4258	16.178	2.06612	0.666259	3.07341	2	L	24	GH8	SCA6	L-24-GH8-SCA6
L24	201.235	55.8714	18.4926	15.436	1.19801	0.81009	1.86293	2	L	24	GH8	SCA6	L-24-GH8-SCA6
L24	160.494	50.1252	16.8142	13.5172	1.2439	0.802704	2.76936	2	L	24	GH8	SCA6	L-24-GH8-SCA6
L24	375.926	76.141	26.1524	20.4879	1.27648	0.814845	1.63864	2	L	24	GH8	SCA6	L-24-GH8-SCA6
L24	152.469	48.0147	17.2491	10.5409	1.63639	0.831082	0.633616	2	L	24	GH8	SCA6	L-24-GH8-SCA6
L24	45.679	29.4281	12.0185	6.47884	1.85504	0.66283	0.308303	2	L	24	GH8	SCA6	L-24-GH8-SCA6
L24	115.432	41.7293	15.7919	10.2439	1.54158	0.833019	0.458377	2	L	24	GH8	SCA6	L-24-GH8-SCA6
L24	164.815	58.2053	23.8566	8.95806	2.66314	0.611337	4.15471	2	L	24	GH8	SCA6	L-24-GH8-SCA6
L24	155.556	49.586	16.6667	12.6686	1.31559	0.795018	0.204678	2	L	24	GH8	SCA6	L-24-GH8-SCA6
L24	198.148	54.3001	19.1163	13.5628	1.40946	0.844499	2.14076	2	L	24	GH8	SCA6	L-24-GH8-SCA6
L24	183.951	57.0152	21.3726	11.4396	1.86831	0.711098	6.16578	2	L	24	GH8	SCA6	L-24-GH8-SCA6
L24	227.778	65.5691	25.5797	12.0185	2.12836	0.665768	4.64083	2	L	24	GH8	SCA6	L-24-GH8-SCA6
L24	201.852	57.824	19.6576	13.3795	1.46923	0.758623	0.904076	2	L	24	GH8	SCA6	L-24-GH8-SCA6
L24	235.185	60.5855	21.8299	14.8241	1.4726	0.805162	0.755976	2	L	24	GH8	SCA6	L-24-GH8-SCA6
L24	90.7407	37.2848	13.3795	8.67805	1.54177	0.820253	1.75962	2	L	24	GH8	SCA6	L-24-GH8-SCA6
L24	224.691	59.3954	21.8863	13.4256	1.6302	0.80037	2.50579	2	L	24	GH8	SCA6	L-24-GH8-SCA6
L24	279.63	69.4743	26.2232	13.5628	1.93346	0.728021	3.73008	2	L	24	GH8	SCA6	L-24-GH8-SCA6
L24	141.358	51.1574	19.8762	8.95806	2.2188	0.678756	3.81892	2	L	24	GH8	SCA6	L-24-GH8-SCA6
L24	83.9506	34.4117	11.6003	9.49334	1.22195	0.890883	1.85207	2	L	24	GH8	SCA6	L-24-GH8-SCA6
L24	135.185	45.2532	15.476	11.967	1.29322	0.829544	2.32401	2	L	24	GH8	SCA6	L-24-GH8-SCA6
L24	37.037	26.2854	10.5409	4.58123	2.3009	0.673623	0.883708	2	L	24	GH8	SCA6	L-24-GH8-SCA6
L24	53.7037	32.3012	12.9577	5.55556	2.33238	0.646811	2.23967	2	L	24	GH8	SCA6	L-24-GH8-SCA6
L24	72.8395	34.793	13.3795	7.85674	1.70294	0.756124	0.281548	2	L	24	GH8	SCA6	L-24-GH8-SCA6
L24	87.6543	37.9357	14.4871	8.01234	1.8081	0.765397	2.52384	2	L	24	GH8	SCA6	L-24-GH8-SCA6
L24	109.259	48.3959	20.3973	7.45356	2.73658	0.586206	1.26175	2	L	24	GH8	SCA6	L-24-GH8-SCA6
L24	99.3827	42.6497	16.6667	8.67805	1.92055	0.686575	1.60659	2	L	24	GH8	SCA6	L-24-GH8-SCA6
L24	52.4691	27.4755	9.55814	7.11458	1.34346	0.873421	0.58684	2	L	24	GH8	SCA6	L-24-GH8-SCA6
L24	205.556	63.1889	24.9691	10.5409	2.36878	0.646929	3.45028	2	L	24	GH8	SCA6	L-24-GH8-SCA6
L24	243.827	65.4112	24.9691	12.9577	1.92698	0.716124	3.52354	2	L	24	GH8	SCA6	L-24-GH8-SCA6
L24	162.963	55.8714	19.4365	11.4396	1.69906	0.656024	3.0269	2	L	24	GH8	SCA6	L-24-GH8-SCA6
L24	161.111	52.8404	20.8759	10.9432	1.90766	0.725109	4.58787	2	L	24	GH8	SCA6	L-24-GH8-SCA6
L24	104.938	38.8562	13.5628	10.4822	1.29389	0.873421	2.64895	2	L	24	GH8	SCA6	L-24-GH8-SCA6
L24	120.37	51.1574	20.9644	7.45356	2.81267	0.57798	6.12994	2	L	24	GH8	SCA6	L-24-GH8-SCA6
L24	224.074	61.8872	23.9341	13.0052	1.84034	0.73519	1.22944	2	L	24	GH8	SCA6	L-24-GH8-SCA6
L24	104.938	42.7614	15.476	8.46197	1.82889	0.721173	3.40541	2	L	24	GH8	SCA6	L-24-GH8-SCA6
L24	132.716	48.3959	18.9215	10.2439	1.8471	0.712058	0.570887	2	L	24	GH8	SCA6	L-24-GH8-SCA6
L24	121.605	48.7772	19.0192	7.85674	2.42074	0.642284	5.68842	2	L	24	GH8	SCA6	L-24-GH8-SCA6
L48	80.8642	35.4439	13.3795	9.42809	1.41912	0.808879	1.22322	2	L	48	GH8	SCA6	L-48-GH8-SCA6
L48	101.235	41.9989	16.0247	8.01234	2	0.721213	2.95762	2	L	48	GH8	SCA6	L-48-GH8-SCA6
L48	96.9136	37.2848	13.4256	9.93808	1.35093	0.876052	1.85146	2	L	48	GH8	SCA6	L-48-GH8-SCA6
L48	114.198	42.6497	16.4054	8.95806	1.83135	0.788921	3.78932	2	L	48	GH8	SCA6	L-48-GH8-SCA6
L48	114.815	39.7767	13.0052	11.967	1.08675	0.911909	1.3388	2	L	48	GH8	SCA6	L-48-GH8-SCA6
L48	150.617	49.586	18.4926	10.4822	1.76419	0.769779	3.97579	2	L	48	GH8	SCA6	L-48-GH8-SCA6
L48	166.049	52.4591	19.6889	11.6003	1.69727	0.758237	1.81872	2	L	48	GH8	SCA6	L-48-GH8-SCA6
L48	212.346	55.3322	18.8889	16.4054	1.15139	0.87156	2.47789	2	L	48	GH8	SCA6	L-48-GH8-SCA6
L48	92.5926	44.2211	18.3922	6.47884	2.83881	0.595014	1.04385	2	L	48	GH8	SCA6	L-48-GH8-SCA6
L48	106.173	43.3006	16.9967	7.85674	2.16333	0.711598	3.39689	2	L	48	GH8	SCA6	L-48-GH8-SCA6
L48	175.926	56.9036	22.9061	10.2439	2.23607	0.682749	3.37592	2	L	48	GH8	SCA6	L-48-GH8-SCA6
L48	87.037	37.6661	14.9485	9.42809	1.58553	0.770926	0.405338	2	L	48	GH8	SCA6	L-48-GH8-SCA6
L48	130.864	49.9673	20.4275	9.49334	2.15178	0.658657	3.39162	2	L	48	GH8	SCA6	L-48-GH8-SCA6
L48	255.556	63.8398	23.4389	14.4871	1.61791	0.787974	1.97968	2	L	48	GH8	SCA6	L-48-GH8-SCA6
L48	170.988	53.3796	18.8889	14.9071	1.2671	0.754092	4.69871	2	L	48	GH8	SCA6	L-48-GH8-SCA6
L48	150.617	51.8082	18.4926	11.4396	1.61654	0.705159	3.17645	2	L	48	GH8	SCA6	L-48-GH8-SCA6
L48	324.074	72.9983	27.4424	18.4926	1.48397	0.764238	0.921686	2	L	48	GH8	SCA6	L-48-GH8-SCA6
L48	99.3827	39.507	14.4444	9.49334	1.52154	0.80015	0.779911	2	L	48	GH8	SCA6	L-48-GH8-SCA6
L48	105.556	43.9515	17.5682	9.55814	1.83804	0.686663	1.14984	2	L	48	GH8	SCA6	L-48-GH8-SCA6
L48	209.259	60.0463	22.3607	13.9222	1.60612	0.729328	3.51244	2	L	48	GH8	SCA6	L-48-GH8-SCA6
L48	169.753	59.507	24.267	9.16246	2.64853	0.602408	2.95397	2	L	48	GH8	SCA6	L-48-GH8-SCA6
L48	141.358	47.0942	18.9867	10.5409	1.80123	0.800932	0.491931	2	L	48	GH8	SCA6	L-48-GH8-SCA6
L48	140.123	45.4112	14.8241	13.7437	1.07861	0.853877	0.296067	2	L	48	GH8	SCA6	L-48-GH8-SCA6
L48	332.716	74.3001	28.5666	15.9087	1.79566	0.757365	2.16738	2	L	48	GH8	SCA6	L-48-GH8-SCA6
L48	366.049	78.5866	27.8665	18.3922	1.51513	0.744822	1.57952	2	L	48	GH8	SCA6	L-48-GH8-SCA6
L48	183.333	54.1421	19.8762	13.9222	1.42766	0.785924	2.73806	2	L	48	GH8	SCA6	L-48-GH8-SCA6
L48	158.642	53.3796	21.2277	10.2439	2.07222	0.699645	3.87576	2	L	48	GH8	SCA6	L-48-GH8-SCA6
L48	101.852	43.031	16.9604	8.95806	1.89331	0.691219	3.62348	2	L	48	GH8	SCA6	L-48-GH8-SCA6
L48	135.185	46.7129	16.4054	11.4396	1.43409	0.778511	2.04391	2	L	48	GH8	SCA6	L-48-GH8-SCA6
L48	150	54.1421	20.9644	12.0185	1.74434	0.643029	2.9731	2	L	48	GH8	SCA6	L-48-GH8-SCA6
L48	215.432	54.6813	17.9505	16.9239	1.06066	0.905403	0.422508	2	L	48	GH8	SCA6	L-48-GH8-SCA6
L48	114.815	46.8246	19.0192	7.85674	2.42074	0.658051	4.54158	2	L	48	GH8	SCA6	L-48-GH8-SCA6
L48	186.42	53.11	18.2236	14.2292	1.28072	0.830519	0.835677	2	L	48	GH8	SCA6	L-48-GH8-SCA6
L0	94.4444	43.9515	17.5682	8.08901	2.17186	0.614383	1.52619	3	L	0	GH8	SCA6	L-0-GH8-SCA6
L0	114.815	45.5228	18.0876	9.16246	1.9741	0.696224	2.28412	3	L	0	GH8	SCA6	L-0-GH8-SCA6
L0	91.9753	38.0474	14.2292	10.2439	1.38903	0.79842	0.45094	3	L	0	GH8	SCA6	L-0-GH8-SCA6
L0	102.469	42.3801	16.4054	8.95806	1.83135	0.716932	1.29611	3	L	0	GH8	SCA6	L-0-GH8-SCA6
L0	84.5679	35.8252	13.3795	10.2439	1.30609	0.828017	0.821167	3	L	0	GH8	SCA6	L-0-GH8-SCA6
L0	117.901	43.031	16.5179	9.49334	1.73994	0.800138	1.87695	3	L	0	GH8	SCA6	L-0-GH8-SCA6
L0	87.037	37.6661	14.9071	8.95806	1.6641	0.770926	1.98431	3	L	0	GH8	SCA6	L-0-GH8-SCA6
L0	101.852	40.4275	15.7919	8.67805	1.81975	0.783113	1.47026	3	L	0	GH8	SCA6	L-0-GH8-SCA6
L0	82.716	36.476	13.5628	9.55814	1.41898	0.78124	1.39727	3	L	0	GH8	SCA6	L-0-GH8-SCA6
L0	82.716	38.6982	14.1421	9.42809	1.5	0.694092	2.38293	3	L	0	GH8	SCA6	L-0-GH8-SCA6
L0	127.16	46.4433	18.4926	10.4822	1.76419	0.740825	0.532188	3	L	0	GH8	SCA6	L-0-GH8-SCA6
L0	157.407	55.9831	22.3331	10.0615	2.21965	0.631134	0.759586	3	L	0	GH8	SCA6	L-0-GH8-SCA6
L0	88.8889	36.0948	14.1421	9.42809	1.5	0.857372	2.35702	3	L	0	GH8	SCA6	L-0-GH8-SCA6
L0	83.3333	38.5866	15.7919	7.11458	2.21965	0.703325	1.27223	3	L	0	GH8	SCA6	L-0-GH8-SCA6
L0	117.901	43.9515	17.3916	9.93808	1.75	0.766974	2.27178	3	L	0	GH8	SCA6	L-0-GH8-SCA6
L0	86.4197	40.5392	15.476	7.02728	2.20227	0.660804	2.66082	3	L	0	GH8	SCA6	L-0-GH8-SCA6
L0	109.259	45.6345	18.3249	6.75862	2.71134	0.659297	4.78146	3	L	0	GH8	SCA6	L-0-GH8-SCA6
L0	167.284	51.5386	19.1163	12.6686	1.50895	0.791404	1.89545	3	L	0	GH8	SCA6	L-0-GH8-SCA6
L0	125.926	45.5228	18.4926	9.55814	1.93475	0.7636	2.85252	3	L	0	GH8	SCA6	L-0-GH8-SCA6
L0	100	39.6187	14.9485	10.2439	1.45925	0.800588	2.43303	3	L	0	GH8	SCA6	L-0-GH8-SCA6
L0	148.148	48.1263	18.9215	11.8113	1.60199	0.803786	2.70378	3	L	0	GH8	SCA6	L-0-GH8-SCA6
L0	137.654	51.5386	21.3726	8.95806	2.38586	0.651229	0.981776	3	L	0	GH8	SCA6	L-0-GH8-SCA6
L0	133.333	45.9041	18.2236	11.1111	1.64012	0.795143	0.524053	3	L	0	GH8	SCA6	L-0-GH8-SCA6
L0	87.6543	40.1579	16.178	7.02728	2.30217	0.683031	1.03504	3	L	0	GH8	SCA6	L-0-GH8-SCA6
L0	88.2716	41.7293	17.5682	7.11458	2.46932	0.637014	2.22888	3	L	0	GH8	SCA6	L-0-GH8-SCA6
L0	104.321	46.1737	18.8889	8.95806	2.10859	0.614882	0.948428	3	L	0	GH8	SCA6	L-0-GH8-SCA6
L0	87.037	43.5702	17.5682	6.47884	2.71163	0.576148	5.79769	3	L	0	GH8	SCA6	L-0-GH8-SCA6
L0	103.086	49.1585	18.0876	10.2439	1.76569	0.536061	4.02123	3	L	0	GH8	SCA6	L-0-GH8-SCA6
L0	106.79	43.031	16.6667	9.55814	1.74371	0.724732	2.44341	3	L	0	GH8	SCA6	L-0-GH8-SCA6
L0	88.2716	36.3644	13.4256	9.49334	1.41421	0.83884	0.529616	3	L	0	GH8	SCA6	L-0-GH8-SCA6
L0	95.679	39.8883	16.0247	8.95806	1.78885	0.755675	0.432305	3	L	0	GH8	SCA6	L-0-GH8-SCA6
L0	100	39.6187	15.1127	10.4822	1.44175	0.800588	0.03268	3	L	0	GH8	SCA6	L-0-GH8-SCA6
L0	104.321	42.6497	17.3916	8.95806	1.94145	0.72069	0.542129	3	L	0	GH8	SCA6	L-0-GH8-SCA6
L0	120.988	45.5228	18.8889	8.95806	2.10859	0.733655	1.86366	3	L	0	GH8	SCA6	L-0-GH8-SCA6
L24	73.4568	38.5866	15.9087	6.75862	2.35384	0.619968	3.04822	3	L	24	GH8	SCA6	L-24-GH8-SCA6
L24	61.7284	34.793	14.2292	7.11458	2	0.640783	1.90291	3	L	24	GH8	SCA6	L-24-GH8-SCA6
L24	123.457	46.8246	18.9867	9.49334	2	0.707582	1.04326	3	L	24	GH8	SCA6	L-24-GH8-SCA6
L24	74.6913	36.3644	15.1127	7.11458	2.12419	0.709788	0.596029	3	L	24	GH8	SCA6	L-24-GH8-SCA6
L24	37.037	24.9836	9.93808	4.96904	2	0.745649	1.18113	3	L	24	GH8	SCA6	L-24-GH8-SCA6
L24	117.284	43.6819	16.0247	10.4822	1.52875	0.772406	1.5026	3	L	24	GH8	SCA6	L-24-GH8-SCA6
L24	202.469	63.4585	25.8438	9.93808	2.60048	0.631813	5.43793	3	L	24	GH8	SCA6	L-24-GH8-SCA6
L24	124.691	45.9041	16.6667	11.1111	1.5	0.743606	1.45295	3	L	24	GH8	SCA6	L-24-GH8-SCA6
L24	165.432	48.6655	16.178	13.7437	1.17712	0.877782	0.87749	3	L	24	GH8	SCA6	L-24-GH8-SCA6
L24	58.0247	29.4281	10.4822	8.01234	1.30826	0.841974	1.1695	3	L	24	GH8	SCA6	L-24-GH8-SCA6
L24	110.494	43.031	16.9239	9.49334	1.78272	0.749867	2.57987	3	L	24	GH8	SCA6	L-24-GH8-SCA6
L24	118.518	42.3801	15.9087	9.16246	1.73629	0.829223	1.67754	3	L	24	GH8	SCA6	L-24-GH8-SCA6
L24	144.444	48.6655	18.6256	11.6003	1.60561	0.766421	2.44018	3	L	24	GH8	SCA6	L-24-GH8-SCA6
L24	154.321	50.8878	19.4047	11.3312	1.71251	0.748873	2.26145	3	L	24	GH8	SCA6	L-24-GH8-SCA6
L24	114.198	43.031	16.178	9.16246	1.76569	0.775003	3.49408	3	L	24	GH8	SCA6	L-24-GH8-SCA6
L24	153.086	49.9673	20.0308	10.4822	1.91094	0.770504	0.445312	3	L	24	GH8	SCA6	L-24-GH8-SCA6
L24	125.309	46.1737	18.3249	9.16246	2	0.738586	0.778501	3	L	24	GH8	SCA6	L-24-GH8-SCA6
L24	104.938	44.6024	17.5682	9.49334	1.85058	0.662869	1.33198	3	L	24	GH8	SCA6	L-24-GH8-SCA6
L24	159.259	49.9673	18.6256	11.6003	1.60561	0.801573	0.793122	3	L	24	GH8	SCA6	L-24-GH8-SCA6
L24	150	48.3959	19.1163	12.0185	1.59057	0.804791	0.526793	3	L	24	GH8	SCA6	L-24-GH8-SCA6
L24	143.21	49.9673	19.7828	11.1111	1.78045	0.720794	2.11449	3	L	24	GH8	SCA6	L-24-GH8-SCA6
L24	90.1234	40.1579	16.178	8.08901	2	0.702272	1.66016	3	L	24	GH8	SCA6	L-24-GH8-SCA6
L24	61.1111	34.1421	13.9222	5.98352	2.32676	0.658793	2.92609	3	L	24	GH8	SCA6	L-24-GH8-SCA6
L24	124.074	50.2369	20.4275	7.85674	2.6	0.617796	1.95743	3	L	24	GH8	SCA6	L-24-GH8-SCA6
L24	104.938	40.1579	15.1127	9.16246	1.64942	0.817714	1.00321	3	L	24	GH8	SCA6	L-24-GH8-SCA6
L24	85.1852	39.2375	15.476	7.02728	2.20227	0.6953	2.88486	3	L	24	GH8	SCA6	L-24-GH8-SCA6
L24	80.2469	38.8562	15.9087	6.47884	2.45549	0.66791	2.68094	3	L	24	GH8	SCA6	L-24-GH8-SCA6
L24	73.4568	35.4439	14.2292	8.67805	1.63967	0.734783	0.424945	3	L	24	GH8	SCA6	L-24-GH8-SCA6
L24	144.444	48.6655	18.4926	10.4822	1.76419	0.766421	3.81379	3	L	24	GH8	SCA6	L-24-GH8-SCA6
L24	94.4444	44.872	18.4926	7.11458	2.59925	0.589435	5.34466	3	L	24	GH8	SCA6	L-24-GH8-SCA6
L24	135.185	49.3164	19.4047	9.49334	2.04404	0.698483	3.28319	3	L	24	GH8	SCA6	L-24-GH8-SCA6
L24	180.864	56.5223	22.4983	10.4822	2.14633	0.711415	4.28392	3	L	24	GH8	SCA6	L-24-GH8-SCA6
L24	141.975	52.1895	21.3726	8.95806	2.38586	0.655022	0.473484	3	L	24	GH8	SCA6	L-24-GH8-SCA6
L24	105.556	42.6497	17.3561	7.85674	2.20907	0.729219	5.33274	3	L	24	GH8	SCA6	L-24-GH8-SCA6
L24	96.9136	41.7293	16.5179	8.67805	1.90341	0.699379	0.299739	3	L	24	GH8	SCA6	L-24-GH8-SCA6
L24	81.4815	36.634	14.4871	8.01234	1.8081	0.762959	0.73742	3	L	24	GH8	SCA6	L-24-GH8-SCA6
L24	82.0987	38.5866	14.8241	8.08901	1.83262	0.692905	1.69337	3	L	24	GH8	SCA6	L-24-GH8-SCA6
L24	127.778	45.7924	16.9967	11.3312	1.5	0.765733	0.81331	3	L	24	GH8	SCA6	L-24-GH8-SCA6
L48	94.4444	41.7293	16.8142	7.85674	2.14009	0.681561	3.53701	3	L	48	GH8	SCA6	L-48-GH8-SCA6
L48	139.506	45.9041	16.9604	12.0185	1.41119	0.831955	0.510549	3	L	48	GH8	SCA6	L-48-GH8-SCA6
L48	101.235	40.5392	15.9087	8.46197	1.88002	0.774084	1.98365	3	L	48	GH8	SCA6	L-48-GH8-SCA6
L48	79.0123	36.0948	14.2292	8.67805	1.63967	0.762108	1.97639	3	L	48	GH8	SCA6	L-48-GH8-SCA6
L48	143.21	47.3638	16.9239	11.967	1.41421	0.802213	2.12734	3	L	48	GH8	SCA6	L-48-GH8-SCA6
L48	114.198	43.9515	16.5179	9.42809	1.75198	0.742881	3.43576	3	L	48	GH8	SCA6	L-48-GH8-SCA6
L48	114.198	46.1737	18.6256	8.08901	2.30258	0.673096	4.36391	3	L	48	GH8	SCA6	L-48-GH8-SCA6
L48	109.259	43.031	16.178	9.16246	1.76569	0.741489	2.86081	3	L	48	GH8	SCA6	L-48-GH8-SCA6
L48	114.198	43.031	15.476	10.5409	1.46818	0.775003	1.19206	3	L	48	GH8	SCA6	L-48-GH8-SCA6
L48	88.2716	37.6661	15.1127	8.67805	1.74149	0.781861	2.36355	3	L	48	GH8	SCA6	L-48-GH8-SCA6
L48	98.7654	41.4597	16.4054	8.95806	1.83135	0.722043	1.7859	3	L	48	GH8	SCA6	L-48-GH8-SCA6
L48	108.642	40.1579	15.476	9.49334	1.6302	0.846574	1.60638	3	L	48	GH8	SCA6	L-48-GH8-SCA6
L48	95.0617	40.1579	15.9087	8.46197	1.88002	0.740752	2.40759	3	L	48	GH8	SCA6	L-48-GH8-SCA6
L48	140.123	47.0942	18.2236	11.1111	1.64012	0.793937	1.27649	3	L	48	GH8	SCA6	L-48-GH8-SCA6
L48	108.025	40.8088	14.8241	9.16246	1.61791	0.815127	0.703599	3	L	48	GH8	SCA6	L-48-GH8-SCA6
L48	120.37	47.8567	18.9867	8.46197	2.24376	0.660455	2.54343	3	L	48	GH8	SCA6	L-48-GH8-SCA6
L48	91.358	40.1579	15.9087	7.45356	2.13437	0.711892	4.01113	3	L	48	GH8	SCA6	L-48-GH8-SCA6
L48	89.5062	37.6661	14.4444	8.46197	1.70698	0.792796	0.469657	3	L	48	GH8	SCA6	L-48-GH8-SCA6
L48	136.42	46.1737	17.2491	10.2439	1.68383	0.804077	2.55546	3	L	48	GH8	SCA6	L-48-GH8-SCA6
L48	101.852	43.9515	16.9239	8.46197	2	0.662569	2.06373	3	L	48	GH8	SCA6	L-48-GH8-SCA6
L48	112.346	41.4597	15.476	9.49334	1.6302	0.821324	1.61713	3	L	48	GH8	SCA6	L-48-GH8-SCA6
L48	135.185	48.0147	18.9215	10.2439	1.8471	0.73687	1.0238	3	L	48	GH8	SCA6	L-48-GH8-SCA6
L48	120.37	42.6497	15.436	10.4822	1.4726	0.831565	4.5458	3	L	48	GH8	SCA6	L-48-GH8-SCA6
L48	147.531	47.0942	16.9239	11.967	1.41421	0.835907	3.02084	3	L	48	GH8	SCA6	L-48-GH8-SCA6
L48	111.728	44.872	17.5682	9.49334	1.85058	0.697305	1.7019	3	L	48	GH8	SCA6	L-48-GH8-SCA6
L48	169.753	51.1574	18.4926	12.0185	1.53868	0.815101	3.07786	3	L	48	GH8	SCA6	L-48-GH8-SCA6
L48	77.7778	36.0948	14.0546	7.02728	2	0.7502	2.91653	3	L	48	GH8	SCA6	L-48-GH8-SCA6
L48	66.6667	32.9521	12.9577	8.01234	1.61722	0.771531	0.079365	3	L	48	GH8	SCA6	L-48-GH8-SCA6
L48	125.926	45.5228	18.3922	10.9432	1.6807	0.7636	2.15534	3	L	48	GH8	SCA6	L-48-GH8-SCA6
L48	98.7654	40.1579	15.476	8.46197	1.82889	0.769613	0.104167	3	L	48	GH8	SCA6	L-48-GH8-SCA6
L48	107.407	41.4597	15.7919	10.2439	1.54158	0.785222	0.698449	3	L	48	GH8	SCA6	L-48-GH8-SCA6
L48	133.951	47.0942	17.2491	10.2439	1.68383	0.758962	2.85046	3	L	48	GH8	SCA6	L-48-GH8-SCA6
L48	130.864	44.6024	15.7919	11.8113	1.33702	0.826637	1.28276	3	L	48	GH8	SCA6	L-48-GH8-SCA6
L48	79.0123	37.0152	13.7437	8.08901	1.69906	0.724676	1.09369	3	L	48	GH8	SCA6	L-48-GH8-SCA6
L48	119.753	43.3006	15.9087	10.9432	1.45375	0.802617	1.93825	3	L	48	GH8	SCA6	L-48-GH8-SCA6
L48	96.9136	40.8088	15.9087	7.85674	2.02485	0.731285	0.793323	3	L	48	GH8	SCA6	L-48-GH8-SCA6
L48	112.963	41.7293	15.7919	10.2439	1.54158	0.8152	2.54612	3	L	48	GH8	SCA6	L-48-GH8-SCA6
L48	170.988	51.5386	17.3916	13.9222	1.2492	0.808926	0.834523	3	L	48	GH8	SCA6	L-48-GH8-SCA6
L48	126.543	51.9199	21.2277	7.85674	2.70185	0.589903	4.72915	3	L	48	GH8	SCA6	L-48-GH8-SCA6
L48	166.667	53.11	20.4879	11.8113	1.7346	0.742517	3.38883	3	L	48	GH8	SCA6	L-48-GH8-SCA6
L48	106.79	43.5702	17.3561	8.67805	2	0.706905	2.79039	3	L	48	GH8	SCA6	L-48-GH8-SCA6
L48	135.802	46.4433	17.9505	10.9432	1.64034	0.791172	0.631462	3	L	48	GH8	SCA6	L-48-GH8-SCA6
L48	129.012	46.1737	16.9239	10.9432	1.54653	0.760416	1.19671	3	L	48	GH8	SCA6	L-48-GH8-SCA6
L48	133.333	47.7451	18.3249	10.2439	1.78885	0.735007	0.210851	3	L	48	GH8	SCA6	L-48-GH8-SCA6
L48	117.284	45.5228	17.9161	8.95806	2	0.711197	2.73793	3	L	48	GH8	SCA6	L-48-GH8-SCA6
L48	139.506	47.7451	17.9505	10.9432	1.64034	0.769035	1.71023	3	L	48	GH8	SCA6	L-48-GH8-SCA6
L48	80.8642	41.1901	17.2491	5.66558	3.04454	0.598937	0.911877	3	L	48	GH8	SCA6	L-48-GH8-SCA6
L48	131.481	49.3164	19.6576	10.2439	1.91895	0.679347	2.15935	3	L	48	GH8	SCA6	L-48-GH8-SCA6
L48	134.568	47.7451	16.9967	11.3312	1.5	0.741813	0.854443	3	L	48	GH8	SCA6	L-48-GH8-SCA6
L48	170.37	55.3322	21.0818	10.5409	2	0.699275	4.19716	3	L	48	GH8	SCA6	L-48-GH8-SCA6
L48	159.877	52.4591	20.4879	10.2439	2	0.73005	2.66821	3	L	48	GH8	SCA6	L-48-GH8-SCA6
L48	75.9259	36.3644	14.4444	7.45356	1.93793	0.72152	1.92679	3	L	48	GH8	SCA6	L-48-GH8-SCA6
L48	104.938	43.3006	18.0876	8.67805	2.08429	0.703324	1.49982	3	L	48	GH8	SCA6	L-48-GH8-SCA6
L48	98.1481	41.7293	16.9239	8.46197	2	0.708289	1.70474	3	L	48	GH8	SCA6	L-48-GH8-SCA6
L48	117.284	44.6024	16.9604	8.95806	1.89331	0.740854	1.17241	3	L	48	GH8	SCA6	L-48-GH8-SCA6
L48	130.247	46.1737	17.9161	8.95806	2	0.767693	3.9033	3	L	48	GH8	SCA6	L-48-GH8-SCA6
D0	400	79.3954	29.3342	18.3922	1.59493	0.797406	2.10181	1	D	0	GH8	SCA6	D-0-GH8-SCA6
D0	373.457	80.9667	30.8721	16.4054	1.88183	0.715875	1.59668	1	D	0	GH8	SCA6	D-0-GH8-SCA6
D0	227.16	58.4749	18.9867	16.5179	1.14946	0.834841	2.23489	1	D	0	GH8	SCA6	D-0-GH8-SCA6
D0	353.704	76.5223	29.3552	17.9161	1.63848	0.759056	3.89005	1	D	0	GH8	SCA6	D-0-GH8-SCA6
D0	320.37	69.4743	23.3598	20.8759	1.11898	0.834091	0.675302	1	D	0	GH8	SCA6	D-0-GH8-SCA6
D0	227.16	62.9193	25.5797	14.4871	1.76569	0.721065	1.59133	1	D	0	GH8	SCA6	D-0-GH8-SCA6
D0	397.531	82.1568	31.1309	16.6667	1.86786	0.740105	1.4278	1	D	0	GH8	SCA6	D-0-GH8-SCA6
D0	206.79	61.8872	25.5797	12.2222	2.09288	0.678481	2.53099	1	D	0	GH8	SCA6	D-0-GH8-SCA6
D0	282.099	68.5539	25.9391	14.9485	1.73524	0.754305	1.53275	1	D	0	GH8	SCA6	D-0-GH8-SCA6
D0	222.839	66.3316	24.9691	11.4396	2.18269	0.636444	4.93893	1	D	0	GH8	SCA6	D-0-GH8-SCA6
D0	165.432	57.1732	24.037	11.1111	2.16333	0.635983	1.42324	1	D	0	GH8	SCA6	D-0-GH8-SCA6
D0	198.765	60.3158	23.8566	12.4226	1.92042	0.686575	2.90587	1	D	0	GH8	SCA6	D-0-GH8-SCA6
D0	198.148	54.6813	19.6889	14.0546	1.40089	0.832763	0.210706	1	D	0	GH8	SCA6	D-0-GH8-SCA6
D0	271.605	67.3638	26.8971	15.7919	1.70323	0.752133	2.72696	1	D	0	GH8	SCA6	D-0-GH8-SCA6
D0	375.309	79.3954	30.8121	17.3916	1.77166	0.748183	3.00673	1	D	0	GH8	SCA6	D-0-GH8-SCA6
D0	261.728	68.2843	25.9391	14.6144	1.7749	0.705374	2.63454	1	D	0	GH8	SCA6	D-0-GH8-SCA6
D0	232.099	63.8398	25.652	12.2726	2.09018	0.715648	1.5517	1	D	0	GH8	SCA6	D-0-GH8-SCA6
D0	258.025	63.8398	23.9856	14.8241	1.61802	0.795587	1.82038	1	D	0	GH8	SCA6	D-0-GH8-SCA6
D0	335.185	73.9188	28.8461	17.2491	1.67233	0.770877	0.96788	1	D	0	GH8	SCA6	D-0-GH8-SCA6
D0	265.432	68.2843	27.0573	14.0546	1.92516	0.715356	1.11665	1	D	0	GH8	SCA6	D-0-GH8-SCA6
D0	270.37	63.8398	24.037	16.0247	1.5	0.833653	1.01822	1	D	0	GH8	SCA6	D-0-GH8-SCA6
D0	241.975	66.9825	25.9391	14.6144	1.7749	0.677732	0.909101	1	D	0	GH8	SCA6	D-0-GH8-SCA6
D0	262.963	62.5381	22.25	15.5952	1.42672	0.84492	3.88716	1	D	0	GH8	SCA6	D-0-GH8-SCA6
D0	411.111	83.4585	32.0686	18.3249	1.75	0.741698	1.85296	1	D	0	GH8	SCA6	D-0-GH8-SCA6
D24	356.173	74.6813	27.4874	16.178	1.69906	0.802503	4.79334	1	D	24	GH8	SCA6	D-24-GH8-SCA6
D24	350	77.4428	29.3552	14.4871	2.0263	0.733358	0.346802	1	D	24	GH8	SCA6	D-24-GH8-SCA6
D24	185.185	58.0936	23.7788	11.1111	2.14009	0.689539	1.37221	1	D	24	GH8	SCA6	D-24-GH8-SCA6
D24	347.531	75.6018	29.9176	16.9239	1.76777	0.76408	0.793552	1	D	24	GH8	SCA6	D-24-GH8-SCA6
D24	200.617	60.4275	24.037	13.5628	1.77227	0.690412	1.04161	1	D	24	GH8	SCA6	D-24-GH8-SCA6
D24	393.827	83.4585	28.8889	19.4047	1.48876	0.710516	4.63557	1	D	24	GH8	SCA6	D-24-GH8-SCA6
D24	258.025	67.903	25.5797	12.9577	1.9741	0.703223	0.790854	1	D	24	GH8	SCA6	D-24-GH8-SCA6
D24	333.951	73.9188	28.6744	15.1127	1.89737	0.768037	0.250705	1	D	24	GH8	SCA6	D-24-GH8-SCA6
D24	311.111	74.5697	28.8889	14.4444	2	0.703074	5.85763	1	D	24	GH8	SCA6	D-24-GH8-SCA6
D24	214.815	62.9193	24.037	13.5628	1.77227	0.681876	5.05031	1	D	24	GH8	SCA6	D-24-GH8-SCA6
D24	317.901	74.3001	29.2288	14.6144	2	0.723642	5.10244	1	D	24	GH8	SCA6	D-24-GH8-SCA6
D24	199.383	55.6018	20.7573	12.6686	1.63848	0.810437	1.72284	1	D	24	GH8	SCA6	D-24-GH8-SCA6
D24	269.753	70.7761	27.1257	12.6686	2.14117	0.676711	2.33559	1	D	24	GH8	SCA6	D-24-GH8-SCA6
D24	317.901	74.8393	26.7129	20.7573	1.28692	0.713252	2.06284	1	D	24	GH8	SCA6	D-24-GH8-SCA6
D24	346.296	74.8393	26.5041	16.9604	1.56271	0.77696	4.96926	1	D	24	GH8	SCA6	D-24-GH8-SCA6
D24	325.309	71.6966	26.0104	15.476	1.6807	0.795259	3.67596	1	D	24	GH8	SCA6	D-24-GH8-SCA6
D24	305.555	73.3796	28.4583	17.3561	1.63967	0.713098	3.27343	1	D	24	GH8	SCA6	D-24-GH8-SCA6
D24	243.827	66.3316	26.8742	13.3795	2.0086	0.696387	3.81066	1	D	24	GH8	SCA6	D-24-GH8-SCA6
D24	262.346	65.4112	24.6707	14.6144	1.68811	0.770513	0.904096	1	D	24	GH8	SCA6	D-24-GH8-SCA6
D24	296.914	72.0778	27.0573	15.476	1.74834	0.718185	0.846732	1	D	24	GH8	SCA6	D-24-GH8-SCA6
D24	277.778	73.6492	29.6481	14.8241	2	0.643534	1.94394	1	D	24	GH8	SCA6	D-24-GH8-SCA6
D48	371.605	79.0141	26.7591	22.0549	1.21329	0.747966	5.91357	1	D	48	GH8	SCA6	D-48-GH8-SCA6
D48	362.963	78.6328	28.5666	17.2491	1.65612	0.737674	2.74707	1	D	48	GH8	SCA6	D-48-GH8-SCA6
D48	243.827	60.4275	21.5739	16.6667	1.29443	0.839117	0.79835	1	D	48	GH8	SCA6	D-48-GH8-SCA6
D48	233.333	65.6808	25.3372	12.6686	2	0.679689	4.62969	1	D	48	GH8	SCA6	D-48-GH8-SCA6
D48	350	72.9983	25.9153	19.4365	1.33333	0.825377	2.77106	1	D	48	GH8	SCA6	D-48-GH8-SCA6
D48	309.876	73.6492	29.3552	15.436	1.90173	0.717898	1.46253	1	D	48	GH8	SCA6	D-48-GH8-SCA6
D48	304.321	73.3796	29.0806	16.5179	1.76055	0.710217	0.907872	1	D	48	GH8	SCA6	D-48-GH8-SCA6
D48	351.852	74.0305	26.8742	17.9161	1.5	0.806768	5.23987	1	D	48	GH8	SCA6	D-48-GH8-SCA6
D48	201.852	57.2848	21.3437	15.7919	1.35157	0.772971	3.14941	1	D	48	GH8	SCA6	D-48-GH8-SCA6
D48	330.247	88.5539	29.8142	21.3726	1.39497	0.529217	2.87194	1	D	48	GH8	SCA6	D-48-GH8-SCA6
D48	251.852	66.062	23.9341	15.476	1.54653	0.725189	4.18303	1	D	48	GH8	SCA6	D-48-GH8-SCA6
D48	270.37	65.1416	23.544	15.476	1.52133	0.800668	2.65219	1	D	48	GH8	SCA6	D-48-GH8-SCA6
D48	243.21	63.3006	24.267	12.6686	1.91552	0.762737	3.95652	1	D	48	GH8	SCA6	D-48-GH8-SCA6
D48	370.988	82.4264	32.6788	15.1127	2.16233	0.686178	2.98362	1	D	48	GH8	SCA6	D-48-GH8-SCA6
D48	262.963	68.6655	25.9153	12.9577	2	0.700853	5.91658	1	D	48	GH8	SCA6	D-48-GH8-SCA6
D48	200.617	58.7445	22.3331	12.2726	1.81975	0.730539	2.20301	1	D	48	GH8	SCA6	D-48-GH8-SCA6
D48	265.432	63.8398	23.2007	15.1127	1.53517	0.818427	3.9787	1	D	48	GH8	SCA6	D-48-GH8-SCA6
D48	238.272	67.3638	25.9391	11.3312	2.28919	0.659825	4.69293	1	D	48	GH8	SCA6	D-48-GH8-SCA6
D48	247.531	68.9351	26.7129	15.1127	1.76758	0.654573	2.56923	1	D	48	GH8	SCA6	D-48-GH8-SCA6
D0	48.1481	30.3486	11.6003	5.98352	1.93872	0.656921	0.670343	2	D	0	GH8	SCA6	D-0-GH8-SCA6
D0	94.4444	42.6497	17.5682	8.01234	2.19265	0.652459	2.33503	2	D	0	GH8	SCA6	D-0-GH8-SCA6
D0	72.8395	34.793	13.7437	6.75862	2.0335	0.756124	1.69808	2	D	0	GH8	SCA6	D-0-GH8-SCA6
D0	90.1234	42.3801	16.9239	7.45356	2.27059	0.630555	4.24837	2	D	0	GH8	SCA6	D-0-GH8-SCA6
D0	30.8642	24.9836	9.93808	4.00617	2.48069	0.621374	0.455589	2	D	0	GH8	SCA6	D-0-GH8-SCA6
D0	58.0247	31.269	11.3312	7.85674	1.44222	0.745751	0.626665	2	D	0	GH8	SCA6	D-0-GH8-SCA6
D0	104.938	46.062	19.6576	6.28539	3.1275	0.621523	5.68702	2	D	0	GH8	SCA6	D-0-GH8-SCA6
D0	96.2963	46.8246	18.9215	7.11458	2.65954	0.551914	2.71298	2	D	0	GH8	SCA6	D-0-GH8-SCA6
D0	48.7654	28.7772	10.2439	6.75862	1.51568	0.739987	1.44177	2	D	0	GH8	SCA6	D-0-GH8-SCA6
D0	46.9136	31.6503	12.6686	4.58123	2.76533	0.588508	1.66388	2	D	0	GH8	SCA6	D-0-GH8-SCA6
D0	94.4444	38.5866	14.4871	9.55814	1.51568	0.797102	0.658243	2	D	0	GH8	SCA6	D-0-GH8-SCA6
D0	81.4815	37.0152	14.9485	7.85674	1.90263	0.747322	1.91814	2	D	0	GH8	SCA6	D-0-GH8-SCA6
D0	28.3951	23.6819	9.49334	3.51364	2.70185	0.636238	2.96753	2	D	0	GH8	SCA6	D-0-GH8-SCA6
D0	67.2839	38.5866	16.9239	5.98352	2.82843	0.56787	0.486139	2	D	0	GH8	SCA6	D-0-GH8-SCA6
D0	57.4074	34.1421	13.7437	5.66558	2.42582	0.618866	0.489327	2	D	0	GH8	SCA6	D-0-GH8-SCA6
D0	73.4568	34.1421	13.4256	8.46197	1.58658	0.791882	0.898489	2	D	0	GH8	SCA6	D-0-GH8-SCA6
D0	45.679	31.6503	12.9577	4.96904	2.60768	0.573021	2.38284	2	D	0	GH8	SCA6	D-0-GH8-SCA6
D0	41.358	28.7772	12.0185	4.96904	2.41868	0.627584	1.56163	2	D	0	GH8	SCA6	D-0-GH8-SCA6
D0	38.8889	30.079	12.4226	4.96904	2.5	0.540144	1.01446	2	D	0	GH8	SCA6	D-0-GH8-SCA6
D0	69.1358	37.5544	15.7135	6.28539	2.5	0.616014	0.992063	2	D	0	GH8	SCA6	D-0-GH8-SCA6
D0	74.0741	40.1579	16.0247	6.47884	2.47339	0.57721	1.61131	2	D	0	GH8	SCA6	D-0-GH8-SCA6
D0	50.6173	30.3486	12.6686	5.55556	2.28035	0.690609	2.78708	2	D	0	GH8	SCA6	D-0-GH8-SCA6
D0	58.0247	31.6503	12.4226	5.98352	2.07614	0.727892	2.29061	2	D	0	GH8	SCA6	D-0-GH8-SCA6
D0	46.2963	32.8404	13.3795	6.28539	2.12867	0.539436	1.79876	2	D	0	GH8	SCA6	D-0-GH8-SCA6
D0	38.2716	24.9836	9.55814	5.55556	1.72046	0.770504	1.86791	2	D	0	GH8	SCA6	D-0-GH8-SCA6
D0	42.5926	33.2217	14.0546	4.58123	3.06786	0.484955	1.05364	2	D	0	GH8	SCA6	D-0-GH8-SCA6
D0	56.7901	32.5708	13.7437	5.66558	2.42582	0.672707	1.61755	2	D	0	GH8	SCA6	D-0-GH8-SCA6
D0	52.4691	30.9994	12.4226	5.98352	2.07614	0.68613	0.99781	2	D	0	GH8	SCA6	D-0-GH8-SCA6
D0	34.5679	24.0632	8.67805	5.55556	1.56205	0.7502	1.32584	2	D	0	GH8	SCA6	D-0-GH8-SCA6
D0	67.2839	34.1421	13.5628	7.11458	1.90634	0.725337	1.5854	2	D	0	GH8	SCA6	D-0-GH8-SCA6
D0	48.7654	30.9994	12.6686	5.55556	2.28035	0.637697	3.46914	2	D	0	GH8	SCA6	D-0-GH8-SCA6
D0	56.7901	33.4913	14.2292	6.28539	2.26385	0.636238	0.802736	2	D	0	GH8	SCA6	D-0-GH8-SCA6
D0	50	33.6029	14.0546	4.58123	3.06786	0.556449	1.81255	2	D	0	GH8	SCA6	D-0-GH8-SCA6
D0	72.2222	37.6661	15.476	5.98352	2.58644	0.639704	3.10498	2	D	0	GH8	SCA6	D-0-GH8-SCA6
D0	50.6173	31.269	13.5628	5.55556	2.44131	0.650548	1.52925	2	D	0	GH8	SCA6	D-0-GH8-SCA6
D0	58.0247	33.4913	13.5628	5.55556	2.44131	0.650069	4.20202	2	D	0	GH8	SCA6	D-0-GH8-SCA6
D0	29.6296	29.4281	11.6003	3.51364	3.30152	0.429944	2.03704	2	D	0	GH8	SCA6	D-0-GH8-SCA6
D0	44.4444	33.4913	14.4871	4.00617	3.6162	0.497925	4.46943	2	D	0	GH8	SCA6	D-0-GH8-SCA6
D0	123.457	48.6655	19.1807	8.95806	2.14117	0.655061	1.59137	2	D	0	GH8	SCA6	D-0-GH8-SCA6
D0	55.5555	30.3486	11.8113	7.11458	1.66015	0.757986	1.39608	2	D	0	GH8	SCA6	D-0-GH8-SCA6
D0	109.259	44.3328	16.9967	7.85674	2.16333	0.698584	2.40967	2	D	0	GH8	SCA6	D-0-GH8-SCA6
D0	43.2099	29.4281	11.3312	4.58123	2.47339	0.627002	3.8056	2	D	0	GH8	SCA6	D-0-GH8-SCA6
D0	86.4197	36.0948	12.4226	9.93808	1.25	0.833556	1.11419	2	D	0	GH8	SCA6	D-0-GH8-SCA6
D0	43.2099	29.4281	12.0185	5.55556	2.16333	0.627002	1.31499	2	D	0	GH8	SCA6	D-0-GH8-SCA6
D24	117.284	44.2211	17.3916	9.93808	1.75	0.753684	2.57262	2	D	24	GH8	SCA6	D-24-GH8-SCA6
D24	58.642	30.9994	12.5708	6.28539	2	0.766851	3.14835	2	D	24	GH8	SCA6	D-24-GH8-SCA6
D24	77.1605	37.6661	15.476	7.02728	2.20227	0.683445	1.03705	2	D	24	GH8	SCA6	D-24-GH8-SCA6
D24	117.901	47.0942	19.6576	9.42809	2.085	0.668026	1.11016	2	D	24	GH8	SCA6	D-24-GH8-SCA6
D24	71.6049	34.4117	13.5172	7.85674	1.72046	0.759871	0.978616	2	D	24	GH8	SCA6	D-24-GH8-SCA6
D24	120.37	44.872	18.3922	9.93808	1.85068	0.751241	0.504348	2	D	24	GH8	SCA6	D-24-GH8-SCA6
D24	103.086	38.5866	13.4256	10.9432	1.22685	0.870039	1.5193	2	D	24	GH8	SCA6	D-24-GH8-SCA6
D24	50.6173	27.2059	9.93808	7.45356	1.33333	0.859377	0.549554	2	D	24	GH8	SCA6	D-24-GH8-SCA6
D24	80.8642	35.4439	13.0052	8.46197	1.5369	0.808879	0.386326	2	D	24	GH8	SCA6	D-24-GH8-SCA6
D24	103.704	44.9836	18.6256	7.02728	2.65047	0.644013	3.78012	2	D	24	GH8	SCA6	D-24-GH8-SCA6
D24	82.0987	39.507	16.5179	7.11458	2.32169	0.660994	1.72094	2	D	24	GH8	SCA6	D-24-GH8-SCA6
D24	92.5926	43.3006	17.9161	7.45356	2.4037	0.62058	4.35524	2	D	24	GH8	SCA6	D-24-GH8-SCA6
D24	103.704	46.4433	19.8762	7.45356	2.66667	0.604168	0.748162	2	D	24	GH8	SCA6	D-24-GH8-SCA6
D24	108.025	40.8088	15.1127	10.4822	1.44175	0.815127	1.2478	2	D	24	GH8	SCA6	D-24-GH8-SCA6
D24	113.58	42.3801	15.7919	10.2439	1.54158	0.794672	0.782279	2	D	24	GH8	SCA6	D-24-GH8-SCA6
D24	71.6049	34.793	13.5628	6.47884	2.09341	0.743308	3.11787	2	D	24	GH8	SCA6	D-24-GH8-SCA6
D24	106.79	43.9515	16.9604	8.01234	2.11678	0.694694	3.92767	2	D	24	GH8	SCA6	D-24-GH8-SCA6
D24	97.5308	38.8562	14.4871	9.55814	1.51568	0.811768	1.31324	2	D	24	GH8	SCA6	D-24-GH8-SCA6
D24	63.5802	33.2217	13.9222	6.47884	2.14887	0.723918	2.06505	2	D	24	GH8	SCA6	D-24-GH8-SCA6
D24	77.1605	39.507	16.5179	7.11458	2.32169	0.621234	0.921304	2	D	24	GH8	SCA6	D-24-GH8-SCA6
D24	80.2469	38.8562	16.0247	7.11458	2.25237	0.66791	1.2155	2	D	24	GH8	SCA6	D-24-GH8-SCA6
D24	36.4197	25.6345	10.9432	4.96904	2.20227	0.696461	1.33177	2	D	24	GH8	SCA6	D-24-GH8-SCA6
D24	57.4074	31.9199	13.4256	5.98352	2.24376	0.708034	1.54825	2	D	24	GH8	SCA6	D-24-GH8-SCA6
D24	116.049	45.9041	18.3249	8.08901	2.26541	0.692069	3.12215	2	D	24	GH8	SCA6	D-24-GH8-SCA6
D24	67.9012	35.7135	15.1127	7.11458	2.12419	0.668995	0.443782	2	D	24	GH8	SCA6	D-24-GH8-SCA6
D24	79.6296	36.3644	14.9485	7.85674	1.90263	0.756716	1.31964	2	D	24	GH8	SCA6	D-24-GH8-SCA6
D24	94.4444	41.7293	16.9604	8.01234	2.11678	0.681561	1.18281	2	D	24	GH8	SCA6	D-24-GH8-SCA6
D24	135.185	46.555	16.9239	10.9432	1.54653	0.783802	3.07788	2	D	24	GH8	SCA6	D-24-GH8-SCA6
D24	38.2716	25.3649	9.49334	4.58123	2.07222	0.747514	3.1027	2	D	24	GH8	SCA6	D-24-GH8-SCA6
D24	82.716	41.0784	17.2848	7.85674	2.2	0.615988	0.960369	2	D	24	GH8	SCA6	D-24-GH8-SCA6
D24	78.395	35.9831	14.2292	7.11458	2	0.760855	4.22732	2	D	24	GH8	SCA6	D-24-GH8-SCA6
D24	66.0494	34.1421	13.5628	6.47884	2.09341	0.712028	0.762807	2	D	24	GH8	SCA6	D-24-GH8-SCA6
D24	60.4938	36.0948	14.8241	5.66558	2.61652	0.583489	1.09893	2	D	24	GH8	SCA6	D-24-GH8-SCA6
D24	152.469	54.6813	22.9061	9.49334	2.41287	0.640787	1.62895	2	D	24	GH8	SCA6	D-24-GH8-SCA6
D24	195.679	55.6018	20.7573	12.6686	1.63848	0.795383	2.029	2	D	24	GH8	SCA6	D-24-GH8-SCA6
D24	58.0247	29.4281	10.5409	7.02728	1.5	0.841974	2.08539	2	D	24	GH8	SCA6	D-24-GH8-SCA6
D24	95.679	43.5702	18.2236	7.11458	2.56144	0.633355	1.47123	2	D	24	GH8	SCA6	D-24-GH8-SCA6
D24	82.0987	34.5234	12.0185	9.55814	1.25741	0.865604	1.30536	2	D	24	GH8	SCA6	D-24-GH8-SCA6
D24	37.037	25.9041	10.5409	4.58123	2.3009	0.693599	2.3554	2	D	24	GH8	SCA6	D-24-GH8-SCA6
D24	121.605	43.031	15.476	10.5409	1.46818	0.825273	2.52182	2	D	24	GH8	SCA6	D-24-GH8-SCA6
D24	82.0987	41.1901	16.9239	7.02728	2.40832	0.608081	0.964947	2	D	24	GH8	SCA6	D-24-GH8-SCA6
D24	60.4938	36.0948	15.1127	4.58123	3.29884	0.583489	5.54481	2	D	24	GH8	SCA6	D-24-GH8-SCA6
D24	56.1728	30.9994	12.6686	7.11458	1.78066	0.734562	0.347155	2	D	24	GH8	SCA6	D-24-GH8-SCA6
D24	83.3333	37.2848	13.7437	9.16246	1.5	0.753294	0.674271	2	D	24	GH8	SCA6	D-24-GH8-SCA6
D24	66.0494	34.1421	13.5628	6.47884	2.09341	0.712028	0.611323	2	D	24	GH8	SCA6	D-24-GH8-SCA6
D24	101.852	40.8088	16.6667	8.67805	1.92055	0.768548	3.03532	2	D	24	GH8	SCA6	D-24-GH8-SCA6
D24	78.395	38.5866	15.9087	6.75862	2.35384	0.661646	1.48849	2	D	24	GH8	SCA6	D-24-GH8-SCA6
D24	85.1852	40.1579	16.178	8.08901	2	0.663791	2.24329	2	D	24	GH8	SCA6	D-24-GH8-SCA6
D24	130.864	49.9673	19.4047	8.46197	2.29317	0.658657	6.35643	2	D	24	GH8	SCA6	D-24-GH8-SCA6
D24	82.716	45.9041	20.0308	5.98352	3.34767	0.493283	2.81821	2	D	24	GH8	SCA6	D-24-GH8-SCA6
D24	53.7037	29.6977	12.0185	6.47884	1.85504	0.765189	0.552881	2	D	24	GH8	SCA6	D-24-GH8-SCA6
D24	71.6049	36.634	15.1127	7.11458	2.12419	0.670479	2.36032	2	D	24	GH8	SCA6	D-24-GH8-SCA6
D24	119.753	45.9041	18.3922	9.49334	1.93738	0.714156	2.18178	2	D	24	GH8	SCA6	D-24-GH8-SCA6
D24	61.7284	34.793	14.1421	6.28539	2.25	0.640783	1.76264	2	D	24	GH8	SCA6	D-24-GH8-SCA6
D24	141.358	47.0942	17.3561	11.8113	1.46945	0.800932	3.20239	2	D	24	GH8	SCA6	D-24-GH8-SCA6
D24	109.259	45.7924	19.7828	8.01234	2.46904	0.654757	1.17335	2	D	24	GH8	SCA6	D-24-GH8-SCA6
D24	62.3457	31.9199	12.4226	7.45356	1.66667	0.768941	0.453246	2	D	24	GH8	SCA6	D-24-GH8-SCA6
D24	116.667	45.2532	17.5682	9.49334	1.85058	0.715908	1.9357	2	D	24	GH8	SCA6	D-24-GH8-SCA6
D48	55.5555	33.4913	13.4256	4.96904	2.70185	0.622407	4.20908	2	D	48	GH8	SCA6	D-48-GH8-SCA6
D48	99.3827	39.507	14.2292	9.55814	1.4887	0.80015	1.23456	2	D	48	GH8	SCA6	D-48-GH8-SCA6
D48	81.4815	41.4597	16.9239	5.98352	2.82843	0.595685	3.1958	2	D	48	GH8	SCA6	D-48-GH8-SCA6
D48	83.3333	44.4907	19.4365	5.55556	3.49857	0.529042	3.73984	2	D	48	GH8	SCA6	D-48-GH8-SCA6
D48	65.4321	40.5392	16.9967	4.58123	3.71008	0.500323	5.55074	2	D	48	GH8	SCA6	D-48-GH8-SCA6
D48	75.3086	37.0152	14.2292	8.01234	1.77591	0.690707	3.04215	2	D	48	GH8	SCA6	D-48-GH8-SCA6
D48	93.8271	38.8562	14.9071	8.46197	1.76166	0.780941	2.08888	2	D	48	GH8	SCA6	D-48-GH8-SCA6
D48	53.0864	33.8725	14.6144	4.58123	3.19006	0.581431	4.30891	2	D	48	GH8	SCA6	D-48-GH8-SCA6
D48	83.9506	44.9836	19.6889	5.66558	3.47519	0.521344	4.42802	2	D	48	GH8	SCA6	D-48-GH8-SCA6
D48	107.407	41.9989	16.9604	8.95806	1.89331	0.765189	0.613541	2	D	48	GH8	SCA6	D-48-GH8-SCA6
D48	69.7531	37.2848	15.1127	5.98352	2.52573	0.630535	2.33253	2	D	48	GH8	SCA6	D-48-GH8-SCA6
D48	88.2716	40.4275	16.5179	7.11458	2.32169	0.678698	0.5686	2	D	48	GH8	SCA6	D-48-GH8-SCA6
D48	108.642	42.3801	16.9604	8.95806	1.89331	0.760121	2.70907	2	D	48	GH8	SCA6	D-48-GH8-SCA6
D48	140.123	52.8404	21.8299	9.16246	2.38253	0.63065	2.587	2	D	48	GH8	SCA6	D-48-GH8-SCA6
D48	130.247	48.9351	18.9215	9.42809	2.00693	0.683495	2.54185	2	D	48	GH8	SCA6	D-48-GH8-SCA6
D48	56.7901	33.8725	13.9222	5.98352	2.32676	0.621996	1.86939	2	D	48	GH8	SCA6	D-48-GH8-SCA6
D48	74.6913	42.1105	16.4054	8.46197	1.93872	0.529296	3.01378	2	D	48	GH8	SCA6	D-48-GH8-SCA6
D48	103.704	41.0784	15.476	8.46197	1.82889	0.772284	2.35573	2	D	48	GH8	SCA6	D-48-GH8-SCA6
D48	139.506	52.1895	21.0818	9.49334	2.2207	0.643631	6.55309	2	D	48	GH8	SCA6	D-48-GH8-SCA6
D48	82.0987	41.1901	17.2491	5.66558	3.04454	0.608081	3.49656	2	D	48	GH8	SCA6	D-48-GH8-SCA6
D48	50.6173	31.269	12.6686	5.55556	2.28035	0.650548	2.00131	2	D	48	GH8	SCA6	D-48-GH8-SCA6
D48	51.8518	29.4281	11.8113	7.11458	1.66015	0.752402	0.986685	2	D	48	GH8	SCA6	D-48-GH8-SCA6
D48	64.8148	34.5234	13.7437	5.66558	2.42582	0.683371	2.60778	2	D	48	GH8	SCA6	D-48-GH8-SCA6
D48	64.1975	31.6503	12.0185	8.01234	1.5	0.805327	2.64302	2	D	48	GH8	SCA6	D-48-GH8-SCA6
D48	55.5555	33.8725	13.9222	6.47884	2.14887	0.608474	2.93179	2	D	48	GH8	SCA6	D-48-GH8-SCA6
D48	118.518	49.0468	20.1231	7.85674	2.56125	0.619119	5.03054	2	D	48	GH8	SCA6	D-48-GH8-SCA6
D48	83.9506	34.793	12.6686	9.55814	1.32543	0.871465	0.827664	2	D	48	GH8	SCA6	D-48-GH8-SCA6
D48	47.5309	32.8404	14.1421	4.71404	3	0.55382	3.04842	2	D	48	GH8	SCA6	D-48-GH8-SCA6
D48	70.9876	41.348	17.5682	5.55556	3.16228	0.521775	1.81302	2	D	48	GH8	SCA6	D-48-GH8-SCA6
D48	56.7901	36.0948	15.1127	5.66558	2.66747	0.547765	2.27908	2	D	48	GH8	SCA6	D-48-GH8-SCA6
D48	80.2469	39.7767	16.5179	6.28539	2.62798	0.637355	2.02861	2	D	48	GH8	SCA6	D-48-GH8-SCA6
D48	54.9383	34.1421	13.9222	4.96904	2.80179	0.592248	4.10119	2	D	48	GH8	SCA6	D-48-GH8-SCA6
D48	59.8765	39.8883	16.9239	4.96904	3.40588	0.472906	0.962724	2	D	48	GH8	SCA6	D-48-GH8-SCA6
D48	75.3086	37.3965	14.8241	5.66558	2.61652	0.676695	5.45003	2	D	48	GH8	SCA6	D-48-GH8-SCA6
D48	122.839	47.4755	18.3922	8.46197	2.17351	0.684872	5.76129	2	D	48	GH8	SCA6	D-48-GH8-SCA6
D48	96.2963	43.3006	17.5682	7.11458	2.46932	0.645403	1.76216	2	D	48	GH8	SCA6	D-48-GH8-SCA6
D48	106.79	49.6977	21.2277	6.75862	3.14084	0.543336	1.98177	2	D	48	GH8	SCA6	D-48-GH8-SCA6
D48	85.1852	40.1579	16.6667	7.11458	2.34261	0.663791	2.38953	2	D	48	GH8	SCA6	D-48-GH8-SCA6
D48	85.1852	38.8562	15.476	7.02728	2.20227	0.709012	2.41977	2	D	48	GH8	SCA6	D-48-GH8-SCA6
D48	88.2716	39.507	16.5179	7.85674	2.10238	0.710692	2.63927	2	D	48	GH8	SCA6	D-48-GH8-SCA6
D48	79.0123	44.6024	19.4047	5.66558	3.42502	0.499102	4.50748	2	D	48	GH8	SCA6	D-48-GH8-SCA6
D48	100.617	39.507	14.4444	9.49334	1.52154	0.81009	1.78046	2	D	48	GH8	SCA6	D-48-GH8-SCA6
D48	66.0494	37.2848	15.1127	6.47884	2.33263	0.597055	4.45592	2	D	48	GH8	SCA6	D-48-GH8-SCA6
D48	32.0988	28.5076	12.6686	3.51364	3.60555	0.496337	1.02794	2	D	48	GH8	SCA6	D-48-GH8-SCA6
D48	111.728	43.4123	16.0247	9.55814	1.67655	0.744986	1.37785	2	D	48	GH8	SCA6	D-48-GH8-SCA6
D48	65.4321	37.0152	15.9087	5.66558	2.80796	0.600122	0.553764	2	D	48	GH8	SCA6	D-48-GH8-SCA6
D48	79.0123	39.2375	15.476	7.02728	2.20227	0.644916	3.78918	2	D	48	GH8	SCA6	D-48-GH8-SCA6
D48	93.8271	37.9357	13.5172	8.95806	1.50895	0.819298	2.82653	2	D	48	GH8	SCA6	D-48-GH8-SCA6
D48	95.679	45.2532	18.3249	7.02728	2.60768	0.58712	0.939501	2	D	48	GH8	SCA6	D-48-GH8-SCA6
D48	80.8642	42.1105	18.3249	5.66558	3.23443	0.573039	0.515378	2	D	48	GH8	SCA6	D-48-GH8-SCA6
D48	79.0123	36.0948	13.4256	7.45356	1.80123	0.762108	1.54582	2	D	48	GH8	SCA6	D-48-GH8-SCA6
D48	75.3086	32.5708	12.0185	8.95806	1.34164	0.892068	0.503703	2	D	48	GH8	SCA6	D-48-GH8-SCA6
D48	90.7407	40.8088	15.9087	8.46197	1.88002	0.684707	3.32361	2	D	48	GH8	SCA6	D-48-GH8-SCA6
D48	76.5432	38.8562	13.0052	9.49334	1.36993	0.637083	1.87828	2	D	48	GH8	SCA6	D-48-GH8-SCA6
D48	114.815	45.5228	16.9604	8.95806	1.89331	0.696224	4.23093	2	D	48	GH8	SCA6	D-48-GH8-SCA6
D48	106.79	43.9515	17.5682	8.08901	2.17186	0.694694	2.75121	2	D	48	GH8	SCA6	D-48-GH8-SCA6
D48	83.9506	38.317	14.8241	6.75862	2.19336	0.71854	4.45305	2	D	48	GH8	SCA6	D-48-GH8-SCA6
D48	53.0864	31.6503	13.4256	5.98352	2.24376	0.665943	1.60641	2	D	48	GH8	SCA6	D-48-GH8-SCA6
D48	79.6296	36.3644	14.2292	8.01234	1.77591	0.756716	1.51243	2	D	48	GH8	SCA6	D-48-GH8-SCA6
D48	70.9876	33.2217	13.3795	7.85674	1.70294	0.808258	2.68097	2	D	48	GH8	SCA6	D-48-GH8-SCA6
D48	71.6049	35.7135	14.9485	6.28539	2.37829	0.705486	3.46675	2	D	48	GH8	SCA6	D-48-GH8-SCA6
D48	137.037	49.0468	19.1807	8.95806	2.14117	0.715857	3.25823	2	D	48	GH8	SCA6	D-48-GH8-SCA6
D48	119.753	44.6024	17.2491	9.16246	1.88258	0.756451	1.6341	2	D	48	GH8	SCA6	D-48-GH8-SCA6
D48	74.0741	38.8562	16.5179	6.28539	2.62798	0.616532	2.49141	2	D	48	GH8	SCA6	D-48-GH8-SCA6
D48	67.2839	33.2217	13.0052	7.02728	1.85068	0.766088	1.40826	2	D	48	GH8	SCA6	D-48-GH8-SCA6
D48	95.679	40.8088	15.9087	7.45356	2.13437	0.72197	2.21144	2	D	48	GH8	SCA6	D-48-GH8-SCA6
D48	62.9629	32.9521	12.6686	5.66558	2.23607	0.728668	4.36849	2	D	48	GH8	SCA6	D-48-GH8-SCA6
D48	74.0741	33.8725	11.8113	9.42809	1.25277	0.811299	0.440879	2	D	48	GH8	SCA6	D-48-GH8-SCA6
D48	37.037	29.8094	12.4226	3.51364	3.53553	0.52377	3.0964	2	D	48	GH8	SCA6	D-48-GH8-SCA6
D48	92.5926	41.4597	16.9604	8.01234	2.11678	0.676915	3.03696	2	D	48	GH8	SCA6	D-48-GH8-SCA6
D48	90.1234	41.0784	16.9239	7.45356	2.27059	0.671152	2.98303	2	D	48	GH8	SCA6	D-48-GH8-SCA6
D48	61.1111	30.9994	11.6003	7.02728	1.65076	0.799139	0.060845	2	D	48	GH8	SCA6	D-48-GH8-SCA6
D48	83.3333	38.5866	15.9087	7.45356	2.13437	0.703325	2.03571	2	D	48	GH8	SCA6	D-48-GH8-SCA6
D48	117.901	47.4755	18.9867	8.08901	2.34722	0.657339	5.90142	2	D	48	GH8	SCA6	D-48-GH8-SCA6
D48	127.16	49.9673	20.2759	8.95806	2.26342	0.640015	1.75924	2	D	48	GH8	SCA6	D-48-GH8-SCA6
D48	29.6296	22.7614	9.42809	4.71404	2	0.718683	0.839597	2	D	48	GH8	SCA6	D-48-GH8-SCA6
D48	89.5062	42.1105	17.5682	7.02728	2.5	0.63428	0.435858	2	D	48	GH8	SCA6	D-48-GH8-SCA6
D48	89.5062	40.4275	16.5179	7.85674	2.10238	0.68819	0.899944	2	D	48	GH8	SCA6	D-48-GH8-SCA6
D48	76.5432	41.4597	16.9967	5.66558	3	0.559583	1.33123	2	D	48	GH8	SCA6	D-48-GH8-SCA6
D48	59.8765	40.2696	16.9967	4.58123	3.71008	0.463994	6.36088	2	D	48	GH8	SCA6	D-48-GH8-SCA6
D48	48.1481	30.7298	12.4226	4.58123	2.71163	0.640721	2.14124	2	D	48	GH8	SCA6	D-48-GH8-SCA6
D48	86.4197	41.4597	16.5179	7.02728	2.35053	0.631788	0.637739	2	D	48	GH8	SCA6	D-48-GH8-SCA6
D48	77.1605	36.3644	14.4871	7.45356	1.94365	0.733252	1.18774	2	D	48	GH8	SCA6	D-48-GH8-SCA6
D48	66.6667	33.8725	12.6686	7.02728	1.80278	0.730169	2.72534	2	D	48	GH8	SCA6	D-48-GH8-SCA6
D48	54.321	34.4117	14.9485	5.55556	2.69073	0.576454	0.78089	2	D	48	GH8	SCA6	D-48-GH8-SCA6
D48	78.395	37.2848	15.1127	8.01234	1.88619	0.708654	1.12367	2	D	48	GH8	SCA6	D-48-GH8-SCA6
D48	69.7531	34.1421	12.6686	7.11458	1.78066	0.751955	4.1462	2	D	48	GH8	SCA6	D-48-GH8-SCA6
D48	40.1234	24.3328	8.95806	6.47884	1.38267	0.851579	1.17594	2	D	48	GH8	SCA6	D-48-GH8-SCA6
D48	183.951	55.3322	21.3726	11.3312	1.88619	0.755014	2.80186	2	D	48	GH8	SCA6	D-48-GH8-SCA6
D48	97.5308	44.6024	18.6256	7.02728	2.65047	0.616078	3.16967	2	D	48	GH8	SCA6	D-48-GH8-SCA6
D48	53.0864	29.4281	11.4396	6.47884	1.76569	0.770316	2.33263	2	D	48	GH8	SCA6	D-48-GH8-SCA6
D48	100.617	43.9515	18.2236	8.01234	2.27444	0.654538	0.584329	2	D	48	GH8	SCA6	D-48-GH8-SCA6
D48	68.5185	34.1421	14.2292	7.11458	2	0.738646	1.12212	2	D	48	GH8	SCA6	D-48-GH8-SCA6
D48	101.852	47.8567	19.6889	7.02728	2.80179	0.558847	5.27644	2	D	48	GH8	SCA6	D-48-GH8-SCA6
D48	107.407	44.2211	17.3916	8.46197	2.05527	0.690216	2.10981	2	D	48	GH8	SCA6	D-48-GH8-SCA6
D48	95.0617	39.2375	14.4444	9.49334	1.52154	0.775915	2.42918	2	D	48	GH8	SCA6	D-48-GH8-SCA6
D48	75.3086	39.6187	16.5179	5.98352	2.76056	0.602912	2.05397	2	D	48	GH8	SCA6	D-48-GH8-SCA6
D48	74.0741	37.9357	15.476	7.02728	2.20227	0.646815	3.75529	2	D	48	GH8	SCA6	D-48-GH8-SCA6
D48	113.58	43.3006	16.5179	9.42809	1.75198	0.761245	1.37722	2	D	48	GH8	SCA6	D-48-GH8-SCA6
D48	74.0741	35.7135	13.7437	7.02728	1.95576	0.729813	2.02563	2	D	48	GH8	SCA6	D-48-GH8-SCA6
D48	75.9259	35.4439	13.5628	8.01234	1.69274	0.759482	0.815322	2	D	48	GH8	SCA6	D-48-GH8-SCA6
D0	104.938	47.3638	19.7828	8.01234	2.46904	0.587829	1.06837	3	D	0	GH8	SCA6	D-0-GH8-SCA6
D0	112.963	44.872	18.2236	8.67805	2.09996	0.705011	3.9425	3	D	0	GH8	SCA6	D-0-GH8-SCA6
D0	55.5555	33.4913	14.1421	6.28539	2.25	0.622407	0.711253	3	D	0	GH8	SCA6	D-0-GH8-SCA6
D0	83.9506	41.0784	17.3916	6.47884	2.68438	0.625182	1.91054	3	D	0	GH8	SCA6	D-0-GH8-SCA6
D0	104.321	40.8088	15.7919	10.2439	1.54158	0.78718	0.571142	3	D	0	GH8	SCA6	D-0-GH8-SCA6
D0	103.086	42.6497	17.3561	8.67805	2	0.712161	1.36588	3	D	0	GH8	SCA6	D-0-GH8-SCA6
D0	85.8025	39.507	16.6667	7.11458	2.34261	0.690813	0.819892	3	D	0	GH8	SCA6	D-0-GH8-SCA6
D0	97.5308	43.3006	18.2236	8.01234	2.27444	0.653678	1.99449	3	D	0	GH8	SCA6	D-0-GH8-SCA6
D0	50	30.9994	12.4226	4.96904	2.5	0.653841	3.25508	3	D	0	GH8	SCA6	D-0-GH8-SCA6
D0	37.037	27.2059	10.9432	4.00617	2.73158	0.628812	1.45037	3	D	0	GH8	SCA6	D-0-GH8-SCA6
D0	102.469	43.3006	17.5682	8.08901	2.17186	0.686775	2.63015	3	D	0	GH8	SCA6	D-0-GH8-SCA6
D0	133.333	47.7451	19.4047	9.93808	1.95256	0.735007	0.722151	3	D	0	GH8	SCA6	D-0-GH8-SCA6
D0	67.2839	37.6661	15.7135	5.66558	2.7735	0.595964	0.397802	3	D	0	GH8	SCA6	D-0-GH8-SCA6
D0	108.025	43.9515	17.5682	9.55814	1.83804	0.702725	1.85379	3	D	0	GH8	SCA6	D-0-GH8-SCA6
D0	69.1358	37.0152	15.476	7.02728	2.20227	0.634092	0.375726	3	D	0	GH8	SCA6	D-0-GH8-SCA6
D0	87.037	37.6661	14.4871	8.95806	1.61722	0.770926	0.390043	3	D	0	GH8	SCA6	D-0-GH8-SCA6
D0	123.457	49.586	20.4879	8.67805	2.36088	0.630967	2.4926	3	D	0	GH8	SCA6	D-0-GH8-SCA6
D0	98.1481	39.507	15.476	8.46197	1.82889	0.79021	2.06332	3	D	0	GH8	SCA6	D-0-GH8-SCA6
D0	120.988	43.3006	16.5179	9.49334	1.73994	0.810891	2.12747	3	D	0	GH8	SCA6	D-0-GH8-SCA6
D0	103.086	44.3328	18.0876	6.75862	2.67622	0.659116	0.743645	3	D	0	GH8	SCA6	D-0-GH8-SCA6
D0	106.173	49.586	20.6679	7.11458	2.905	0.542631	3.22551	3	D	0	GH8	SCA6	D-0-GH8-SCA6
D0	82.716	40.6971	17.3561	6.28539	2.76134	0.627584	0.970053	3	D	0	GH8	SCA6	D-0-GH8-SCA6
D0	118.518	48.6655	19.8762	8.46197	2.34888	0.628858	2.21896	3	D	0	GH8	SCA6	D-0-GH8-SCA6
D0	123.457	45.5228	16.9604	10.4822	1.61802	0.748628	2.0527	3	D	0	GH8	SCA6	D-0-GH8-SCA6
D0	103.086	44.3328	17.5682	8.08901	2.17186	0.659116	0.576209	3	D	0	GH8	SCA6	D-0-GH8-SCA6
D0	60.4938	30.3486	11.4396	7.45356	1.53478	0.825362	1.22706	3	D	0	GH8	SCA6	D-0-GH8-SCA6
D0	128.395	47.7451	18.8562	9.42809	2	0.707785	3.40552	3	D	0	GH8	SCA6	D-0-GH8-SCA6
D0	130.864	51.269	21.0818	8.08901	2.60623	0.625634	3.76872	3	D	0	GH8	SCA6	D-0-GH8-SCA6
D0	105.556	40.8088	15.1127	9.16246	1.64942	0.796495	2.7565	3	D	0	GH8	SCA6	D-0-GH8-SCA6
D0	83.9506	39.2375	15.9087	7.45356	2.13437	0.685223	0.125193	3	D	0	GH8	SCA6	D-0-GH8-SCA6
D0	142.593	48.3959	18.6256	10.5409	1.76698	0.765048	2.49735	3	D	0	GH8	SCA6	D-0-GH8-SCA6
D0	66.6667	41.0784	17.3561	5.55556	3.1241	0.496468	2.01491	3	D	0	GH8	SCA6	D-0-GH8-SCA6
D0	75.3086	43.3006	18.2236	5.55556	3.28024	0.504738	4.1688	3	D	0	GH8	SCA6	D-0-GH8-SCA6
D0	112.346	43.3006	16.4054	9.93808	1.65076	0.75297	1.87471	3	D	0	GH8	SCA6	D-0-GH8-SCA6
D0	79.0123	34.793	13.4256	8.46197	1.58658	0.820202	0.922849	3	D	0	GH8	SCA6	D-0-GH8-SCA6
D0	108.642	45.5228	18.2236	8.67805	2.09996	0.658793	0.942506	3	D	0	GH8	SCA6	D-0-GH8-SCA6
D0	115.432	46.1737	19.1163	9.55814	2	0.680372	1.20195	3	D	0	GH8	SCA6	D-0-GH8-SCA6
D0	80.8642	35.4439	14.2292	8.67805	1.63967	0.808879	1.89887	3	D	0	GH8	SCA6	D-0-GH8-SCA6
D0	146.914	50.8878	20.8759	9.93808	2.1006	0.712927	1.34435	3	D	0	GH8	SCA6	D-0-GH8-SCA6
D0	130.247	46.1737	17.9505	10.9432	1.64034	0.767693	0.487218	3	D	0	GH8	SCA6	D-0-GH8-SCA6
D0	120.37	43.9515	16.9967	9.16246	1.85504	0.783037	3.04778	3	D	0	GH8	SCA6	D-0-GH8-SCA6
D0	133.333	45.5228	16.9239	10.9432	1.54653	0.808518	1.95531	3	D	0	GH8	SCA6	D-0-GH8-SCA6
D0	121.605	48.0147	19.4047	8.46197	2.29317	0.662847	3.25051	3	D	0	GH8	SCA6	D-0-GH8-SCA6
D0	130.864	47.7451	19.4047	10.9432	1.77323	0.721396	0.4104	3	D	0	GH8	SCA6	D-0-GH8-SCA6
D0	99.3827	41.7293	16.6667	8.67805	1.92055	0.717198	0.518	3	D	0	GH8	SCA6	D-0-GH8-SCA6
D24	75.9259	35.0626	13.4256	8.46197	1.58658	0.776089	1.07305	3	D	24	GH8	SCA6	D-24-GH8-SCA6
D24	124.074	43.9515	16.178	10.5409	1.53478	0.80713	1.02839	3	D	24	GH8	SCA6	D-24-GH8-SCA6
D24	108.642	41.0784	15.1127	10.5409	1.43372	0.809059	1.77779	3	D	24	GH8	SCA6	D-24-GH8-SCA6
D24	78.395	36.3644	14.0546	8.08901	1.73749	0.744984	1.33648	3	D	24	GH8	SCA6	D-24-GH8-SCA6
D24	83.9506	38.8562	15.1127	7.11458	2.12419	0.698737	2.84607	3	D	24	GH8	SCA6	D-24-GH8-SCA6
D24	77.7778	34.793	13.0052	8.46197	1.5369	0.807386	0.801047	3	D	24	GH8	SCA6	D-24-GH8-SCA6
D24	66.6667	34.4117	14.2292	6.28539	2.26385	0.707466	0.384615	3	D	24	GH8	SCA6	D-24-GH8-SCA6
D24	69.1358	31.6503	10.9432	8.46197	1.29322	0.867275	0.936426	3	D	24	GH8	SCA6	D-24-GH8-SCA6
D24	93.2099	40.8088	15.7135	7.85674	2	0.703338	0.214856	3	D	24	GH8	SCA6	D-24-GH8-SCA6
D24	73.4568	34.1421	12.9577	7.45356	1.73845	0.791882	2.98295	3	D	24	GH8	SCA6	D-24-GH8-SCA6
D24	105.556	39.8883	14.2292	11.1111	1.28062	0.83368	0.969229	3	D	24	GH8	SCA6	D-24-GH8-SCA6
D24	87.037	38.5866	15.1127	8.67805	1.74149	0.734584	1.71279	3	D	24	GH8	SCA6	D-24-GH8-SCA6
D24	94.4444	40.8088	16.5179	8.67805	1.90341	0.712654	0.252525	3	D	24	GH8	SCA6	D-24-GH8-SCA6
D24	103.086	41.348	15.9087	8.46197	1.88002	0.757709	0.993014	3	D	24	GH8	SCA6	D-24-GH8-SCA6
D24	107.407	41.9989	16.178	9.16246	1.76569	0.765189	1.37853	3	D	24	GH8	SCA6	D-24-GH8-SCA6
D24	146.296	50.6182	18.0876	11.3312	1.59627	0.717514	4.00552	3	D	24	GH8	SCA6	D-24-GH8-SCA6
D24	122.222	43.3006	16.0247	11.1111	1.44222	0.819166	2.04626	3	D	24	GH8	SCA6	D-24-GH8-SCA6
D24	106.173	40.1579	14.4444	9.93808	1.45344	0.827334	0.905097	3	D	24	GH8	SCA6	D-24-GH8-SCA6
D24	72.2222	34.1421	12.9577	7.45356	1.73845	0.778573	2.81526	3	D	24	GH8	SCA6	D-24-GH8-SCA6
D24	122.222	42.3801	15.436	10.4822	1.4726	0.855136	3.10261	3	D	24	GH8	SCA6	D-24-GH8-SCA6
D24	107.407	41.0784	15.476	9.49334	1.6302	0.799866	1.99919	3	D	24	GH8	SCA6	D-24-GH8-SCA6
D24	127.778	46.555	17.5682	9.49334	1.85058	0.740854	2.99023	3	D	24	GH8	SCA6	D-24-GH8-SCA6
D24	127.16	51.269	21.0818	8.46197	2.49136	0.607927	0.341362	3	D	24	GH8	SCA6	D-24-GH8-SCA6
D24	118.518	43.3006	16.4054	9.93808	1.65076	0.794342	0.718242	3	D	24	GH8	SCA6	D-24-GH8-SCA6
D24	108.025	51.5386	21.9145	7.45356	2.94014	0.511054	5.34479	3	D	24	GH8	SCA6	D-24-GH8-SCA6
D24	58.642	33.2217	12.6686	7.11458	1.78066	0.667691	3.43258	3	D	24	GH8	SCA6	D-24-GH8-SCA6
D24	89.5062	38.5866	15.436	8.95806	1.72315	0.755423	1.31615	3	D	24	GH8	SCA6	D-24-GH8-SCA6
D24	136.42	46.1737	16.9604	12.0185	1.41119	0.804077	2.32839	3	D	24	GH8	SCA6	D-24-GH8-SCA6
D24	118.518	44.6024	17.5682	9.49334	1.85058	0.748652	2.87186	3	D	24	GH8	SCA6	D-24-GH8-SCA6
D24	144.444	45.5228	15.1127	12.6686	1.19293	0.875895	1.3874	3	D	24	GH8	SCA6	D-24-GH8-SCA6
D24	120.37	43.031	16.4054	11.4396	1.43409	0.816895	1.79183	3	D	24	GH8	SCA6	D-24-GH8-SCA6
D24	98.7654	42.3801	17.5682	8.95806	1.96116	0.691019	1.40764	3	D	24	GH8	SCA6	D-24-GH8-SCA6
D24	87.6543	37.9357	14.9071	8.46197	1.76166	0.765397	0.632612	3	D	24	GH8	SCA6	D-24-GH8-SCA6
D24	67.9012	34.4117	14.2292	6.28539	2.26385	0.720567	2.41616	3	D	24	GH8	SCA6	D-24-GH8-SCA6
D24	137.654	47.0942	18.2236	11.1111	1.64012	0.779947	1.45373	3	D	24	GH8	SCA6	D-24-GH8-SCA6
D24	45.0617	28.7772	11.6003	5.66558	2.04751	0.683786	2.66307	3	D	24	GH8	SCA6	D-24-GH8-SCA6
D24	33.3333	24.0632	8.46197	5.98352	1.41421	0.723407	0.543333	3	D	24	GH8	SCA6	D-24-GH8-SCA6
D24	144.444	47.7451	18.2236	11.1111	1.64012	0.796258	2.11791	3	D	24	GH8	SCA6	D-24-GH8-SCA6
D24	115.432	42.6497	15.9087	9.16246	1.73629	0.79745	2.47497	3	D	24	GH8	SCA6	D-24-GH8-SCA6
D24	95.679	41.7293	15.476	9.49334	1.6302	0.69047	3.21869	3	D	24	GH8	SCA6	D-24-GH8-SCA6
D24	66.6667	32.5708	12.4226	7.45356	1.66667	0.7897	1.13791	3	D	24	GH8	SCA6	D-24-GH8-SCA6
D24	96.2963	40.1579	14.8241	9.16246	1.61791	0.750372	0.309601	3	D	24	GH8	SCA6	D-24-GH8-SCA6
D24	98.7654	43.3006	17.5682	8.08901	2.17186	0.661952	1.41175	3	D	24	GH8	SCA6	D-24-GH8-SCA6
D24	61.1111	35.0626	14.9485	6.28539	2.37829	0.624657	0.93202	3	D	24	GH8	SCA6	D-24-GH8-SCA6
D24	96.2963	37.9357	14.0546	9.49334	1.48047	0.840859	1.49071	3	D	24	GH8	SCA6	D-24-GH8-SCA6
D24	100.617	41.7293	16.5179	8.67805	1.90341	0.726107	3.60541	3	D	24	GH8	SCA6	D-24-GH8-SCA6
D24	140.123	49.3164	20.3973	11.4396	1.78304	0.723998	0.239405	3	D	24	GH8	SCA6	D-24-GH8-SCA6
D24	84.5679	37.6661	14.9071	8.46197	1.76166	0.749055	0.602308	3	D	24	GH8	SCA6	D-24-GH8-SCA6
D24	101.235	40.1579	15.7919	9.55814	1.65219	0.788853	0.966794	3	D	24	GH8	SCA6	D-24-GH8-SCA6
D24	109.259	41.7293	15.9087	9.16246	1.73629	0.788472	2.33148	3	D	24	GH8	SCA6	D-24-GH8-SCA6
D24	66.6667	32.5708	12.6686	7.02728	1.80278	0.7897	0.86112	3	D	24	GH8	SCA6	D-24-GH8-SCA6
D24	85.8025	40.8088	16.178	7.02728	2.30217	0.647444	3.55097	3	D	24	GH8	SCA6	D-24-GH8-SCA6
D24	74.0741	34.793	13.4256	7.45356	1.80123	0.768939	1.15616	3	D	24	GH8	SCA6	D-24-GH8-SCA6
D24	105.556	44.4907	18.0876	7.11458	2.54232	0.67012	2.97926	3	D	24	GH8	SCA6	D-24-GH8-SCA6
D24	118.518	47.7451	19.1163	8.01234	2.38586	0.65334	3.99466	3	D	24	GH8	SCA6	D-24-GH8-SCA6
D24	85.1852	36.634	14.2292	8.01234	1.77591	0.797639	1.7338	3	D	24	GH8	SCA6	D-24-GH8-SCA6
D24	82.716	41.9989	17.9161	6.47884	2.76533	0.589284	3.30956	3	D	24	GH8	SCA6	D-24-GH8-SCA6
D24	63.5802	34.1421	14.2292	7.11458	2	0.68541	1.07792	3	D	24	GH8	SCA6	D-24-GH8-SCA6
D48	110.494	41.7293	15.7919	10.2439	1.54158	0.797382	0.55484	3	D	48	GH8	SCA6	D-48-GH8-SCA6
D48	113.58	44.6024	17.9161	8.95806	2	0.717458	4.34195	3	D	48	GH8	SCA6	D-48-GH8-SCA6
D48	98.7654	42.3801	15.9087	9.16246	1.73629	0.691019	2.21167	3	D	48	GH8	SCA6	D-48-GH8-SCA6
D48	107.407	40.1579	15.436	10.4822	1.4726	0.836954	1.50868	3	D	48	GH8	SCA6	D-48-GH8-SCA6
D48	114.815	49.586	20.3973	8.01234	2.54574	0.586799	4.6135	3	D	48	GH8	SCA6	D-48-GH8-SCA6
D48	101.235	45.1416	19.1163	8.01234	2.38586	0.624288	2.08388	3	D	48	GH8	SCA6	D-48-GH8-SCA6
D48	82.716	41.0784	16.5179	6.28539	2.62798	0.615988	2.91561	3	D	48	GH8	SCA6	D-48-GH8-SCA6
D48	117.901	43.5702	15.1127	9.49334	1.59193	0.780456	3.69166	3	D	48	GH8	SCA6	D-48-GH8-SCA6
D48	103.704	42.3801	16.4054	8.95806	1.83135	0.72557	0.209252	3	D	48	GH8	SCA6	D-48-GH8-SCA6
D48	91.9753	40.4275	16.0247	8.01234	2	0.707175	2.40571	3	D	48	GH8	SCA6	D-48-GH8-SCA6
D48	84.5679	36.3644	13.5628	9.55814	1.41898	0.803644	0.517713	3	D	48	GH8	SCA6	D-48-GH8-SCA6
D48	77.7778	37.0152	15.476	7.02728	2.20227	0.713353	1.55795	3	D	48	GH8	SCA6	D-48-GH8-SCA6
D48	60.4938	33.8725	13.7437	5.66558	2.42582	0.66256	2.06959	3	D	48	GH8	SCA6	D-48-GH8-SCA6
D48	120.37	41.7293	14.4444	11.967	1.20702	0.868656	1.32049	3	D	48	GH8	SCA6	D-48-GH8-SCA6
D48	116.049	43.6819	16.6667	11.1111	1.5	0.764275	0.769627	3	D	48	GH8	SCA6	D-48-GH8-SCA6
D48	66.6667	33.4913	13.4256	7.45356	1.80123	0.746888	1.32139	3	D	48	GH8	SCA6	D-48-GH8-SCA6
D48	124.691	44.2211	16.5179	10.5409	1.56702	0.801285	1.27273	3	D	48	GH8	SCA6	D-48-GH8-SCA6
D48	77.1605	35.0626	13.5628	8.01234	1.69274	0.788708	0.376076	3	D	48	GH8	SCA6	D-48-GH8-SCA6
D48	41.9753	27.2059	10.9432	4.96904	2.20227	0.712654	1.32184	3	D	48	GH8	SCA6	D-48-GH8-SCA6
D48	63.5802	31.9199	11.6003	7.02728	1.65076	0.784167	2.49731	3	D	48	GH8	SCA6	D-48-GH8-SCA6
D48	107.407	42.3801	16.6667	10.2439	1.62698	0.751483	0.933903	3	D	48	GH8	SCA6	D-48-GH8-SCA6
D48	117.284	46.8246	19.4047	8.08901	2.3989	0.672203	0.711441	3	D	48	GH8	SCA6	D-48-GH8-SCA6
D48	66.6667	33.4913	13.0052	7.02728	1.85068	0.746888	2.59954	3	D	48	GH8	SCA6	D-48-GH8-SCA6
D48	95.679	42.6497	17.3561	8.67805	2	0.660988	2.49607	3	D	48	GH8	SCA6	D-48-GH8-SCA6
D48	72.2222	34.5234	12.6686	8.67805	1.45985	0.761471	2.02134	3	D	48	GH8	SCA6	D-48-GH8-SCA6
D48	95.0617	41.4597	15.1127	9.16246	1.64942	0.694966	0.53105	3	D	48	GH8	SCA6	D-48-GH8-SCA6
D48	93.2099	43.031	17.3916	7.45356	2.33333	0.63257	2.37989	3	D	48	GH8	SCA6	D-48-GH8-SCA6
D48	107.407	43.3006	16.4054	8.95806	1.83135	0.719873	1.87748	3	D	48	GH8	SCA6	D-48-GH8-SCA6
D48	85.8025	38.5866	14.8241	8.08901	1.83262	0.724164	0.402924	3	D	48	GH8	SCA6	D-48-GH8-SCA6
D48	65.4321	32.5708	11.967	7.02728	1.70294	0.775076	2.03634	3	D	48	GH8	SCA6	D-48-GH8-SCA6
D48	66.6667	31.269	11.4396	8.01234	1.42775	0.85682	0.775377	3	D	48	GH8	SCA6	D-48-GH8-SCA6
D48	77.7778	34.793	13.5628	8.67805	1.56289	0.807386	1.67675	3	D	48	GH8	SCA6	D-48-GH8-SCA6
D48	90.7407	38.5866	14.8241	8.08901	1.83262	0.765843	1.3931	3	D	48	GH8	SCA6	D-48-GH8-SCA6
D48	117.901	41.7293	15.9087	10.9432	1.45375	0.850837	0.565667	3	D	48	GH8	SCA6	D-48-GH8-SCA6
D48	104.321	41.7293	15.9087	9.16246	1.73629	0.752835	0.540492	3	D	48	GH8	SCA6	D-48-GH8-SCA6
D48	98.7654	41.4597	15.9087	8.46197	1.88002	0.722043	2.39283	3	D	48	GH8	SCA6	D-48-GH8-SCA6
D48	106.79	40.8088	14.9071	9.93808	1.5	0.805811	0.719783	3	D	48	GH8	SCA6	D-48-GH8-SCA6
D48	92.5926	45.9041	18.9867	7.02728	2.70185	0.552183	5.16293	3	D	48	GH8	SCA6	D-48-GH8-SCA6
D48	78.395	38.5866	15.1127	7.02728	2.15058	0.661646	2.05209	3	D	48	GH8	SCA6	D-48-GH8-SCA6
D48	119.136	43.9515	16.4054	8.95806	1.83135	0.775005	3.98691	3	D	48	GH8	SCA6	D-48-GH8-SCA6
D48	143.21	47.7451	16.9967	11.3312	1.5	0.789452	1.38912	3	D	48	GH8	SCA6	D-48-GH8-SCA6
D48	90.7407	38.2053	14.4871	8.95806	1.61722	0.781205	1.37958	3	D	48	GH8	SCA6	D-48-GH8-SCA6
D48	78.395	37.6661	15.476	7.02728	2.20227	0.69438	0.894533	3	D	48	GH8	SCA6	D-48-GH8-SCA6
D48	45.0617	25.2532	8.46197	7.45356	1.13529	0.887939	1.10269	3	D	48	GH8	SCA6	D-48-GH8-SCA6
D48	111.728	41.7293	16.0247	10.4822	1.52875	0.806291	1.40384	3	D	48	GH8	SCA6	D-48-GH8-SCA6
D48	122.839	46.1737	17.3916	9.93808	1.75	0.724033	4.94338	3	D	48	GH8	SCA6	D-48-GH8-SCA6
D48	125.309	49.3164	19.6889	9.16246	2.14887	0.647452	0.656989	3	D	48	GH8	SCA6	D-48-GH8-SCA6
D48	111.111	41.0784	15.1127	10.5409	1.43372	0.827447	0.718893	3	D	48	GH8	SCA6	D-48-GH8-SCA6
D48	49.3827	30.3486	12.4226	5.66558	2.19265	0.673765	0.237557	3	D	48	GH8	SCA6	D-48-GH8-SCA6
D48	106.173	41.9989	16.5179	8.67805	1.90341	0.756394	2.87702	3	D	48	GH8	SCA6	D-48-GH8-SCA6
D48	164.815	52.4591	20.0308	10.4822	1.91094	0.7526	2.3055	3	D	48	GH8	SCA6	D-48-GH8-SCA6
D48	109.877	44.6024	17.3916	8.95806	1.94145	0.694063	2.30347	3	D	48	GH8	SCA6	D-48-GH8-SCA6
D48	68.5185	34.1421	13.5628	6.47884	2.09341	0.738646	2.9794	3	D	48	GH8	SCA6	D-48-GH8-SCA6
D48	103.086	40.8088	15.7919	10.2439	1.54158	0.777864	1.74978	3	D	48	GH8	SCA6	D-48-GH8-SCA6
D48	83.3333	36.3644	14.9485	7.85674	1.90263	0.791912	1.95319	3	D	48	GH8	SCA6	D-48-GH8-SCA6
L0	77.7778	34.793	13.5628	8.01234	1.69274	0.807386	2.13304	1	L	0	GH21	SCA6	L-0-GH21-SCA6
L0	57.4074	28.7772	10.5409	7.02728	1.5	0.871125	1.44452	1	L	0	GH21	SCA6	L-0-GH21-SCA6
L0	43.2099	26.2854	10.2439	6.28539	1.6298	0.785894	0.36316	1	L	0	GH21	SCA6	L-0-GH21-SCA6
L0	46.9136	27.2059	10.4822	6.47884	1.61791	0.796495	1.90181	1	L	0	GH21	SCA6	L-0-GH21-SCA6
L0	58.0247	30.3486	11.1111	7.11458	1.56174	0.791674	1.30336	1	L	0	GH21	SCA6	L-0-GH21-SCA6
L0	56.1728	31.9199	13.3795	6.28539	2.12867	0.692808	2.66512	1	L	0	GH21	SCA6	L-0-GH21-SCA6
L0	32.0988	26.2854	10.9432	4.96904	2.20227	0.583807	2.34346	1	L	0	GH21	SCA6	L-0-GH21-SCA6
L0	77.7778	35.7135	13.4256	8.46197	1.58658	0.766304	1.83325	1	L	0	GH21	SCA6	L-0-GH21-SCA6
L0	120.37	44.872	16.9604	11.4396	1.4826	0.751241	1.59752	1	L	0	GH21	SCA6	L-0-GH21-SCA6
L0	80.2469	35.7135	13.5628	8.67805	1.56289	0.790631	1.48492	1	L	0	GH21	SCA6	L-0-GH21-SCA6
L0	37.6543	23.031	8.08901	7.02728	1.15109	0.892068	0.492634	1	L	0	GH21	SCA6	L-0-GH21-SCA6
L0	40.1234	26.555	10.9994	5.55556	1.9799	0.715016	0.426574	1	L	0	GH21	SCA6	L-0-GH21-SCA6
L0	62.9629	33.4913	13.5172	6.75862	2	0.705394	1.84215	1	L	0	GH21	SCA6	L-0-GH21-SCA6
L0	35.1852	25.6345	10.5409	4.58123	2.3009	0.672852	2.09771	1	L	0	GH21	SCA6	L-0-GH21-SCA6
L0	60.4938	39.7767	17.3561	5.55556	3.1241	0.480468	0.477291	1	L	0	GH21	SCA6	L-0-GH21-SCA6
L0	51.2346	30.9994	12.0185	5.55556	2.16333	0.669985	3.94234	1	L	0	GH21	SCA6	L-0-GH21-SCA6
L0	99.3827	42.6497	16.9604	8.95806	1.89331	0.686575	3.81373	1	L	0	GH21	SCA6	L-0-GH21-SCA6
L0	46.2963	29.6977	11.8113	5.55556	2.12603	0.659646	0.83304	1	L	0	GH21	SCA6	L-0-GH21-SCA6
L0	21.6049	20.2696	7.85674	3.33333	2.35702	0.660804	2.11243	1	L	0	GH21	SCA6	L-0-GH21-SCA6
L0	259.259	63.8398	23.7788	15.1127	1.57343	0.799394	2.0785	1	L	0	GH21	SCA6	L-0-GH21-SCA6
L0	27.1605	22.7614	9.55814	4.00617	2.38586	0.658793	1.28852	1	L	0	GH21	SCA6	L-0-GH21-SCA6
L0	96.2963	37.9357	13.4256	9.93808	1.35093	0.840859	0.625866	1	L	0	GH21	SCA6	L-0-GH21-SCA6
L0	65.4321	31.269	11.1111	8.01234	1.38675	0.840953	1.37657	1	L	0	GH21	SCA6	L-0-GH21-SCA6
L0	37.037	27.2059	11.1111	4.00617	2.7735	0.628812	3.00706	1	L	0	GH21	SCA6	L-0-GH21-SCA6
L0	88.8889	36.0948	12.4226	9.93808	1.25	0.857372	2.02894	1	L	0	GH21	SCA6	L-0-GH21-SCA6
L0	67.9012	31.6503	11.4396	8.95806	1.27702	0.851788	1.50351	1	L	0	GH21	SCA6	L-0-GH21-SCA6
L0	131.481	46.555	16.9967	9.16246	1.85504	0.762328	5.3924	1	L	0	GH21	SCA6	L-0-GH21-SCA6
L0	143.21	45.5228	15.436	13.9222	1.10874	0.868408	1.31293	1	L	0	GH21	SCA6	L-0-GH21-SCA6
L0	78.395	35.9831	12.9577	8.01234	1.61722	0.760855	1.57709	1	L	0	GH21	SCA6	L-0-GH21-SCA6
L0	95.679	41.7293	16.9967	7.85674	2.16333	0.69047	1.28043	1	L	0	GH21	SCA6	L-0-GH21-SCA6
L0	97.5308	40.1579	15.7135	7.85674	2	0.759993	0.483724	1	L	0	GH21	SCA6	L-0-GH21-SCA6
L0	146.914	49.0468	17.9161	10.0615	1.78066	0.76745	5.39914	1	L	0	GH21	SCA6	L-0-GH21-SCA6
L0	53.0864	31.269	12.4226	6.75862	1.83804	0.682282	1.92094	1	L	0	GH21	SCA6	L-0-GH21-SCA6
L0	93.8271	38.8562	14.9071	8.95806	1.6641	0.780941	0.300637	1	L	0	GH21	SCA6	L-0-GH21-SCA6
L0	77.1605	38.2053	14.4444	9.49334	1.52154	0.66429	0.350552	1	L	0	GH21	SCA6	L-0-GH21-SCA6
L0	198.765	54.9509	19.4047	14.8241	1.309	0.827181	1.88957	1	L	0	GH21	SCA6	L-0-GH21-SCA6
L0	82.0987	35.0626	11.6003	9.49334	1.22195	0.839186	0.501921	1	L	0	GH21	SCA6	L-0-GH21-SCA6
L0	108.025	39.507	12.9577	11.4396	1.1327	0.869728	0.685239	1	L	0	GH21	SCA6	L-0-GH21-SCA6
L0	206.173	59.3954	21.9145	12.9577	1.69124	0.734406	0.919069	1	L	0	GH21	SCA6	L-0-GH21-SCA6
L0	104.321	39.507	12.6686	11.8113	1.07259	0.839909	0.534856	1	L	0	GH21	SCA6	L-0-GH21-SCA6
L0	107.407	40.1579	14.8241	9.16246	1.61791	0.836954	2.81986	1	L	0	GH21	SCA6	L-0-GH21-SCA6
L0	126.543	43.9515	16.6667	11.1111	1.5	0.823192	1.49847	1	L	0	GH21	SCA6	L-0-GH21-SCA6
L0	106.79	39.507	13.5172	10.2439	1.31954	0.859789	2.11862	1	L	0	GH21	SCA6	L-0-GH21-SCA6
L0	169.136	50.8878	18.3249	12.6686	1.44648	0.820765	1.51622	1	L	0	GH21	SCA6	L-0-GH21-SCA6
L0	179.63	52.8404	19.4047	11.3312	1.71251	0.808455	4.56492	1	L	0	GH21	SCA6	L-0-GH21-SCA6
L0	55.5555	30.3486	11.8113	7.11458	1.66015	0.757986	0.870796	1	L	0	GH21	SCA6	L-0-GH21-SCA6
L0	50.6173	28.1263	10.5409	7.02728	1.5	0.804048	1.0101	1	L	0	GH21	SCA6	L-0-GH21-SCA6
L24	208.642	54.4117	18.3922	14.9071	1.23378	0.885577	1.05516	1	L	24	GH21	SCA6	L-24-GH21-SCA6
L24	198.765	53.4913	20.0308	14.4871	1.38267	0.872941	1.1477	1	L	24	GH21	SCA6	L-24-GH21-SCA6
L24	77.7778	34.2538	12.5708	10.9994	1.14286	0.833005	0.785674	1	L	24	GH21	SCA6	L-24-GH21-SCA6
L24	110.494	41.1901	15.7919	11.1111	1.42127	0.818395	0.689436	1	L	24	GH21	SCA6	L-24-GH21-SCA6
L24	162.346	48.7772	16.6667	15.1127	1.10282	0.857465	1.73045	1	L	24	GH21	SCA6	L-24-GH21-SCA6
L24	154.321	47.7451	18.9215	11.1111	1.70294	0.850703	3.76664	1	L	24	GH21	SCA6	L-24-GH21-SCA6
L24	198.148	55.0626	20.6679	13.5628	1.52386	0.821271	1.27607	1	L	24	GH21	SCA6	L-24-GH21-SCA6
L24	133.333	44.9836	16.4054	11.4396	1.43409	0.828017	0.546733	1	L	24	GH21	SCA6	L-24-GH21-SCA6
L24	136.42	46.555	18.2236	11.1111	1.64012	0.79096	0.601944	1	L	24	GH21	SCA6	L-24-GH21-SCA6
L24	195.062	53.4913	18.9215	15.7919	1.19818	0.856675	0.253785	1	L	24	GH21	SCA6	L-24-GH21-SCA6
L24	112.963	41.1901	14.4871	12.0185	1.2054	0.836683	0.446512	1	L	24	GH21	SCA6	L-24-GH21-SCA6
L24	120.37	42.6497	16.0247	10.4822	1.52875	0.831565	2.01322	1	L	24	GH21	SCA6	L-24-GH21-SCA6
L24	112.963	39.8883	14.2292	11.8113	1.20471	0.892184	1.95194	1	L	24	GH21	SCA6	L-24-GH21-SCA6
L24	61.7284	29.4281	9.93808	8.95806	1.1094	0.895717	0.227852	1	L	24	GH21	SCA6	L-24-GH21-SCA6
L24	219.753	59.2374	20.9644	16.9604	1.23608	0.786959	1.10959	1	L	24	GH21	SCA6	L-24-GH21-SCA6
L24	154.321	49.0468	19.6576	11.8113	1.6643	0.806145	0.078567	1	L	24	GH21	SCA6	L-24-GH21-SCA6
L24	143.827	50.079	18.8889	11.4396	1.65119	0.720676	2.92801	1	L	24	GH21	SCA6	L-24-GH21-SCA6
L24	33.3333	24.0632	9.55814	5.55556	1.72046	0.723407	0.272803	1	L	24	GH21	SCA6	L-24-GH21-SCA6
L24	62.9629	32.5708	13.0052	7.02728	1.85068	0.745828	0.487295	1	L	24	GH21	SCA6	L-24-GH21-SCA6
L24	46.2963	28.7772	11.8113	5.55556	2.12603	0.70252	3.20741	1	L	24	GH21	SCA6	L-24-GH21-SCA6
L24	46.9136	27.2059	9.55814	7.11458	1.34346	0.796495	1.33337	1	L	24	GH21	SCA6	L-24-GH21-SCA6
L24	42.5926	26.555	9.93808	5.98352	1.66091	0.759017	1.31559	1	L	24	GH21	SCA6	L-24-GH21-SCA6
L24	53.0864	29.4281	10.5409	7.02728	1.5	0.770316	0.445985	1	L	24	GH21	SCA6	L-24-GH21-SCA6
L24	37.6543	26.9363	10.9432	4.96904	2.20227	0.652154	0.344829	1	L	24	GH21	SCA6	L-24-GH21-SCA6
L24	104.938	44.6024	18.0876	7.85674	2.30217	0.662869	0.831778	1	L	24	GH21	SCA6	L-24-GH21-SCA6
L24	76.5432	36.634	14.0546	8.08901	1.73749	0.716719	1.1038	1	L	24	GH21	SCA6	L-24-GH21-SCA6
L24	40.7407	28.5076	11.967	4.96904	2.40832	0.629966	1.01536	1	L	24	GH21	SCA6	L-24-GH21-SCA6
L24	98.7654	40.1579	15.476	9.49334	1.6302	0.769613	1.89657	1	L	24	GH21	SCA6	L-24-GH21-SCA6
L24	214.197	61.8872	23.9341	11.967	2	0.702785	4.59971	1	L	24	GH21	SCA6	L-24-GH21-SCA6
L24	41.358	25.6345	9.49334	5.98352	1.58658	0.790896	1.00622	1	L	24	GH21	SCA6	L-24-GH21-SCA6
L24	214.815	57.1732	21.2277	13.3795	1.58658	0.825828	5.83265	1	L	24	GH21	SCA6	L-24-GH21-SCA6
L24	161.728	49.4281	18.0876	14.9485	1.20999	0.831857	2.09382	1	L	24	GH21	SCA6	L-24-GH21-SCA6
L24	125.309	43.031	15.9087	10.9432	1.45375	0.850408	1.83477	1	L	24	GH21	SCA6	L-24-GH21-SCA6
L24	54.321	30.3486	10.5409	7.02728	1.5	0.741142	0.9429	1	L	24	GH21	SCA6	L-24-GH21-SCA6
L24	53.0864	32.5708	13.4256	4.96904	2.70185	0.628835	1.7972	1	L	24	GH21	SCA6	L-24-GH21-SCA6
L24	64.1975	35.7135	14.9071	5.98352	2.49136	0.632505	0.974626	1	L	24	GH21	SCA6	L-24-GH21-SCA6
L24	159.877	55.0626	20.7573	11.6003	1.78937	0.662645	2.34541	1	L	24	GH21	SCA6	L-24-GH21-SCA6
L24	82.0987	37.6661	14.8241	6.75862	2.19336	0.727185	3.56619	1	L	24	GH21	SCA6	L-24-GH21-SCA6
L24	99.3827	39.507	15.1127	9.55814	1.58114	0.80015	1.78123	1	L	24	GH21	SCA6	L-24-GH21-SCA6
L24	66.0494	38.2053	15.9087	4.96904	3.20156	0.568632	5.44095	1	L	24	GH21	SCA6	L-24-GH21-SCA6
L24	51.8518	31.6503	12.4226	5.66558	2.19265	0.650456	1.66218	1	L	24	GH21	SCA6	L-24-GH21-SCA6
L24	30.8642	23.1427	8.95806	4.96904	1.80278	0.724164	2.32933	1	L	24	GH21	SCA6	L-24-GH21-SCA6
L24	43.8272	27.4755	10.4822	5.55556	1.8868	0.729563	0.741586	1	L	24	GH21	SCA6	L-24-GH21-SCA6
L48	66.0494	36.3644	14.9485	7.11458	2.1011	0.627663	0.172414	1	L	48	GH21	SCA6	L-48-GH21-SCA6
L48	109.259	39.507	14.2292	10.2439	1.38903	0.879668	1.95135	1	L	48	GH21	SCA6	L-48-GH21-SCA6
L48	125.309	45.2532	16.178	10.5409	1.53478	0.768938	0.84488	1	L	48	GH21	SCA6	L-48-GH21-SCA6
L48	180.864	55.6018	22.2222	11.1111	2	0.735165	0.315415	1	L	48	GH21	SCA6	L-48-GH21-SCA6
L48	46.9136	29.4281	12.0185	5.55556	2.16333	0.680745	1.05718	1	L	48	GH21	SCA6	L-48-GH21-SCA6
L48	189.506	60.0463	23.4389	12.2726	1.90985	0.660483	4.9152	1	L	48	GH21	SCA6	L-48-GH21-SCA6
L48	247.531	64.1094	24.5955	15.1127	1.62747	0.756825	2.30629	1	L	48	GH21	SCA6	L-48-GH21-SCA6
L48	98.1481	42.6497	16.9604	8.01234	2.11678	0.678046	0.983073	1	L	48	GH21	SCA6	L-48-GH21-SCA6
L48	138.889	49.3164	20.6679	10.4822	1.97171	0.71762	0.435722	1	L	48	GH21	SCA6	L-48-GH21-SCA6
L48	199.383	56.5223	20.6679	13.5628	1.52386	0.784256	3.40757	1	L	48	GH21	SCA6	L-48-GH21-SCA6
L48	123.457	42.3801	14.4871	11.4396	1.2664	0.863773	1.96128	1	L	48	GH21	SCA6	L-48-GH21-SCA6
L48	164.815	52.4591	19.4047	12.4226	1.56205	0.7526	2.06663	1	L	48	GH21	SCA6	L-48-GH21-SCA6
L48	247.531	66.1737	24.6707	15.1127	1.63244	0.710343	2.6109	1	L	48	GH21	SCA6	L-48-GH21-SCA6
L48	140.741	46.8246	16.8142	10.0615	1.67113	0.806644	5.66168	1	L	48	GH21	SCA6	L-48-GH21-SCA6
L48	90.1234	38.8562	14.9485	8.67805	1.72256	0.750114	0.516029	1	L	48	GH21	SCA6	L-48-GH21-SCA6
L48	238.889	60.0463	20.9644	15.436	1.35815	0.832595	2.17978	1	L	48	GH21	SCA6	L-48-GH21-SCA6
L48	103.086	38.5866	13.9222	11.4396	1.21702	0.870039	1.00345	1	L	48	GH21	SCA6	L-48-GH21-SCA6
L48	73.4568	35.4439	12.9577	8.95806	1.44648	0.734783	2.14203	1	L	48	GH21	SCA6	L-48-GH21-SCA6
L48	108.025	40.4275	13.0052	11.967	1.08675	0.830574	2.12566	1	L	48	GH21	SCA6	L-48-GH21-SCA6
L48	160.494	50.8878	19.6576	10.9994	1.78714	0.778828	1.27629	1	L	48	GH21	SCA6	L-48-GH21-SCA6
L48	108.025	43.5702	16.0247	8.01234	2	0.715078	6.2071	1	L	48	GH21	SCA6	L-48-GH21-SCA6
L48	158.025	49.586	16.9967	13.5172	1.25741	0.807637	1.87917	1	L	48	GH21	SCA6	L-48-GH21-SCA6
L48	41.9753	26.2854	10.4822	6.47884	1.61791	0.76344	0.507569	1	L	48	GH21	SCA6	L-48-GH21-SCA6
L48	116.049	45.1416	17.2848	9.42809	1.83333	0.715648	2.08434	1	L	48	GH21	SCA6	L-48-GH21-SCA6
L48	124.074	45.7924	18.4926	8.95806	2.06435	0.743538	1.76012	1	L	48	GH21	SCA6	L-48-GH21-SCA6
L48	60.4938	30.3486	12.0185	7.11458	1.68928	0.825362	0.639077	1	L	48	GH21	SCA6	L-48-GH21-SCA6
L48	126.543	47.0942	18.9867	9.49334	2	0.716991	1.35116	1	L	48	GH21	SCA6	L-48-GH21-SCA6
L48	182.716	52.1895	17.9505	14.4444	1.24273	0.842985	1.37895	1	L	48	GH21	SCA6	L-48-GH21-SCA6
L48	96.2963	40.1579	15.436	8.95806	1.72315	0.750372	1.91037	1	L	48	GH21	SCA6	L-48-GH21-SCA6
L48	161.728	50.8878	18.6256	11.6003	1.60561	0.784819	1.80923	1	L	48	GH21	SCA6	L-48-GH21-SCA6
L48	85.1852	37.0152	13.5172	7.85674	1.72046	0.781291	3.24425	1	L	48	GH21	SCA6	L-48-GH21-SCA6
L48	88.2716	37.6661	13.9222	8.95806	1.55415	0.781861	1.33728	1	L	48	GH21	SCA6	L-48-GH21-SCA6
L48	110.494	43.9515	17.5682	8.08901	2.17186	0.718787	2.67082	1	L	48	GH21	SCA6	L-48-GH21-SCA6
L48	40.7407	24.9836	9.49334	5.98352	1.58658	0.820214	0.111111	1	L	48	GH21	SCA6	L-48-GH21-SCA6
L48	149.383	47.7451	17.2491	11.6003	1.48695	0.82348	1.11144	1	L	48	GH21	SCA6	L-48-GH21-SCA6
L48	107.407	39.6187	13.5628	12.0185	1.1285	0.85989	0.943859	1	L	48	GH21	SCA6	L-48-GH21-SCA6
L48	119.136	43.5702	15.9087	10.2439	1.55299	0.788629	0.959928	1	L	48	GH21	SCA6	L-48-GH21-SCA6
L48	116.667	42.4918	15.1127	12.0185	1.25746	0.811981	0.542663	1	L	48	GH21	SCA6	L-48-GH21-SCA6
L48	98.1481	39.3491	14.2292	11.1111	1.28062	0.796566	1.74533	1	L	48	GH21	SCA6	L-48-GH21-SCA6
L48	288.272	63.5702	21.4591	17.9505	1.19546	0.896405	2.69766	1	L	48	GH21	SCA6	L-48-GH21-SCA6
L48	158.025	46.8246	16.0247	13.5628	1.18151	0.905705	2.01945	1	L	48	GH21	SCA6	L-48-GH21-SCA6
L48	241.358	62.2685	23.1207	16.0247	1.44282	0.782231	1.00036	1	L	48	GH21	SCA6	L-48-GH21-SCA6
L48	169.753	57.824	20.6679	11.1111	1.86011	0.637985	4.74387	1	L	48	GH21	SCA6	L-48-GH21-SCA6
L48	217.284	57.1732	19.4047	15.9087	1.21976	0.83532	3.52078	1	L	48	GH21	SCA6	L-48-GH21-SCA6
L48	116.667	43.031	15.9087	9.93808	1.60078	0.79176	3.10021	1	L	48	GH21	SCA6	L-48-GH21-SCA6
L48	175.309	55.7135	18.9215	14.2292	1.32977	0.709729	2.08124	1	L	48	GH21	SCA6	L-48-GH21-SCA6
L48	231.481	57.824	18.8889	17.3916	1.08609	0.86998	1.79849	1	L	48	GH21	SCA6	L-48-GH21-SCA6
L48	177.16	51.9199	19.1163	13.5628	1.40946	0.825865	1.38508	1	L	48	GH21	SCA6	L-48-GH21-SCA6
L48	256.79	61.6176	20.4275	16.9239	1.20702	0.849921	0.931412	1	L	48	GH21	SCA6	L-48-GH21-SCA6
L48	205.556	56.9036	20.7573	13.7437	1.51031	0.797738	1.2379	1	L	48	GH21	SCA6	L-48-GH21-SCA6
L48	127.16	42.7614	14.4871	12.9577	1.11803	0.873892	0.958878	1	L	48	GH21	SCA6	L-48-GH21-SCA6
L48	308.642	67.3638	23.9341	17.9505	1.33333	0.854696	2.71872	1	L	48	GH21	SCA6	L-48-GH21-SCA6
L48	262.346	64.872	26.2232	15.1127	1.73517	0.783375	0.808093	1	L	48	GH21	SCA6	L-48-GH21-SCA6
L48	190.123	53.4913	20.6679	13.5628	1.52386	0.834987	0.249366	1	L	48	GH21	SCA6	L-48-GH21-SCA6
L0	69.1358	36.634	14.9485	7.11458	2.1011	0.647359	2.89703	2	L	0	GH21	SCA6	L-0-GH21-SCA6
L0	48.1481	30.3486	12.0185	5.55556	2.16333	0.656921	2.06963	2	L	0	GH21	SCA6	L-0-GH21-SCA6
L0	79.6296	34.1421	12.0185	9.55814	1.25741	0.858427	0.495204	2	L	0	GH21	SCA6	L-0-GH21-SCA6
L0	54.9383	33.2217	12.6686	7.02728	1.80278	0.625521	2.31502	2	L	0	GH21	SCA6	L-0-GH21-SCA6
L0	66.0494	34.5234	14.0546	5.98352	2.34888	0.696388	2.83047	2	L	0	GH21	SCA6	L-0-GH21-SCA6
L0	86.4197	42.9193	18.2236	6.47884	2.81279	0.589544	3.32632	2	L	0	GH21	SCA6	L-0-GH21-SCA6
L0	40.7407	30.7298	12.4226	4.58123	2.71163	0.542148	0.972203	2	L	0	GH21	SCA6	L-0-GH21-SCA6
L0	80.8642	37.2848	14.0546	9.16246	1.53393	0.730974	1.55724	2	L	0	GH21	SCA6	L-0-GH21-SCA6
L0	59.8765	31.9199	12.6686	7.02728	1.80278	0.738488	1.47705	2	L	0	GH21	SCA6	L-0-GH21-SCA6
L0	114.815	46.8246	16.9967	9.16246	1.85504	0.658051	2.07209	2	L	0	GH21	SCA6	L-0-GH21-SCA6
L0	47.5309	28.7772	11.1111	6.47884	1.71499	0.721254	1.44402	2	L	0	GH21	SCA6	L-0-GH21-SCA6
L0	59.8765	33.7609	12.9577	6.47884	2	0.660145	4.22563	2	L	0	GH21	SCA6	L-0-GH21-SCA6
L0	57.4074	30.9994	11.967	7.02728	1.70294	0.750706	0.813437	2	L	0	GH21	SCA6	L-0-GH21-SCA6
L0	60.4938	31.6503	12.4226	6.47884	1.91741	0.758866	1.86669	2	L	0	GH21	SCA6	L-0-GH21-SCA6
L0	84.5679	36.3644	12.9577	8.95806	1.44648	0.803644	1.98039	2	L	0	GH21	SCA6	L-0-GH21-SCA6
L0	93.2099	38.5866	14.2292	8.67805	1.63967	0.786682	1.4403	2	L	0	GH21	SCA6	L-0-GH21-SCA6
L0	46.9136	27.2059	10.2439	5.66558	1.8081	0.796495	1.11016	2	L	0	GH21	SCA6	L-0-GH21-SCA6
L0	41.358	25.6345	8.67805	7.11458	1.21976	0.790896	1.55176	2	L	0	GH21	SCA6	L-0-GH21-SCA6
L0	55.5555	31.6503	12.9577	5.55556	2.33238	0.696917	2.94919	2	L	0	GH21	SCA6	L-0-GH21-SCA6
L0	95.679	38.5866	13.9222	8.95806	1.55415	0.807521	2.65375	2	L	0	GH21	SCA6	L-0-GH21-SCA6
L0	22.8395	20.2696	8.08901	3.51364	2.30217	0.698564	3.05516	2	L	0	GH21	SCA6	L-0-GH21-SCA6
L0	33.9506	22.4918	8.01234	6.47884	1.23669	0.843351	0.5739	2	L	0	GH21	SCA6	L-0-GH21-SCA6
L0	48.7654	26.555	9.55814	7.11458	1.34346	0.869019	0.401743	2	L	0	GH21	SCA6	L-0-GH21-SCA6
L0	72.2222	36.3644	14.4871	6.47884	2.23607	0.686324	3.24454	2	L	0	GH21	SCA6	L-0-GH21-SCA6
L0	40.7407	27.2059	10.9432	4.96904	2.20227	0.691693	1.51515	2	L	0	GH21	SCA6	L-0-GH21-SCA6
L0	48.1481	29.4281	11.4396	5.98352	1.91185	0.698659	0.457381	2	L	0	GH21	SCA6	L-0-GH21-SCA6
L0	36.4197	25.6345	10.4822	4.96904	2.1095	0.696461	0.436307	2	L	0	GH21	SCA6	L-0-GH21-SCA6
L0	44.4444	27.2059	10.5409	5.98352	1.76166	0.754575	2.87739	2	L	0	GH21	SCA6	L-0-GH21-SCA6
L0	51.8518	31.269	12.6686	5.55556	2.28035	0.666415	2.75977	2	L	0	GH21	SCA6	L-0-GH21-SCA6
L0	41.358	25.6345	10.2439	6.28539	1.6298	0.790896	1.26504	2	L	0	GH21	SCA6	L-0-GH21-SCA6
L0	96.9136	39.507	13.7437	10.2439	1.34164	0.780271	2.10822	2	L	0	GH21	SCA6	L-0-GH21-SCA6
L0	41.9753	28.5076	11.6003	4.58123	2.53215	0.649056	3.44532	2	L	0	GH21	SCA6	L-0-GH21-SCA6
L0	93.8271	41.8409	16.4054	8.95806	1.83135	0.673497	3.34679	2	L	0	GH21	SCA6	L-0-GH21-SCA6
L0	74.0741	33.8725	12.9577	8.95806	1.44648	0.811299	1.8338	2	L	0	GH21	SCA6	L-0-GH21-SCA6
L0	45.0617	26.555	10.2439	6.28539	1.6298	0.803018	1.24333	2	L	0	GH21	SCA6	L-0-GH21-SCA6
L0	61.1111	33.2217	12.6686	7.02728	1.80278	0.695805	1.56575	2	L	0	GH21	SCA6	L-0-GH21-SCA6
L0	51.8518	30.7298	11.967	5.98352	2	0.690007	1.57711	2	L	0	GH21	SCA6	L-0-GH21-SCA6
L0	73.4568	34.1421	13.4256	7.45356	1.80123	0.791882	2.78197	2	L	0	GH21	SCA6	L-0-GH21-SCA6
L0	53.0864	28.5076	9.55814	8.01234	1.19293	0.820865	1.75124	2	L	0	GH21	SCA6	L-0-GH21-SCA6
L0	30.2469	23.4123	9.55814	4.71404	2.02759	0.69343	0.762511	2	L	0	GH21	SCA6	L-0-GH21-SCA6
L0	64.1975	31.6503	11.967	7.02728	1.70294	0.805327	1.0408	2	L	0	GH21	SCA6	L-0-GH21-SCA6
L0	30.2469	22.4918	8.46197	4.96904	1.70294	0.751349	0.891378	2	L	0	GH21	SCA6	L-0-GH21-SCA6
L0	53.0864	30.7298	11.6003	5.98352	1.93872	0.706436	3.20087	2	L	0	GH21	SCA6	L-0-GH21-SCA6
L0	55.5555	31.6503	12.6686	5.66558	2.23607	0.696917	1.82036	2	L	0	GH21	SCA6	L-0-GH21-SCA6
L0	64.1975	33.4913	12.9577	8.01234	1.61722	0.719226	2.01506	2	L	0	GH21	SCA6	L-0-GH21-SCA6
L0	45.0617	28.7772	12.0185	5.55556	2.16333	0.683786	0.863685	2	L	0	GH21	SCA6	L-0-GH21-SCA6
L24	70.3704	34.793	12.9577	7.45356	1.73845	0.730492	3.67523	2	L	24	GH21	SCA6	L-24-GH21-SCA6
L24	78.395	35.4439	13.0052	8.46197	1.5369	0.78418	0.078493	2	L	24	GH21	SCA6	L-24-GH21-SCA6
L24	70.3704	33.4913	13.5628	7.11458	1.90634	0.788382	0.299145	2	L	24	GH21	SCA6	L-24-GH21-SCA6
L24	83.9506	35.7135	12.9577	8.95806	1.44648	0.827122	1.32248	2	L	24	GH21	SCA6	L-24-GH21-SCA6
L24	62.3457	30.9994	11.1111	8.01234	1.38675	0.815283	0.188562	2	L	24	GH21	SCA6	L-24-GH21-SCA6
L24	59.8765	30.9994	10.9432	7.45356	1.46818	0.782995	2.65527	2	L	24	GH21	SCA6	L-24-GH21-SCA6
L24	53.0864	37.0152	15.476	4.96904	3.11448	0.486892	2.83824	2	L	24	GH21	SCA6	L-24-GH21-SCA6
L24	22.2222	19.6187	7.11458	5.55556	1.28062	0.725531	1.73611	2	L	24	GH21	SCA6	L-24-GH21-SCA6
L24	76.5432	37.9357	15.1127	7.02728	2.15058	0.668375	2.92473	2	L	24	GH21	SCA6	L-24-GH21-SCA6
L24	48.1481	27.2059	10.2439	7.11458	1.43985	0.817456	0.646081	2	L	24	GH21	SCA6	L-24-GH21-SCA6
L24	62.3457	33.2217	12.4226	6.75862	1.83804	0.709861	1.69879	2	L	24	GH21	SCA6	L-24-GH21-SCA6
L24	75.3086	36.634	13.5628	8.01234	1.69274	0.705159	2.1987	2	L	24	GH21	SCA6	L-24-GH21-SCA6
L24	53.7037	33.6029	14.0546	4.58123	3.06786	0.597668	2.9003	2	L	24	GH21	SCA6	L-24-GH21-SCA6
L24	57.4074	33.7609	14.9485	4.71404	3.17105	0.632923	3.55416	2	L	24	GH21	SCA6	L-24-GH21-SCA6
L24	38.2716	27.2059	10.9994	6.28539	1.75	0.649773	0.536876	2	L	24	GH21	SCA6	L-24-GH21-SCA6
L24	46.2963	28.7772	11.967	4.96904	2.40832	0.70252	1.96563	2	L	24	GH21	SCA6	L-24-GH21-SCA6
L24	68.5185	32.8404	13.0052	7.02728	1.85068	0.798365	1.4813	2	L	24	GH21	SCA6	L-24-GH21-SCA6
L24	32.716	27.4755	12.0185	4.00617	3	0.544604	1.71918	2	L	24	GH21	SCA6	L-24-GH21-SCA6
L24	78.395	35.4439	12.6686	9.55814	1.32543	0.78418	1.05748	2	L	24	GH21	SCA6	L-24-GH21-SCA6
L24	24.0741	21.5713	8.01234	4.00617	2	0.650137	2.14414	2	L	24	GH21	SCA6	L-24-GH21-SCA6
L24	38.2716	29.4281	12.4226	4.58123	2.71163	0.555344	0.092593	2	L	24	GH21	SCA6	L-24-GH21-SCA6
L24	34.5679	26.2854	10.5409	4.58123	2.3009	0.628715	1.00774	2	L	24	GH21	SCA6	L-24-GH21-SCA6
L24	62.3457	35.0626	14.4444	5.98352	2.41404	0.637276	1.60428	2	L	24	GH21	SCA6	L-24-GH21-SCA6
L24	70.9876	35.0626	13.0052	7.02728	1.85068	0.725612	3.36635	2	L	24	GH21	SCA6	L-24-GH21-SCA6
L24	48.1481	30.7298	13.0052	4.58123	2.83881	0.640721	3.26616	2	L	24	GH21	SCA6	L-24-GH21-SCA6
L24	59.8765	35.4439	14.4444	5.98352	2.41404	0.598941	2.26253	2	L	24	GH21	SCA6	L-24-GH21-SCA6
L24	98.7654	38.317	13.5628	11.1111	1.22066	0.845342	1.21393	2	L	24	GH21	SCA6	L-24-GH21-SCA6
L24	66.6667	37.0152	15.1127	5.98352	2.52573	0.611445	3.90108	2	L	24	GH21	SCA6	L-24-GH21-SCA6
L24	35.1852	25.6345	10.5409	4.58123	2.3009	0.672852	0.434653	2	L	24	GH21	SCA6	L-24-GH21-SCA6
L24	77.1605	39.507	15.476	7.02728	2.20227	0.621234	3.48601	2	L	24	GH21	SCA6	L-24-GH21-SCA6
L24	64.8148	33.2217	13.0052	7.02728	1.85068	0.737975	2.52928	2	L	24	GH21	SCA6	L-24-GH21-SCA6
L24	60.4938	32.5708	13.0052	5.98352	2.17351	0.71658	2.74566	2	L	24	GH21	SCA6	L-24-GH21-SCA6
L24	32.0988	21.8409	7.11458	7.11458	1	0.845581	0.710318	2	L	24	GH21	SCA6	L-24-GH21-SCA6
L24	43.8272	27.8567	10.9432	5.98352	1.82889	0.709729	1.77565	2	L	24	GH21	SCA6	L-24-GH21-SCA6
L24	83.3333	38.2053	15.1127	9.16246	1.64942	0.717433	0.907629	2	L	24	GH21	SCA6	L-24-GH21-SCA6
L24	49.3827	29.4281	11.6003	5.98352	1.93872	0.716573	2.38393	2	L	24	GH21	SCA6	L-24-GH21-SCA6
L24	75.9259	34.1421	12.4226	9.93808	1.25	0.8185	0.808095	2	L	24	GH21	SCA6	L-24-GH21-SCA6
L24	54.9383	30.9994	11.967	5.98352	2	0.718418	1.47269	2	L	24	GH21	SCA6	L-24-GH21-SCA6
L24	33.9506	22.1105	7.45356	6.47884	1.15045	0.872687	0.618054	2	L	24	GH21	SCA6	L-24-GH21-SCA6
L48	59.2592	38.317	15.9087	4.58123	3.47258	0.507205	4.61756	2	L	48	GH21	SCA6	L-48-GH21-SCA6
L48	111.111	45.1416	18.2236	8.67805	2.09996	0.685195	0.065359	2	L	48	GH21	SCA6	L-48-GH21-SCA6
L48	48.7654	27.8567	10.5409	5.98352	1.76166	0.789698	0.331057	2	L	48	GH21	SCA6	L-48-GH21-SCA6
L48	53.7037	30.079	12.0185	7.11458	1.68928	0.745913	0.226161	2	L	48	GH21	SCA6	L-48-GH21-SCA6
L48	69.1358	40.5392	16.9967	4.58123	3.71008	0.528643	6.5742	2	L	48	GH21	SCA6	L-48-GH21-SCA6
L48	83.3333	38.5866	15.476	7.02728	2.20227	0.703325	3.76295	2	L	48	GH21	SCA6	L-48-GH21-SCA6
L48	113.58	53.11	22.4983	6.47884	3.47258	0.506011	3.57998	2	L	48	GH21	SCA6	L-48-GH21-SCA6
L48	42.5926	27.8567	10.9432	5.98352	1.82889	0.689737	1.5374	2	L	48	GH21	SCA6	L-48-GH21-SCA6
L48	79.0123	35.7135	13.5628	8.01234	1.69274	0.778467	0.221502	2	L	48	GH21	SCA6	L-48-GH21-SCA6
L48	58.0247	30.3486	12.0185	6.47884	1.85504	0.791674	1.96643	2	L	48	GH21	SCA6	L-48-GH21-SCA6
L48	61.1111	31.9199	12.6686	7.11458	1.78066	0.753714	0.573237	2	L	48	GH21	SCA6	L-48-GH21-SCA6
L48	86.4197	38.8562	14.4871	8.01234	1.8081	0.719288	0.618139	2	L	48	GH21	SCA6	L-48-GH21-SCA6
L48	59.2592	36.0948	15.1127	5.98352	2.52573	0.571581	1.69637	2	L	48	GH21	SCA6	L-48-GH21-SCA6
L48	76.5432	38.8562	16.0247	6.47884	2.47339	0.637083	2.90349	2	L	48	GH21	SCA6	L-48-GH21-SCA6
L48	87.6543	37.9357	13.9222	8.95806	1.55415	0.765397	2.41579	2	L	48	GH21	SCA6	L-48-GH21-SCA6
L48	77.1605	35.0626	13.0052	9.49334	1.36993	0.788708	1.12894	2	L	48	GH21	SCA6	L-48-GH21-SCA6
L48	101.852	39.507	14.0546	9.49334	1.48047	0.82003	1.98048	2	L	48	GH21	SCA6	L-48-GH21-SCA6
L48	80.8642	36.3644	13.4256	8.46197	1.58658	0.768448	3.34077	2	L	48	GH21	SCA6	L-48-GH21-SCA6
L48	85.8025	38.5866	14.4444	9.49334	1.52154	0.724164	1.36047	2	L	48	GH21	SCA6	L-48-GH21-SCA6
L48	87.6543	36.634	13.5628	8.01234	1.69274	0.820759	2.12549	2	L	48	GH21	SCA6	L-48-GH21-SCA6
L48	87.037	42.1105	16.9239	7.45356	2.27059	0.616783	0.647494	2	L	48	GH21	SCA6	L-48-GH21-SCA6
L48	71.6049	32.5708	10.9432	9.49334	1.15272	0.848196	0.13514	2	L	48	GH21	SCA6	L-48-GH21-SCA6
L48	93.2099	39.507	15.7135	8.67805	1.81072	0.750451	1.79291	2	L	48	GH21	SCA6	L-48-GH21-SCA6
L48	48.1481	29.4281	11.967	5.98352	2	0.698659	1.83855	2	L	48	GH21	SCA6	L-48-GH21-SCA6
L48	62.9629	30.3486	11.1111	8.01234	1.38675	0.859051	1.49787	2	L	48	GH21	SCA6	L-48-GH21-SCA6
L48	48.1481	28.5076	10.9432	5.98352	1.82889	0.744505	0.558674	2	L	48	GH21	SCA6	L-48-GH21-SCA6
L48	79.6296	40.8088	16.6667	8.01234	2.08013	0.600865	1.70318	2	L	48	GH21	SCA6	L-48-GH21-SCA6
L48	56.7901	32.9521	12.4226	5.66558	2.19265	0.65723	2.17272	2	L	48	GH21	SCA6	L-48-GH21-SCA6
L48	69.7531	40.4275	16.6667	6.47884	2.57248	0.536314	0.536874	2	L	48	GH21	SCA6	L-48-GH21-SCA6
L0	108.025	43.031	16.178	9.16246	1.76569	0.733111	0.255945	3	L	0	GH21	SCA6	L-0-GH21-SCA6
L0	109.259	40.4275	15.1127	10.5409	1.43372	0.840067	1.00095	3	L	0	GH21	SCA6	L-0-GH21-SCA6
L0	96.9136	43.9515	18.6256	8.08901	2.30258	0.630445	0.985745	3	L	0	GH21	SCA6	L-0-GH21-SCA6
L0	101.235	40.1579	15.476	9.49334	1.6302	0.788853	1.00032	3	L	0	GH21	SCA6	L-0-GH21-SCA6
L0	106.79	41.7293	15.9087	8.46197	1.88002	0.770654	2.20224	3	L	0	GH21	SCA6	L-0-GH21-SCA6
L0	131.481	46.1737	17.9505	10.9432	1.64034	0.77497	0.824939	3	L	0	GH21	SCA6	L-0-GH21-SCA6
L0	101.235	44.6024	18.8889	8.46197	2.23221	0.639474	2.46427	3	L	0	GH21	SCA6	L-0-GH21-SCA6
L0	109.877	46.4433	18.4926	8.95806	2.06435	0.64013	1.2194	3	L	0	GH21	SCA6	L-0-GH21-SCA6
L0	166.049	54.6813	22.3331	10.0615	2.21965	0.697861	5.8784	3	L	0	GH21	SCA6	L-0-GH21-SCA6
L0	160.494	52.1895	20.9644	12.0185	1.74434	0.74046	1.13307	3	L	0	GH21	SCA6	L-0-GH21-SCA6
L0	125.926	45.5228	16.9967	10.2439	1.6592	0.7636	1.13615	3	L	0	GH21	SCA6	L-0-GH21-SCA6
L0	96.2963	42.3801	16.8142	7.85674	2.14009	0.673743	2.27106	3	L	0	GH21	SCA6	L-0-GH21-SCA6
L0	137.654	47.0942	17.2491	10.2439	1.68383	0.779947	1.83094	3	L	0	GH21	SCA6	L-0-GH21-SCA6
L0	114.198	45.2532	17.2491	9.16246	1.88258	0.700756	0.647708	3	L	0	GH21	SCA6	L-0-GH21-SCA6
L0	136.42	48.3959	18.8889	9.93808	1.90066	0.731929	2.43173	3	L	0	GH21	SCA6	L-0-GH21-SCA6
L0	112.346	50.5065	21.2277	7.85674	2.70185	0.553442	1.18735	3	L	0	GH21	SCA6	L-0-GH21-SCA6
L0	130.247	46.1737	17.2491	10.2439	1.68383	0.767693	2.12071	3	L	0	GH21	SCA6	L-0-GH21-SCA6
L0	135.802	47.7451	18.0876	11.8113	1.53138	0.748618	0.577845	3	L	0	GH21	SCA6	L-0-GH21-SCA6
L0	128.395	46.4433	18.4926	9.55814	1.93475	0.748017	1.37761	3	L	0	GH21	SCA6	L-0-GH21-SCA6
L0	105.556	47.4755	19.1807	7.85674	2.44131	0.588508	1.45814	3	L	0	GH21	SCA6	L-0-GH21-SCA6
L0	112.963	44.872	18.2236	8.67805	2.09996	0.705011	2.11239	3	L	0	GH21	SCA6	L-0-GH21-SCA6
L0	174.691	52.4591	19.6889	12.6686	1.55415	0.7977	1.26827	3	L	0	GH21	SCA6	L-0-GH21-SCA6
L0	86.4197	42.3801	17.9505	7.02728	2.55441	0.604641	0.301292	3	L	0	GH21	SCA6	L-0-GH21-SCA6
L0	165.432	53.11	20.4879	11.3312	1.8081	0.737017	2.64095	3	L	0	GH21	SCA6	L-0-GH21-SCA6
L0	140.741	46.8246	17.2491	10.2439	1.68383	0.806644	2.29405	3	L	0	GH21	SCA6	L-0-GH21-SCA6
L0	84.5679	37.2848	15.1127	8.01234	1.88619	0.764453	0.591993	3	L	0	GH21	SCA6	L-0-GH21-SCA6
L0	133.333	46.8246	17.5682	10.4822	1.676	0.764189	4.12232	3	L	0	GH21	SCA6	L-0-GH21-SCA6
L0	150.617	49.9673	20.0308	11.1111	1.80278	0.758077	1.53226	3	L	0	GH21	SCA6	L-0-GH21-SCA6
L0	132.099	46.8246	18.4926	10.4822	1.76419	0.757113	2.45707	3	L	0	GH21	SCA6	L-0-GH21-SCA6
L0	111.111	43.3006	16.9239	9.49334	1.78272	0.744696	0.702508	3	L	0	GH21	SCA6	L-0-GH21-SCA6
L0	129.63	48.6655	19.1163	9.55814	2	0.687814	3.85597	3	L	0	GH21	SCA6	L-0-GH21-SCA6
L0	142.593	49.6977	20.3973	10.4822	1.9459	0.725495	0.710718	3	L	0	GH21	SCA6	L-0-GH21-SCA6
L0	107.407	45.5228	17.9161	7.85674	2.28035	0.651306	4.59691	3	L	0	GH21	SCA6	L-0-GH21-SCA6
L0	113.58	42.3801	16.0247	10.4822	1.52875	0.794672	1.36865	3	L	0	GH21	SCA6	L-0-GH21-SCA6
L0	151.235	49.3164	18.3249	11.6003	1.57969	0.781408	0.397346	3	L	0	GH21	SCA6	L-0-GH21-SCA6
L0	129.63	47.7451	17.9505	10.5409	1.70294	0.71459	2.76495	3	L	0	GH21	SCA6	L-0-GH21-SCA6
L0	130.864	45.5228	17.3916	10.9432	1.58927	0.793546	1.37413	3	L	0	GH21	SCA6	L-0-GH21-SCA6
L0	108.642	44.6024	18.3922	8.95806	2.05314	0.686265	0.678693	3	L	0	GH21	SCA6	L-0-GH21-SCA6
L0	88.8889	40.1579	16.178	8.08901	2	0.692651	0.705832	3	L	0	GH21	SCA6	L-0-GH21-SCA6
L0	174.691	53.3796	20.1231	12.2726	1.63967	0.770426	1.06216	3	L	0	GH21	SCA6	L-0-GH21-SCA6
L0	129.012	48.0147	20.0308	10.5409	1.90029	0.703223	0.468648	3	L	0	GH21	SCA6	L-0-GH21-SCA6
L0	142.593	49.3164	19.4047	10.2439	1.89426	0.736756	0.866421	3	L	0	GH21	SCA6	L-0-GH21-SCA6
L0	107.407	41.0784	16.0247	9.55814	1.67655	0.799866	0.739944	3	L	0	GH21	SCA6	L-0-GH21-SCA6
L24	135.802	45.9041	16.9604	12.0185	1.41119	0.809868	1.12414	3	L	24	GH21	SCA6	L-24-GH21-SCA6
L24	78.395	41.1901	16.9967	5.66558	3	0.580649	5.9463	3	L	24	GH21	SCA6	L-24-GH21-SCA6
L24	94.4444	38.5866	13.7437	9.16246	1.5	0.797102	3.15035	3	L	24	GH21	SCA6	L-24-GH21-SCA6
L24	131.481	45.2532	15.9087	11.967	1.32938	0.806817	2.74033	3	L	24	GH21	SCA6	L-24-GH21-SCA6
L24	150.617	51.269	19.6889	10.5409	1.86786	0.720069	1.90019	3	L	24	GH21	SCA6	L-24-GH21-SCA6
L24	127.16	49.0468	20.3973	8.95806	2.27698	0.664264	0.441171	3	L	24	GH21	SCA6	L-24-GH21-SCA6
L24	91.9753	40.8088	16.9604	8.01234	2.11678	0.694022	0.37354	3	L	24	GH21	SCA6	L-24-GH21-SCA6
L24	109.877	45.5228	19.1163	8.67805	2.20283	0.666279	0.574944	3	L	24	GH21	SCA6	L-24-GH21-SCA6
L24	128.395	51.269	20.4275	8.46197	2.41404	0.61383	0.05291	3	L	24	GH21	SCA6	L-24-GH21-SCA6
L24	126.543	49.6977	20.1231	7.85674	2.56125	0.643838	4.72859	3	L	24	GH21	SCA6	L-24-GH21-SCA6
L24	135.802	49.4281	18.6256	9.49334	1.96197	0.698506	0.605908	3	L	24	GH21	SCA6	L-24-GH21-SCA6
L24	97.5308	41.4597	16.5179	8.46197	1.95201	0.713017	1.38547	3	L	24	GH21	SCA6	L-24-GH21-SCA6
L24	122.839	48.0147	19.7828	8.67805	2.27963	0.669576	2.20906	3	L	24	GH21	SCA6	L-24-GH21-SCA6
L24	88.2716	43.031	17.5682	7.02728	2.5	0.599056	3.72661	3	L	24	GH21	SCA6	L-24-GH21-SCA6
L24	140.741	48.6655	18.6256	9.49334	1.96197	0.746769	3.7267	3	L	24	GH21	SCA6	L-24-GH21-SCA6
L24	120.37	49.3164	20.2759	8.95806	2.26342	0.621937	3.07464	3	L	24	GH21	SCA6	L-24-GH21-SCA6
L24	95.679	43.031	16.9239	7.45356	2.27059	0.649327	0.824175	3	L	24	GH21	SCA6	L-24-GH21-SCA6
L24	112.963	45.2532	18.0876	7.85674	2.30217	0.693181	2.04107	3	L	24	GH21	SCA6	L-24-GH21-SCA6
L24	161.728	50.8878	19.7828	11.1111	1.78045	0.784819	2.17359	3	L	24	GH21	SCA6	L-24-GH21-SCA6
L24	151.235	50.2369	19.4365	9.93808	1.95576	0.753035	0.584566	3	L	24	GH21	SCA6	L-24-GH21-SCA6
L24	120.988	44.2211	15.7135	10.2439	1.53393	0.777485	0.919222	3	L	24	GH21	SCA6	L-24-GH21-SCA6
L24	183.951	55.3322	21.3726	11.3312	1.88619	0.755014	2.37823	3	L	24	GH21	SCA6	L-24-GH21-SCA6
L24	101.235	42.7614	16.178	8.08901	2	0.69572	2.17673	3	L	24	GH21	SCA6	L-24-GH21-SCA6
L24	122.839	43.9515	15.436	11.4396	1.34935	0.799099	0.966822	3	L	24	GH21	SCA6	L-24-GH21-SCA6
L24	98.7654	46.4433	20.3973	7.45356	2.73658	0.575398	1.78845	3	L	24	GH21	SCA6	L-24-GH21-SCA6
L24	87.037	40.8088	16.178	8.08901	2	0.656759	2.87889	3	L	24	GH21	SCA6	L-24-GH21-SCA6
L24	103.704	42.3801	16.178	8.08901	2	0.72557	3.98261	3	L	24	GH21	SCA6	L-24-GH21-SCA6
L24	130.864	50.8878	21.3726	8.95806	2.38586	0.635044	1.48224	3	L	24	GH21	SCA6	L-24-GH21-SCA6
L24	155.556	49.586	18.4926	11.4396	1.61654	0.795018	0.796051	3	L	24	GH21	SCA6	L-24-GH21-SCA6
L24	104.321	43.031	17.3916	8.46197	2.05527	0.707975	2.0839	3	L	24	GH21	SCA6	L-24-GH21-SCA6
L24	103.704	44.6024	18.3922	8.46197	2.17351	0.655071	1.30216	3	L	24	GH21	SCA6	L-24-GH21-SCA6
L24	123.457	50.5065	20.4879	7.11458	2.8797	0.608178	6.0311	3	L	24	GH21	SCA6	L-24-GH21-SCA6
L24	88.2716	43.031	17.2491	7.02728	2.45459	0.599056	2.30059	3	L	24	GH21	SCA6	L-24-GH21-SCA6
L24	133.333	49.0468	19.4047	9.16246	2.11785	0.696509	1.76378	3	L	24	GH21	SCA6	L-24-GH21-SCA6
L24	77.7778	38.8562	16.0247	6.47884	2.47339	0.647359	3.139	3	L	24	GH21	SCA6	L-24-GH21-SCA6
L24	111.111	46.8246	18.3922	8.46197	2.17351	0.636824	2.67632	3	L	24	GH21	SCA6	L-24-GH21-SCA6
L24	90.1234	40.1579	15.1127	8.08901	1.86831	0.702272	3.02619	3	L	24	GH21	SCA6	L-24-GH21-SCA6
L24	100	46.8246	18.8889	7.45356	2.53421	0.573141	2.40407	3	L	24	GH21	SCA6	L-24-GH21-SCA6
L24	137.037	49.9673	19.6889	9.16246	2.14887	0.689725	2.86652	3	L	24	GH21	SCA6	L-24-GH21-SCA6
L24	142.593	50.2369	20.0308	9.49334	2.10999	0.710005	0.280956	3	L	24	GH21	SCA6	L-24-GH21-SCA6
L48	205.556	58.2053	21.4591	14.4444	1.48563	0.762454	1.79554	3	L	48	GH21	SCA6	L-48-GH21-SCA6
L48	145.062	47.4755	17.5682	10.5409	1.66667	0.808768	3.03449	3	L	48	GH21	SCA6	L-48-GH21-SCA6
L48	107.407	41.4597	15.476	9.49334	1.6302	0.785222	2.65084	3	L	48	GH21	SCA6	L-48-GH21-SCA6
L48	116.667	49.3164	20.0308	7.02728	2.85044	0.602801	4.41541	3	L	48	GH21	SCA6	L-48-GH21-SCA6
L48	111.111	43.3006	17.9161	8.95806	2	0.744696	0.331812	3	L	48	GH21	SCA6	L-48-GH21-SCA6
L48	208.642	61.6176	25.3372	12.6686	2	0.690561	2.7664	3	L	48	GH21	SCA6	L-48-GH21-SCA6
L48	174.074	57.0152	22.4983	10.5409	2.13437	0.672918	1.37191	3	L	48	GH21	SCA6	L-48-GH21-SCA6
L48	180.864	55.9831	21.3726	10.0615	2.12419	0.725185	4.05162	3	L	48	GH21	SCA6	L-48-GH21-SCA6
L48	91.358	39.2375	15.1127	8.08901	1.86831	0.745684	1.69999	3	L	48	GH21	SCA6	L-48-GH21-SCA6
L48	164.815	52.8404	21.3726	11.4396	1.86831	0.741778	1.96924	3	L	48	GH21	SCA6	L-48-GH21-SCA6
L48	164.815	52.4591	20.3973	11.4396	1.78304	0.7526	1.07941	3	L	48	GH21	SCA6	L-48-GH21-SCA6
L48	162.346	54.6813	22.1387	10.5409	2.10026	0.682295	0.806867	3	L	48	GH21	SCA6	L-48-GH21-SCA6
L48	140.123	51.9199	21.4591	8.46197	2.53595	0.65321	2.90096	3	L	48	GH21	SCA6	L-48-GH21-SCA6
L48	182.716	58.8562	23.8566	10.9432	2.18004	0.66283	4.11515	3	L	48	GH21	SCA6	L-48-GH21-SCA6
L48	140.123	59.665	25.9391	7.85674	3.30152	0.494631	5.15274	3	L	48	GH21	SCA6	L-48-GH21-SCA6
L48	108.025	43.031	16.9967	7.85674	2.16333	0.733111	4.85202	3	L	48	GH21	SCA6	L-48-GH21-SCA6
L48	159.259	53.11	22.0549	10.2439	2.15297	0.709516	1.37618	3	L	48	GH21	SCA6	L-48-GH21-SCA6
L48	193.21	55.6018	20.8759	13.4256	1.55493	0.785346	0.717618	3	L	48	GH21	SCA6	L-48-GH21-SCA6
L48	208.025	55.9831	19.8762	14.9071	1.33333	0.834087	0.267078	3	L	48	GH21	SCA6	L-48-GH21-SCA6
L48	144.444	49.9673	19.6576	11.8113	1.6643	0.727008	1.16046	3	L	48	GH21	SCA6	L-48-GH21-SCA6
L48	191.358	53.11	18.9867	14.4444	1.31446	0.852519	2.21742	3	L	48	GH21	SCA6	L-48-GH21-SCA6
L48	217.901	68.5539	28.3932	10.4822	2.7087	0.582647	3.76467	3	L	48	GH21	SCA6	L-48-GH21-SCA6
L48	203.086	62.6497	24.5955	10.5409	2.33333	0.650208	2.04284	3	L	48	GH21	SCA6	L-48-GH21-SCA6
L48	172.222	52.8404	19.4047	11.3312	1.71251	0.775117	3.04872	3	L	48	GH21	SCA6	L-48-GH21-SCA6
L48	109.877	42.3801	16.0247	9.55814	1.67655	0.768758	2.54128	3	L	48	GH21	SCA6	L-48-GH21-SCA6
L48	193.21	59.1258	24.037	10.4822	2.29313	0.694521	1.50189	3	L	48	GH21	SCA6	L-48-GH21-SCA6
L48	232.716	64.1094	24.8452	13.4256	1.85058	0.711529	2.49248	3	L	48	GH21	SCA6	L-48-GH21-SCA6
L48	244.444	70.5065	28.48	11.967	2.37987	0.617919	1.2624	3	L	48	GH21	SCA6	L-48-GH21-SCA6
L48	160.494	51.8082	19.1163	10.4822	1.82369	0.751399	4.52939	3	L	48	GH21	SCA6	L-48-GH21-SCA6
L48	165.432	54.4117	22.1387	10.5409	2.10026	0.702174	0.810828	3	L	48	GH21	SCA6	L-48-GH21-SCA6
L48	111.111	44.6024	16.8142	8.95806	1.87699	0.701862	2.31232	3	L	48	GH21	SCA6	L-48-GH21-SCA6
L48	195.062	61.0784	24.6707	10.0615	2.45198	0.657062	5.62045	3	L	48	GH21	SCA6	L-48-GH21-SCA6
L48	230.864	63.8398	23.9341	11.967	2	0.711841	1.45398	3	L	48	GH21	SCA6	L-48-GH21-SCA6
L48	227.16	66.4433	24.5955	11.6003	2.12024	0.646606	4.09666	3	L	48	GH21	SCA6	L-48-GH21-SCA6
L48	215.432	63.1889	24.5955	11.6003	2.12024	0.678013	1.4767	3	L	48	GH21	SCA6	L-48-GH21-SCA6
D0	177.778	52.1895	20.0308	12.0185	1.66667	0.820202	1.77576	1	D	0	GH21	SCA6	D-0-GH21-SCA6
D0	225.309	66.7129	28.1091	11.6003	2.42313	0.636162	2.01034	1	D	0	GH21	SCA6	D-0-GH21-SCA6
D0	185.185	61.2363	24.6707	11.1111	2.22036	0.62058	1.47206	1	D	0	GH21	SCA6	D-0-GH21-SCA6
D0	169.753	52.4591	20.3973	12.4226	1.64195	0.77515	3.01934	1	D	0	GH21	SCA6	D-0-GH21-SCA6
D0	175.309	55.3322	21.9145	12.0185	1.8234	0.719544	1.32452	1	D	0	GH21	SCA6	D-0-GH21-SCA6
D0	174.074	58.4749	20.7573	12.6686	1.63848	0.639742	2.81804	1	D	0	GH21	SCA6	D-0-GH21-SCA6
D0	149.383	54.0305	21.8863	8.46197	2.58644	0.643032	4.72031	1	D	0	GH21	SCA6	D-0-GH21-SCA6
D0	209.259	57.824	22.3607	13.9222	1.60612	0.786462	0.816579	1	D	0	GH21	SCA6	D-0-GH21-SCA6
D0	86.4197	38.4749	14.9071	8.46197	1.76166	0.733614	0.536155	1	D	0	GH21	SCA6	D-0-GH21-SCA6
D0	120.37	48.5539	19.4047	7.45356	2.60342	0.641626	5.10151	1	D	0	GH21	SCA6	D-0-GH21-SCA6
D0	187.037	64.4907	23.7788	11.6003	2.04984	0.565123	4.12727	1	D	0	GH21	SCA6	D-0-GH21-SCA6
D0	189.506	54.6813	20.2759	12.4226	1.63218	0.796444	0.926376	1	D	0	GH21	SCA6	D-0-GH21-SCA6
D0	131.481	46.1737	17.3561	11.1111	1.56205	0.77497	1.13776	1	D	0	GH21	SCA6	D-0-GH21-SCA6
D0	156.173	51.6966	19.4047	12.4226	1.56205	0.734331	3.56662	1	D	0	GH21	SCA6	D-0-GH21-SCA6
D0	298.148	70.7761	27.7778	15.1127	1.83804	0.747944	0.959131	1	D	0	GH21	SCA6	D-0-GH21-SCA6
D0	115.432	41.7293	14.9071	11.4396	1.30312	0.833019	1.18226	1	D	0	GH21	SCA6	D-0-GH21-SCA6
D0	156.79	49.586	17.9161	12.2726	1.45985	0.801328	0.791868	1	D	0	GH21	SCA6	D-0-GH21-SCA6
D0	155.556	49.0468	18.4926	12.9577	1.42715	0.812594	1.20288	1	D	0	GH21	SCA6	D-0-GH21-SCA6
D0	166.049	51.1574	17.9505	13.4256	1.33704	0.797317	2.87479	1	D	0	GH21	SCA6	D-0-GH21-SCA6
D0	85.1852	39.7767	16.5179	7.11458	2.32169	0.676577	3.17524	1	D	0	GH21	SCA6	D-0-GH21-SCA6
D0	74.0741	35.3322	13.3795	8.95806	1.49358	0.745649	1.57828	1	D	0	GH21	SCA6	D-0-GH21-SCA6
D0	82.716	39.2375	15.9087	8.46197	1.88002	0.675146	1.18095	1	D	0	GH21	SCA6	D-0-GH21-SCA6
D0	143.21	47.3638	18.0876	11.3312	1.59627	0.802213	0.952866	1	D	0	GH21	SCA6	D-0-GH21-SCA6
D0	86.4197	35.7135	13.0052	9.49334	1.36993	0.851449	0.088733	1	D	0	GH21	SCA6	D-0-GH21-SCA6
D0	61.1111	38.2053	16.4054	4.96904	3.30152	0.526117	4.13819	1	D	0	GH21	SCA6	D-0-GH21-SCA6
D0	86.4197	41.9989	17.3561	7.11458	2.43951	0.615669	1.29435	1	D	0	GH21	SCA6	D-0-GH21-SCA6
D0	77.7778	43.3006	18.2236	5.55556	3.28024	0.521287	3.26484	1	D	0	GH21	SCA6	D-0-GH21-SCA6
D0	95.0617	40.1579	15.7919	9.55814	1.65219	0.740752	1.48441	1	D	0	GH21	SCA6	D-0-GH21-SCA6
D0	156.79	47.7451	17.9161	12.9577	1.38267	0.864314	0.930606	1	D	0	GH21	SCA6	D-0-GH21-SCA6
D0	61.1111	34.1421	14.2292	5.55556	2.56125	0.658793	4.33818	1	D	0	GH21	SCA6	D-0-GH21-SCA6
D0	146.296	48.9351	19.4047	10.2439	1.89426	0.767718	0.934748	1	D	0	GH21	SCA6	D-0-GH21-SCA6
D0	90.7407	39.507	16.178	8.08901	2	0.730572	1.03784	1	D	0	GH21	SCA6	D-0-GH21-SCA6
D0	44.4444	34.2538	14.8241	3.51364	4.21901	0.476003	5.92272	1	D	0	GH21	SCA6	D-0-GH21-SCA6
D0	234.568	61.6176	23.4389	13.3795	1.75185	0.77637	1.12424	1	D	0	GH21	SCA6	D-0-GH21-SCA6
D0	236.42	65.7924	25.9153	16.0247	1.61722	0.686344	1.29981	1	D	0	GH21	SCA6	D-0-GH21-SCA6
D0	64.8148	34.1421	14.1421	6.28539	2.25	0.698719	2.31369	1	D	0	GH21	SCA6	D-0-GH21-SCA6
D0	46.2963	28.7772	12.0185	5.55556	2.16333	0.70252	2.29208	1	D	0	GH21	SCA6	D-0-GH21-SCA6
D0	69.1358	31.6503	11.1111	8.67805	1.28037	0.867275	0.855175	1	D	0	GH21	SCA6	D-0-GH21-SCA6
D24	228.395	59.0141	19.6889	16.178	1.21702	0.824109	2.27641	1	D	24	GH21	SCA6	D-24-GH21-SCA6
D24	130.864	49.9673	19.4365	11.4396	1.69906	0.658657	3.55455	1	D	24	GH21	SCA6	D-24-GH21-SCA6
D24	220.988	57.5544	19.1163	17.5682	1.08812	0.83834	0.77988	1	D	24	GH21	SCA6	D-24-GH21-SCA6
D24	150.617	48.6655	17.3561	12.6686	1.37001	0.799174	1.48495	1	D	24	GH21	SCA6	D-24-GH21-SCA6
D24	191.975	53.7609	17.5682	15.1127	1.16248	0.834685	2.51722	1	D	24	GH21	SCA6	D-24-GH21-SCA6
D24	116.049	43.3006	16.178	10.2439	1.57928	0.777794	0.974985	1	D	24	GH21	SCA6	D-24-GH21-SCA6
D24	220.37	61.8872	21.0818	15.1127	1.39497	0.723038	4.20341	1	D	24	GH21	SCA6	D-24-GH21-SCA6
D24	104.321	44.3328	15.7135	12.5708	1.25	0.667009	1.60962	1	D	24	GH21	SCA6	D-24-GH21-SCA6
D24	154.321	47.7451	16.9239	13.0052	1.30132	0.850703	1.7174	1	D	24	GH21	SCA6	D-24-GH21-SCA6
D24	206.173	55.3322	19.6889	13.7437	1.43258	0.846224	2.09209	1	D	24	GH21	SCA6	D-24-GH21-SCA6
D24	50.6173	29.4281	11.8113	6.28539	1.87916	0.734488	1.99289	1	D	24	GH21	SCA6	D-24-GH21-SCA6
D24	195.062	56.7919	21.8299	11.6003	1.88183	0.759993	3.33135	1	D	24	GH21	SCA6	D-24-GH21-SCA6
D24	264.815	62.2685	20.9644	16.9604	1.23608	0.858254	2.44967	1	D	24	GH21	SCA6	D-24-GH21-SCA6
D24	107.407	40.5392	14.9071	9.93808	1.5	0.821285	2.06198	1	D	24	GH21	SCA6	D-24-GH21-SCA6
D24	237.037	58.4749	20.9644	16.0247	1.30826	0.871138	1.87786	1	D	24	GH21	SCA6	D-24-GH21-SCA6
D24	262.963	71.0457	28.0432	12.9577	2.16421	0.65468	6.58639	1	D	24	GH21	SCA6	D-24-GH21-SCA6
D24	235.185	60.0463	21.9145	15.436	1.4197	0.819687	0.292658	1	D	24	GH21	SCA6	D-24-GH21-SCA6
D24	230.864	64.7603	24.5955	13.0052	1.8912	0.691749	4.8075	1	D	24	GH21	SCA6	D-24-GH21-SCA6
D24	233.333	60.6971	21.9145	16.9604	1.2921	0.795885	0.566386	1	D	24	GH21	SCA6	D-24-GH21-SCA6
D24	181.481	58.0936	20.0308	14.0546	1.42522	0.675748	2.31809	1	D	24	GH21	SCA6	D-24-GH21-SCA6
D24	219.136	56.9036	20.0308	14.0546	1.42522	0.850441	3.8136	1	D	24	GH21	SCA6	D-24-GH21-SCA6
D24	262.346	65.4112	24.8452	14.6144	1.70005	0.770513	3.83368	1	D	24	GH21	SCA6	D-24-GH21-SCA6
D24	211.111	61.9989	24.4697	14.2292	1.71968	0.690166	0.638252	1	D	24	GH21	SCA6	D-24-GH21-SCA6
D24	301.235	74.1884	26.8742	16.4054	1.63813	0.687769	2.97411	1	D	24	GH21	SCA6	D-24-GH21-SCA6
D24	312.346	71.0457	24.3939	16.9604	1.43829	0.777624	6.56795	1	D	24	GH21	SCA6	D-24-GH21-SCA6
D24	230.247	69.8556	28.6744	12.6686	2.26342	0.592927	4.43459	1	D	24	GH21	SCA6	D-24-GH21-SCA6
D24	177.16	59.2837	23.8566	10.9432	2.18004	0.633441	3.3201	1	D	24	GH21	SCA6	D-24-GH21-SCA6
D24	61.7284	31.6503	10.9432	8.46197	1.29322	0.774353	0.879088	1	D	24	GH21	SCA6	D-24-GH21-SCA6
D24	89.5062	41.7293	15.7135	7.85674	2	0.645924	1.95243	1	D	24	GH21	SCA6	D-24-GH21-SCA6
D24	288.272	70.3948	25.9153	14.4871	1.78885	0.731022	2.47986	1	D	24	GH21	SCA6	D-24-GH21-SCA6
D24	50.6173	32.9521	13.7437	4.58123	3	0.585792	2.76976	1	D	24	GH21	SCA6	D-24-GH21-SCA6
D24	36.4197	25.6345	9.93808	4.96904	2	0.696461	2.11269	1	D	24	GH21	SCA6	D-24-GH21-SCA6
D24	72.2222	37.6661	14.8241	6.75862	2.19336	0.639704	1.08194	1	D	24	GH21	SCA6	D-24-GH21-SCA6
D48	185.185	57.5544	22.9061	13.3795	1.71203	0.70252	1.80772	1	D	48	GH21	SCA6	D-48-GH21-SCA6
D48	237.037	65.1416	24.4697	14.2292	1.71968	0.701955	4.98157	1	D	48	GH21	SCA6	D-48-GH21-SCA6
D48	195.062	54.0305	18.8889	14.9071	1.2671	0.839662	2.62088	1	D	48	GH21	SCA6	D-48-GH21-SCA6
D48	248.148	61.9989	22.7981	16.5179	1.38021	0.811247	1.48808	1	D	48	GH21	SCA6	D-48-GH21-SCA6
D48	262.346	64.1094	23.5702	15.7135	1.5	0.802121	0.915072	1	D	48	GH21	SCA6	D-48-GH21-SCA6
D48	184.568	55.4439	21.0818	10.5409	2	0.754499	6.68475	1	D	48	GH21	SCA6	D-48-GH21-SCA6
D48	141.975	51.8082	20.6679	9.55814	2.16233	0.664699	1.90283	1	D	48	GH21	SCA6	D-48-GH21-SCA6
D48	140.123	44.872	14.2292	13.3795	1.0635	0.874521	0.547345	1	D	48	GH21	SCA6	D-48-GH21-SCA6
D48	107.407	41.0784	15.1127	9.55814	1.58114	0.799866	3.32885	1	D	48	GH21	SCA6	D-48-GH21-SCA6
D48	150	49.3164	17.9161	11.1665	1.60445	0.775029	3.07672	1	D	48	GH21	SCA6	D-48-GH21-SCA6
D48	165.432	55.8714	21.5739	9.55814	2.25712	0.665963	1.59	1	D	48	GH21	SCA6	D-48-GH21-SCA6
D48	110.494	42.6497	14.8241	11.3312	1.30826	0.763334	0.682127	1	D	48	GH21	SCA6	D-48-GH21-SCA6
D48	223.457	57.5544	21.4591	14.4444	1.48563	0.847707	0.531128	1	D	48	GH21	SCA6	D-48-GH21-SCA6
D48	299.383	67.6334	24.3686	17.2848	1.40982	0.822459	2.65619	1	D	48	GH21	SCA6	D-48-GH21-SCA6
D48	216.049	57.9357	22.3607	13.9222	1.60612	0.808854	3.26477	1	D	48	GH21	SCA6	D-48-GH21-SCA6
D48	279.63	70.0135	27.3297	14.9071	1.83333	0.716851	3.14923	1	D	48	GH21	SCA6	D-48-GH21-SCA6
D48	182.099	54.3001	19.4365	12.9577	1.5	0.776097	1.4883	1	D	48	GH21	SCA6	D-48-GH21-SCA6
D48	207.407	59.0141	21.0818	13.0052	1.62103	0.74838	5.32423	1	D	48	GH21	SCA6	D-48-GH21-SCA6
D48	150.617	46.4433	16.9239	11.967	1.41421	0.877482	1.0648	1	D	48	GH21	SCA6	D-48-GH21-SCA6
D48	149.383	47.3638	16.6667	12.0185	1.38675	0.836791	1.93831	1	D	48	GH21	SCA6	D-48-GH21-SCA6
D48	256.79	67.3638	27.2392	12.4226	2.19272	0.711107	2.34877	1	D	48	GH21	SCA6	D-48-GH21-SCA6
D48	197.531	65.1416	24.8452	11.4396	2.17186	0.584963	4.76894	1	D	48	GH21	SCA6	D-48-GH21-SCA6
D0	85.8025	43.5702	16.5179	7.11458	2.32169	0.567976	4.5861	2	D	0	GH21	SCA6	D-0-GH21-SCA6
D0	69.7531	37.2848	14.9071	5.98352	2.49136	0.630535	3.15289	2	D	0	GH21	SCA6	D-0-GH21-SCA6
D0	74.6913	39.507	16.4054	6.47884	2.53215	0.601355	3.38376	2	D	0	GH21	SCA6	D-0-GH21-SCA6
D0	66.0494	32.8404	12.0185	7.11458	1.68928	0.769595	1.04445	2	D	0	GH21	SCA6	D-0-GH21-SCA6
D0	46.9136	30.7298	12.6686	4.58123	2.76533	0.624292	4.38701	2	D	0	GH21	SCA6	D-0-GH21-SCA6
D0	48.1481	33.4913	14.2292	4.71404	3.01846	0.539419	1.0253	2	D	0	GH21	SCA6	D-0-GH21-SCA6
D0	46.9136	28.1263	11.1111	6.47884	1.71499	0.745216	0.79761	2	D	0	GH21	SCA6	D-0-GH21-SCA6
D0	100	39.6187	14.2292	11.1111	1.28062	0.800588	1.92152	2	D	0	GH21	SCA6	D-0-GH21-SCA6
D0	93.8271	38.8562	15.1127	8.67805	1.74149	0.780941	1.5683	2	D	0	GH21	SCA6	D-0-GH21-SCA6
D0	47.5309	27.8567	11.1111	6.47884	1.71499	0.769706	0.910725	2	D	0	GH21	SCA6	D-0-GH21-SCA6
D0	76.5432	37.0152	14.9485	8.67805	1.72256	0.70203	0.421325	2	D	0	GH21	SCA6	D-0-GH21-SCA6
D0	50.6173	28.5076	11.1111	7.11458	1.56174	0.782685	1.20108	2	D	0	GH21	SCA6	D-0-GH21-SCA6
D0	59.2592	33.4913	13.4256	5.98352	2.24376	0.663901	0.547276	2	D	0	GH21	SCA6	D-0-GH21-SCA6
D0	71.6049	37.9357	15.9087	5.98352	2.65875	0.625254	4.12702	2	D	0	GH21	SCA6	D-0-GH21-SCA6
D0	58.0247	32.1895	12.9577	5.55556	2.33238	0.70371	3.5051	2	D	0	GH21	SCA6	D-0-GH21-SCA6
D0	123.457	49.9673	20.9644	8.95806	2.34028	0.621374	1.21278	2	D	0	GH21	SCA6	D-0-GH21-SCA6
D0	61.7284	32.5708	12.4226	6.75862	1.83804	0.731204	2.30567	2	D	0	GH21	SCA6	D-0-GH21-SCA6
D0	106.173	44.6024	17.9161	7.85674	2.28035	0.670668	1.74651	2	D	0	GH21	SCA6	D-0-GH21-SCA6
D0	121.605	46.1737	19.1163	9.55814	2	0.716756	3.21651	2	D	0	GH21	SCA6	D-0-GH21-SCA6
D0	63.5802	36.7456	14.9071	5.98352	2.49136	0.591726	2.45715	2	D	0	GH21	SCA6	D-0-GH21-SCA6
D0	93.8271	43.3006	17.9161	6.47884	2.76533	0.628854	3.44592	2	D	0	GH21	SCA6	D-0-GH21-SCA6
D0	46.9136	30.7298	12.6686	4.58123	2.76533	0.624292	3.7489	2	D	0	GH21	SCA6	D-0-GH21-SCA6
D0	121.605	43.9515	16.178	10.5409	1.53478	0.791068	1.51589	2	D	0	GH21	SCA6	D-0-GH21-SCA6
D0	39.5062	27.2059	10.9432	4.96904	2.20227	0.670733	2.94493	2	D	0	GH21	SCA6	D-0-GH21-SCA6
D0	71.6049	37.0152	14.8241	6.75862	2.19336	0.656738	1.65012	2	D	0	GH21	SCA6	D-0-GH21-SCA6
D0	30.8642	24.9836	9.16246	4.58123	2	0.621374	2.74004	2	D	0	GH21	SCA6	D-0-GH21-SCA6
D0	64.8148	30.9994	11.4396	7.45356	1.53478	0.847572	2.11543	2	D	0	GH21	SCA6	D-0-GH21-SCA6
D0	64.1975	34.793	14.4444	7.02728	2.05548	0.666414	2.27501	2	D	0	GH21	SCA6	D-0-GH21-SCA6
D0	64.8148	31.9199	12.4226	7.45356	1.66667	0.799394	0.402462	2	D	0	GH21	SCA6	D-0-GH21-SCA6
D0	38.8889	28.7772	11.8113	4.71404	2.50555	0.590117	2.04971	2	D	0	GH21	SCA6	D-0-GH21-SCA6
D0	49.3827	30.3486	11.967	4.96904	2.40832	0.673765	2.40384	2	D	0	GH21	SCA6	D-0-GH21-SCA6
D0	45.679	29.4281	11.6003	5.98352	1.93872	0.66283	0.926516	2	D	0	GH21	SCA6	D-0-GH21-SCA6
D0	73.4568	41.7293	17.3916	5.98352	2.90659	0.530103	3.92228	2	D	0	GH21	SCA6	D-0-GH21-SCA6
D0	33.9506	26.555	10.9432	4.00617	2.73158	0.605014	2.98099	2	D	0	GH21	SCA6	D-0-GH21-SCA6
D0	39.5062	25.9041	10.4822	5.55556	1.8868	0.739839	0.706536	2	D	0	GH21	SCA6	D-0-GH21-SCA6
[truncated: 5,559 more rows]
